# Supplementary material for: Dual molecular tweezers extending from a nanohoop
Source: Royal Society of Chemistry journal article supplement (doi:10.1039/d4cc03196b), 2024-01-01
Supplement: d4cc03196b1.pdf [file d4cc03196b1.pdf]

**Supplementary Information for:**

**“Dual molecular tweezers extending from a nanohoop”**

M. Saeed Mirzaei,<sup>1‡</sup> Saber Mirzaei,<sup>1,2‡</sup> Victor M. Espinoza Castro,<sup>1</sup> Charlotte Lawrence,<sup>1</sup> and Raúl Hernández Sánchez<sup>1,2\*</sup>

*<sup>1</sup>Department of Chemistry, Rice University,  
6100 Main St., Houston, Texas, 77005, USA.*

*<sup>2</sup>Department of Chemistry, University of Pittsburgh,  
219 Parkman Ave., Pittsburgh, PA, 15260, USA.*

<sup>‡</sup>These authors contributed equally, and each has the right to list themselves first in author order on their CVs.

Corresponding author e-mail:

raulhs@rice.edu

## Table of Contents

|                                                                                                                                                                             |     |
|-----------------------------------------------------------------------------------------------------------------------------------------------------------------------------|-----|
| <b>Experimental section</b>                                                                                                                                                 | S4  |
| <b>Table S1:</b> Crystallographic data for compound <b>1</b> .                                                                                                              | S12 |
| <b>Figure S1.</b> <sup>1</sup> H and <sup>13</sup> C NMR spectra of <b>3a</b> .                                                                                             | S13 |
| <b>Figure S2.</b> COSY NMR spectrum of <b>3a</b> .                                                                                                                          | S14 |
| <b>Figure S3.</b> <sup>1</sup> H and <sup>13</sup> C NMR spectra of <b>2</b> .                                                                                              | S15 |
| <b>Figure S4.</b> COSY NMR spectrum of <b>2</b> .                                                                                                                           | S16 |
| <b>Figure S5.</b> <sup>1</sup> H and <sup>13</sup> C NMR spectra of <b>1</b> in CD <sub>2</sub> Cl <sub>2</sub> .                                                           | S17 |
| <b>Figure S6.</b> COSY NMR spectrum of <b>1</b> in CD <sub>2</sub> Cl <sub>2</sub> .                                                                                        | S18 |
| <b>Figure S7.</b> NOESY NMR spectrum of <b>1</b> in CD <sub>2</sub> Cl <sub>2</sub> .                                                                                       | S19 |
| <b>Figure S8.</b> <sup>1</sup> H NMR spectrum of <b>1</b> in 1,1,2,2-tetrachloroethane.                                                                                     | S20 |
| <b>Figure S9.</b> <sup>1</sup> H and <sup>13</sup> C NMR spectra of <b>3b</b> .                                                                                             | S21 |
| <b>Figure S10.</b> COSY NMR spectrum of <b>3b</b> .                                                                                                                         | S22 |
| <b>Figure S11.</b> DFT optimized structure of <b>1'</b> (R = Me) and <b>1''</b><br>(R = 1,3-di- <i>tert</i> -butylphenyl).                                                  | S23 |
| <b>Figure S12.</b> DFT conformational analysis of <b>1'</b> (R = Me) and <b>1''</b><br>(R = 1,3-di- <i>tert</i> -butylphenyl).                                              | S24 |
| <b>Figure S13.</b> Dibenzo[a,c]phenzine rotational barrier in <b>1'</b> (R = Me).                                                                                           | S25 |
| <b>Figure S14.</b> Strain energy calculations for <b>1'</b> (R = Me).                                                                                                       | S26 |
| <b>Table S2.</b> DFT calculated absorption energies ( $\lambda$ , nm), oscillator strengths ( $f$ ),<br>and main contributions with its percentages for <b>1'</b> (R = Me). | S27 |
| <b>Figure S15.</b> HOMO and LUMO of <b>1'</b> (R = Me) calculated by DFT.                                                                                                   | S28 |
| <b>Figure S16.</b> Emission profile of <b>1</b> in a variety of solvents.                                                                                                   | S29 |
| <b>Figure S17.</b> Gradient value determination for calculating quantum yield of <b>1</b> .                                                                                 | S30 |
| <b>Figure S18:</b> <sup>1</sup> H NMR titration spectra of C <sub>60</sub> into <b>1</b> .                                                                                  | S31 |
| <b>Figure S19.</b> Non-linear curve fitting of <sup>1</sup> H NMR titration of C <sub>60</sub> into <b>1</b> .                                                              | S32 |
| <b>Figure S20.</b> Non-linear curve fitting of fluorescence quenching titration of C <sub>60</sub> into <b>1</b> .                                                          | S33 |

|                                                                                                                         |      |
|-------------------------------------------------------------------------------------------------------------------------|------|
| <b>Figure S21.</b> DFT optimized structure of [(C <sub>60</sub> ) <sub>2</sub> ⊂ <b>1'</b> ].                           | S34  |
| <b>Figure S22.</b> IGMH isosurfaces showing noncovalent interactions in [(C <sub>60</sub> ) <sub>2</sub> ⊂ <b>1'</b> ]. | S35  |
| <b>Table S3.</b> DFT calculated <sup>1</sup> H NMR data of <b>1'</b> (R = Me).                                          | S36  |
| <b>Cartesian coordinates of optimized molecules.</b>                                                                    | S37  |
| <b>References</b>                                                                                                       | S101 |

## Experimental section

**General considerations.** Manipulations involving air sensitive reactions were performed under an atmosphere of dry, oxygen-free N<sub>2</sub> by means of standard Schlenk or glovebox techniques (MBraun glovebox equipped with a –35 °C freezer). All glassware was oven dried for a minimum of 10 h and cooled in an evacuated antechamber prior to use in the drybox. Anhydrous and anaerobic tetrahydrofuran (THF), diethyl ether (Et<sub>2</sub>O), hexanes, dimethylformamide (DMF), and 1,4-dioxane were dried and deoxygenated on dual high-performance columns within a Glass Contour 800L Solvent Purification System and stored over 4 Å molecular sieves prior to use. Chemicals and solvents were purchased from commercial suppliers and used as received.

<sup>1</sup>H- and <sup>13</sup>C- nuclear magnetic resonance (NMR) spectra were obtained on any of the following instruments: a) Bruker Avance 400 spectrometer at 400 and 100 MHz b) Bruker Avance 500 spectrometer at 500 and 125 MHz and c) Bruker Avance 600 spectrometer at 600 and 150 MHz, respectively. Chemical shifts for protons are reported in parts per million (ppm) downfield from tetramethylsilane (TMS) and are referenced to residual protium in the NMR solvent (CHCl<sub>3</sub>: δ 7.26; CH<sub>2</sub>Cl<sub>2</sub>: δ 5.32). Chemical shifts for carbon are reported in ppm downfield from TMS and are referenced to the carbon resonances of the solvent (CHCl<sub>3</sub>: δ 77.2 and CH<sub>2</sub>Cl<sub>2</sub>: δ 54.0). Data are presented as follows: chemical shift, multiplicity (s = singlet, d = doublet, t = triplet, m = multiplet, br = broad), coupling constants in Hertz, and integration.

High-resolution mass spectrometry (HRMS) was performed on a (1) Thermo Scientific Q-Exactive Orbitrap instrument equipped with a Dionex Ultimate 3000 (RSLC) inlet system, and electrospray (ESI) and atmospheric pressure chemical (APCI) ionization sources; or (2) a Bruker Daltonics UltrafleXtreme MALDI TOF/TOF MS instrument using dithranol (DIT) matrix.

Absorption spectra were obtained on a Cary 60 UV-Vis spectrophotometer and emission spectra were recorded in an Agilent Cary Eclipse Fluorescence spectrophotometer.

**Quantum yield determination.** Fluorescence quantum yields of the molecules **1** and **3b** were determined using the relative method as described by Williams and co-workers.<sup>1</sup>

$$\phi_x = \phi_r \times \frac{\text{Grad}_x}{\text{Grad}_r} \times \frac{\eta_x^2}{\eta_r^2}$$

Where  $\phi$  is the quantum yield,  $x$  stands for the measured sample, and  $r$  for the standard fluorescent compound, Grad (gradient) is the slope of the fitted line in the integrated emission area vs absorption plots ( $\text{Grad} = \frac{E}{A}$ ), and  $\eta$  is the refractive index of the solvent. About five solutions in dichloromethane of each compound were prepared with absorption values ranging from 0.01 to 0.1 at 400 nm. Fluorescence data was collected using 400 nm as the excitation wavelength. The same procedure was used for the standard fluorophore (Coumarin 153, C153). Gradient plots are shown in Figure S15. The quantum yield of coumarin 153 (0.544) was obtained from the literature and data herein was collected in anhydrous ethanol ( $\eta = 1.36$ ).<sup>2</sup> For molecules **1** and **3b**, anhydrous DCM ( $\eta = 1.42$ ) has been use as the solvent.

## Synthetic details.

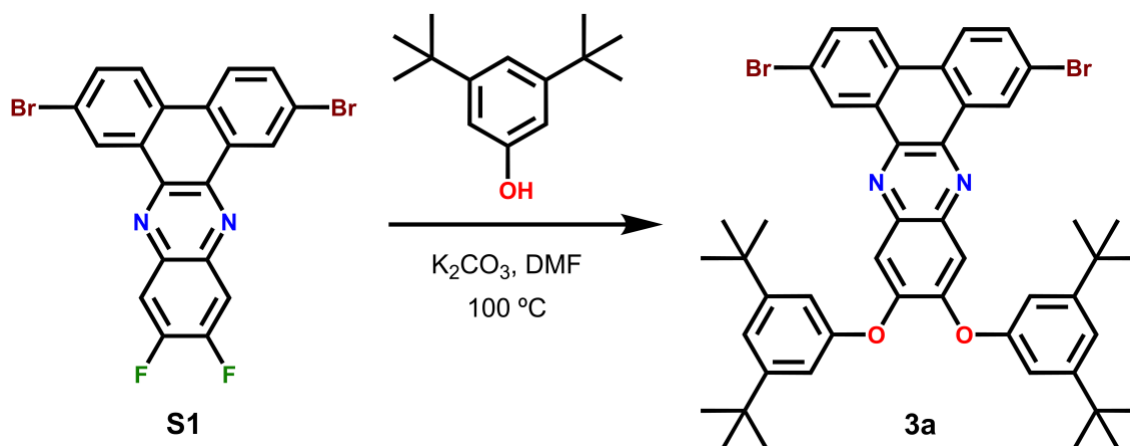

Compound **3a**. Compound **S1** was prepared according to the reported procedure.<sup>3</sup> A 500 mL round bottom flask was loaded with 1.5 g of **S1** (3.18 mmol), 1.6 g of 3,5-di-*tert*-butylphenol (7.9 mmol, 2.5 eq), and 5.0 g of  $K_2CO_3$  in 200 mL of DMF. The reaction mixture was stirred vigorously at  $100\text{ }^\circ\text{C}$  for ~16 h. Then, the reaction mixture was cooled down to room temperature and 250 mL DI water was added to the flask and stirred for 5 min. The precipitate was filtered and washed with copious amounts of DI water. Subsequently, the pure product (light yellow solid) was obtained by washing the precipitate with 300 mL of MeOH. Yield: 93% (2.7 g, 3.2 mmol).

**$^1\text{H}$  NMR** (400 MHz,  $CDCl_3$ ,  $20\text{ }^\circ\text{C}$ ): 9.29 (d,  $J = 2.2\text{ Hz}$ , 1H), 8.24 (d,  $J = 8.7\text{ Hz}$ , 1H), 7.75 (dd,  $J = 6.4$  and  $2.2\text{ Hz}$ , 1H), 7.50 (s, 1H), 7.38 (t,  $J = 1.6\text{ Hz}$ , 1H), 7.17 (d,  $J = 1.6\text{ Hz}$ , 2H), and 1.39 (s, 18H).

**$^{13}\text{C}$  NMR** (100 MHz,  $CDCl_3$ ,  $20\text{ }^\circ\text{C}$ ): 154.6, 153.9, 153.4, 140.4, 139.4, 132.7, 131.9, 129.5, 128.5, 124.6, 122.7, 119.5, 115.1, 112.0, 35.3, and 31.7.

**HRMS (APCI)**,  $C_{48}H_{50}Br_2N_2O_2$ ,  $[M+H]^+$  calc.: 845.2312; exp.: 845.2319.

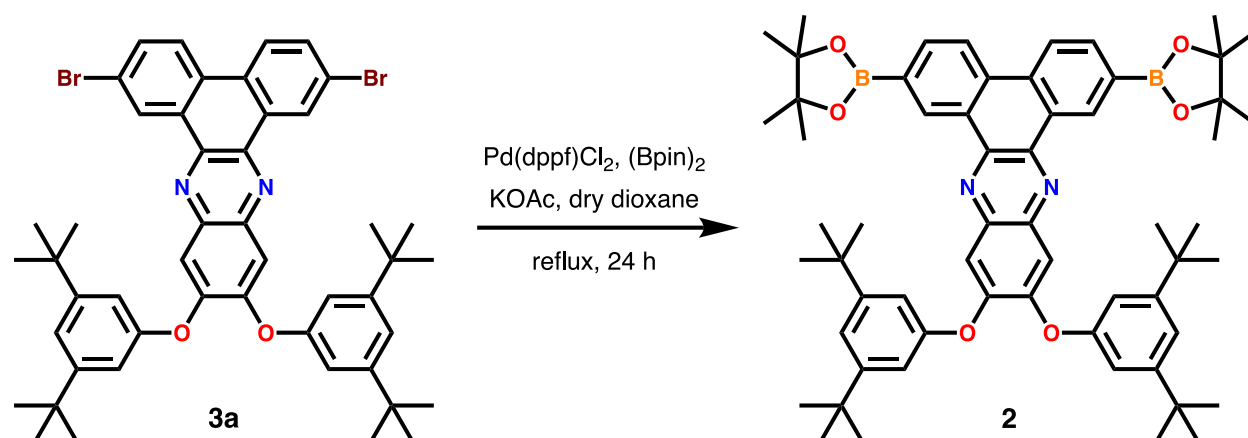

Compound **2**. A 250 mL Pyrex Schlenk flask was loaded with 1.5 g of **3a** (1.8 mmol), 0.9 g of bis(pinacolato)diboron (3.9 mmol, 2.2 eq), and 1.5 g of KOAc. The flask was left under high vacuum for 4 hours at room temperature. The flask was then back filled with nitrogen gas. Around 0.13 g (10% mmol) of Pd(dppf)Cl<sub>2</sub> and 100 mL of dry dioxane was added to the flask. The solution was degassed for an additional 10 minutes while gradually increasing the temperature to reflux. Then, the reaction mixture was refluxed under N<sub>2</sub> for 24 h. The solvent was removed under vacuum and the black solid was passed through a pack of silica gel using pure DCM. The DCM was removed, and the pure final product (light yellow solid) was obtained after washing with MeOH. Yield: 64% (1.1 g, 1.1 mmol).

<sup>1</sup>H NMR (400 MHz, CDCl<sub>3</sub>, 20 °C): 9.70 (d, *J* = 0.7 Hz, 1H), 8.59 (d, *J* = 8.2 Hz, 1H), 8.16 (dd, *J* = 7.0 and 1.0 Hz, 1H), 7.66 (s, 1H), 7.38 (t, *J* = 1.5 Hz, 1H), 7.16 (d, *J* = 1.5 Hz, 2H), 1.42 (s, 12H), and 1.39 (s, 18H).

<sup>13</sup>C NMR (100 MHz, CDCl<sub>3</sub>, 20 °C): 155.0, 153.2, 153.0, 141.0, 140.1, 135.5, 133.8, 132.8, 130.2, 128.7, 122.6, 119.3, 115.0, 112.9, 84.2, 35.3, 31.7, and 25.1.

HRMS (APCI), C<sub>60</sub>H<sub>74</sub>B<sub>2</sub>N<sub>2</sub>O<sub>6</sub>, [M+H]<sup>+</sup> calc.: 941.5806; exp.: 941.5865.

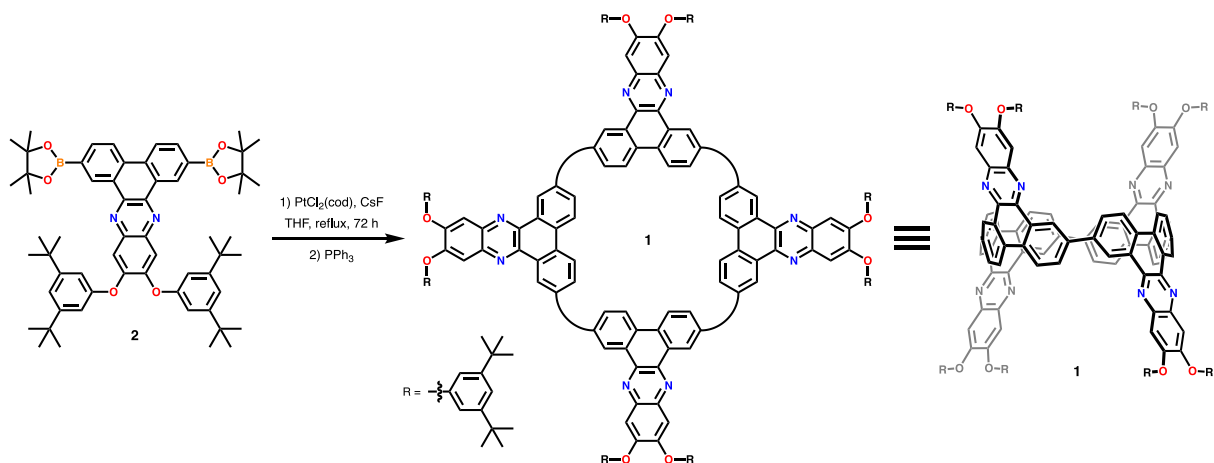

Compound **1**. A 150 mL pressure flask inside the nitrogen filled glovebox, containing a magnetic stirring bar was added **2** (0.3 g, 0.3 mmol), CsF (0.9 g, 20 eq), Pt(cod)Cl<sub>2</sub> (0.12 g, 0.33 mmol, 1.1 eq) and anhydrous THF (60 mL). Then the mixture was stirred at 80 °C for 48 hours. After cooling down to room temperature, the solvent was removed under high vacuum. Anhydrous toluene (50 mL) and triphenylphosphine (1.0 g, 4.0 mmol, 40 eq) were added to this brown solid material. The mixture was stirred at 120 °C for 24 hours. After the reaction mixture was cooled down to room temperature, the solvent was removed and the brown solid was washed with MeOH to remove CsF and PPh<sub>3</sub>. The crude product was purified by silica gel column chromatography using a gradient of 40-80% DCM in hexanes. The final product (yellowish-orange solid) was purified further by prep-TLC using 50% DCM in hexanes.

From preparatory TLC, the orange band was scrapped off, filtered, and washed with DCM. The solvent was removed and the resulting orange solid was crystallized by slow diffusion of acetonitrile into a 1:1 solution of **1** in DCM:*ortho*-dichlorobenzene (*o*DCB). Yield: 9% (19 mg, 0.007 mmol)

**<sup>1</sup>H NMR** (400 MHz, CD<sub>2</sub>Cl<sub>2</sub>, 20 °C): 8.77 (d, *J* = 1.7 Hz, 1H), 8.24 (dd, *J* = 7.3 and 1.7 Hz, 1H), 8.10 (d, *J* = 9.0 Hz, 1H), 7.57 (s, 1H), 7.42 (s, 1H), 7.14 (d, *J* = 1.5 Hz, 2H), and 1.41 (s, 18H).

**<sup>13</sup>C NMR** (100 MHz, CD<sub>2</sub>Cl<sub>2</sub>, 20 °C): 155.4, 153.8, 153.1, 142.6, 150.5, 136.4, 131.8, 130.5, 126.8, 124.3, 119.6, 114.8, 113.5, 35.5, and 31.7.

**<sup>1</sup>H NMR** (400 MHz, 1,1,2,2-tetrachloroethane-*d*<sub>2</sub>, 20 °C): 8.53 (d, *J* = 8.9 Hz, 1H), 8.29 (d, *J* = 8.9, 1H), 8.14 (d, *J* = 9.1, 1H), 7.60 (s, 1H), 7.41 (s, 1H), 7.15 (s, 2H), and 1.44 (s, 18H).

**HRMS (APCI)**, C<sub>192</sub>H<sub>200</sub>N<sub>8</sub>O<sub>8</sub>, [M+H]<sup>+</sup> calc.: 2746.5561; exp.: 2746.5557.



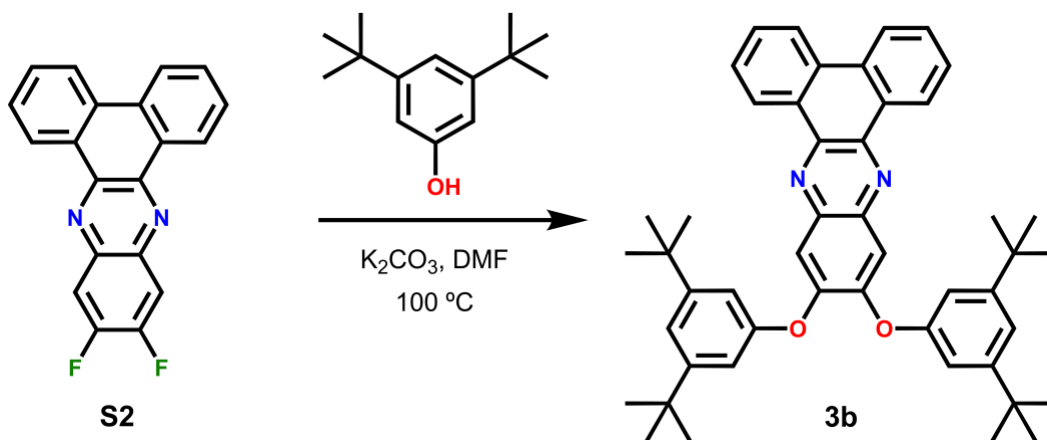

Compound **3b**. Compound **S2** has previously been reported.<sup>4</sup> A 500 mL round bottom flask was loaded with 0.5 g of **S2** (1.6 mmol), 0.7 g of 3,5-di-*tert*-butylphenol (3.47 mmol, 2.2 eq), and 0.9 g of  $\text{K}_2\text{CO}_3$  in 100 mL of DMF. The reaction mixture was stirred vigorously at 100 °C for ~16 hours. Then, the reaction mixture was cooled down to room temperature and 250 mL DI water was added to the flask and stirred for 5 min. The precipitate was filtered and washed with copious amounts of DI water. Subsequently, the pure product (light yellow solid) was obtained by washing the precipitate with 300 mL of MeOH. Yield: 70% (0.7 g, 1.0 mmol).

**<sup>1</sup>H NMR** (500 MHz,  $\text{CDCl}_3$ , 20 °C): 9.31 (d,  $J = 7.9$  Hz, 1H), 8.56 (d,  $J = 8.0$  Hz, 1H), 7.76 (t,  $J = 7.0$  Hz, 1H), 7.70 (t,  $J = 7.7$  Hz, 1H), 7.63 (s, 1H), 7.35 (s, 1H), 7.14 (d,  $J = 1.5$  Hz, 2H), and 1.37 (s, 18H).

**<sup>13</sup>C NMR** (125 MHz,  $\text{CDCl}_3$ , 20 °C): 154.9, 155.3, 153.3, 140.8, 139.9, 131.8, 130.2, 130.0, 128.0, 126.1, 123.0, 119.3, 115.0, 112.4, 35.3, and 31.6.

**HRMS (APCI)**,  $\text{C}_{48}\text{H}_{52}\text{N}_2\text{O}_2$ ,  $[\text{M}+\text{H}]^+$  calc.: 689.4102; exp.: 689.4105.

Single crystal data for **1** was collected on a Rigaku Synergy-S diffractometer equipped with dual-beam microfocus Cu K $\alpha$  and Mo K $\alpha$  X-ray radiation sources paired with a Rigaku's HyPix-Arc150 detector. Temperature was maintained using an Oxford Cryosystem nitrogen flow apparatus. Single crystals suitable for X-ray structure analysis were coated with Paratone N-oil and mounted on MiTeGen Kapton loops (polyimide). Data from Rigaku's diffractometer was integrated and corrected using CrysAlisPro V42. Space group assignments were determined by examination of systematic absences, E-statistics, and successive refinement of the structures. The program PLATON<sup>5-6</sup> was employed to confirm the absence of higher symmetry in the crystal. The positions of the heavy atoms were determined using intrinsic phasing methods using the program SHELXT<sup>7</sup> and SHELXL<sup>8</sup> with Olex2<sup>9</sup> interface. Successive cycles of least-square refinement followed by difference Fourier syntheses revealed the positions of the remaining non-hydrogen atoms. Non-hydrogen atoms were refined with anisotropic displacement parameters, and hydrogen atoms were added in idealized positions. Crystallographic data for **1** is given in Table S1.

The crystal structure of **1** contains at least 8 well-defined molecules of *o*DCB. A region of electron density contains is observed in the structure that may contain heavily disorder DCM, *o*DCB, or MeCN (solvents used during crystallization). Thus, a solvent mask was used to facilitate the structure modeling (solvent r = 1.2 Å and truncation = 1.2 Å). All *tert*-butyl groups present disorder, therefore C–C distances within this group were restrained.

**Computational details.** All calculations were carried out using Gaussian 16 software package.<sup>10</sup> B3LYP<sup>11</sup> functional of density functional theory (DFT) is used for all optimizations and subsequent studies of neutral molecules. The frequency calculations were carried out for optimized structures to ensure the absence of any imaginary frequencies for the ground state molecules. In order to include the dispersion effects, the D3 version of Grimme with Becke-Johnson damping factors (D3BJ) were used.<sup>12</sup> The implicit solvation effects were included using the polarizable continuum model (PCM) with standard parameters of CH<sub>2</sub>Cl<sub>2</sub>.<sup>13</sup> The gauge-independent atomic orbital (GIAO) method<sup>14</sup> was used for <sup>1</sup>H NMR chemical shift calculations. The DFT calculated <sup>1</sup>H NMR chemical shifts assisted in assigning the experimental spectra. In order to decrease the computational costs, the solubilizing groups (3,5-di-*tert*-butylphenyl) were replaced with methyl groups. For complete structures, the atoms comprising the 3,5-di-*tert*-butylphenyl groups were

fixed and their positions frozen during geometry optimization and followed by analytical frequency calculations performed at 3-21G(d) basis set. The optimized geometry of **1** complexed with two molecules of C<sub>60</sub> was further used to generate the wavefunction file for the visualization of weak interactions based on the independent gradient model using Hirshfeld partition of molecular density (IGMH) method.<sup>15</sup> The isosurface map was rendered by VMD 1.9.3 program<sup>16</sup> based on the cube files generated by MultiWFN 3.8.<sup>17</sup>

**Table S1.** Crystallographic data for compound **1**.

| <b>1</b>                                              |                                                                                                                       |
|-------------------------------------------------------|-----------------------------------------------------------------------------------------------------------------------|
| <b>CCDC Number</b>                                    | 2385495                                                                                                               |
| <b>Chemical formula</b>                               | C <sub>192</sub> H <sub>200</sub> N <sub>8</sub> O <sub>8</sub><br>·8(C <sub>6</sub> H <sub>4</sub> Cl <sub>2</sub> ) |
| <b>Formula weight</b>                                 | 3923.52                                                                                                               |
| <b>Space group</b>                                    | <i>P</i> -1                                                                                                           |
| <i>a</i> (Å)                                          | 14.7048(4)                                                                                                            |
| <i>b</i> (Å)                                          | 23.2163(8)                                                                                                            |
| <i>c</i> (Å)                                          | 32.0917(9)                                                                                                            |
| <i>α</i> (deg)                                        | 81.364(3)                                                                                                             |
| <i>β</i> (deg)                                        | 79.536(2)                                                                                                             |
| <i>γ</i> (deg)                                        | 89.251(2)                                                                                                             |
| <i>V</i> (Å <sup>3</sup> )                            | 10650.3(6)                                                                                                            |
| <i>Z</i>                                              | 2                                                                                                                     |
| <i>μ</i> (mm <sup>-1</sup> )                          | 2.36                                                                                                                  |
| <b>T (K)</b>                                          | 100                                                                                                                   |
| <b><i>R</i><sub>int</sub></b>                         | 0.079                                                                                                                 |
| <b><i>R1</i><sup>a</sup> (<i>wR2</i><sup>b</sup>)</b> | 0.279 (0.667)                                                                                                         |
| <b>Reflections</b>                                    | 41997                                                                                                                 |
| <b>Radiation type</b>                                 | Cu <i>Kα</i>                                                                                                          |

$${}^aR1 = [\sum w(F_o - F_c)^2 / \sum w F_o^2]^{1/2}; {}^b wR2 = [\sum [w(F_o^2 - F_c^2)^2] / \sum w(F_o^2)^2]^{1/2}, w = 1/[\sigma^2(F_o^2) + (aP)^2 + bP], \text{ where } P = [\max(F_o^2, 0) + 2(F_c^2)]/3$$

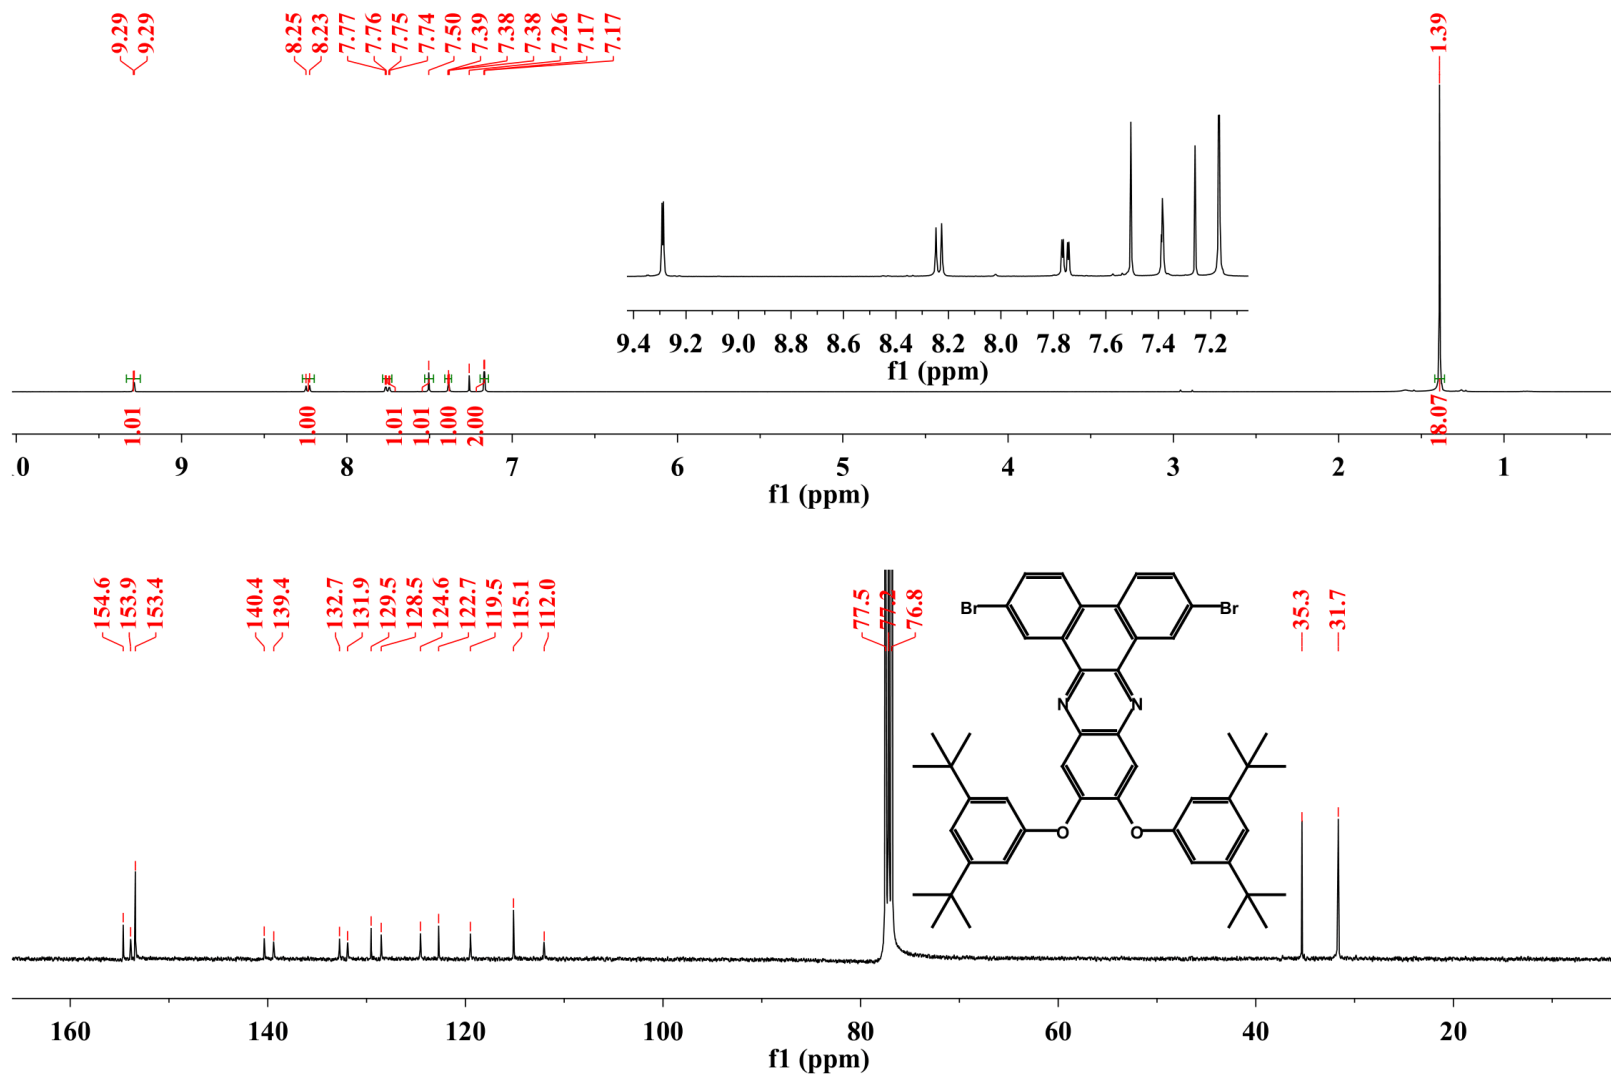

**Figure S1.** <sup>1</sup>H and <sup>13</sup>C NMR spectra of **3a**. Data collected in CDCl<sub>3</sub> at 20 °C.

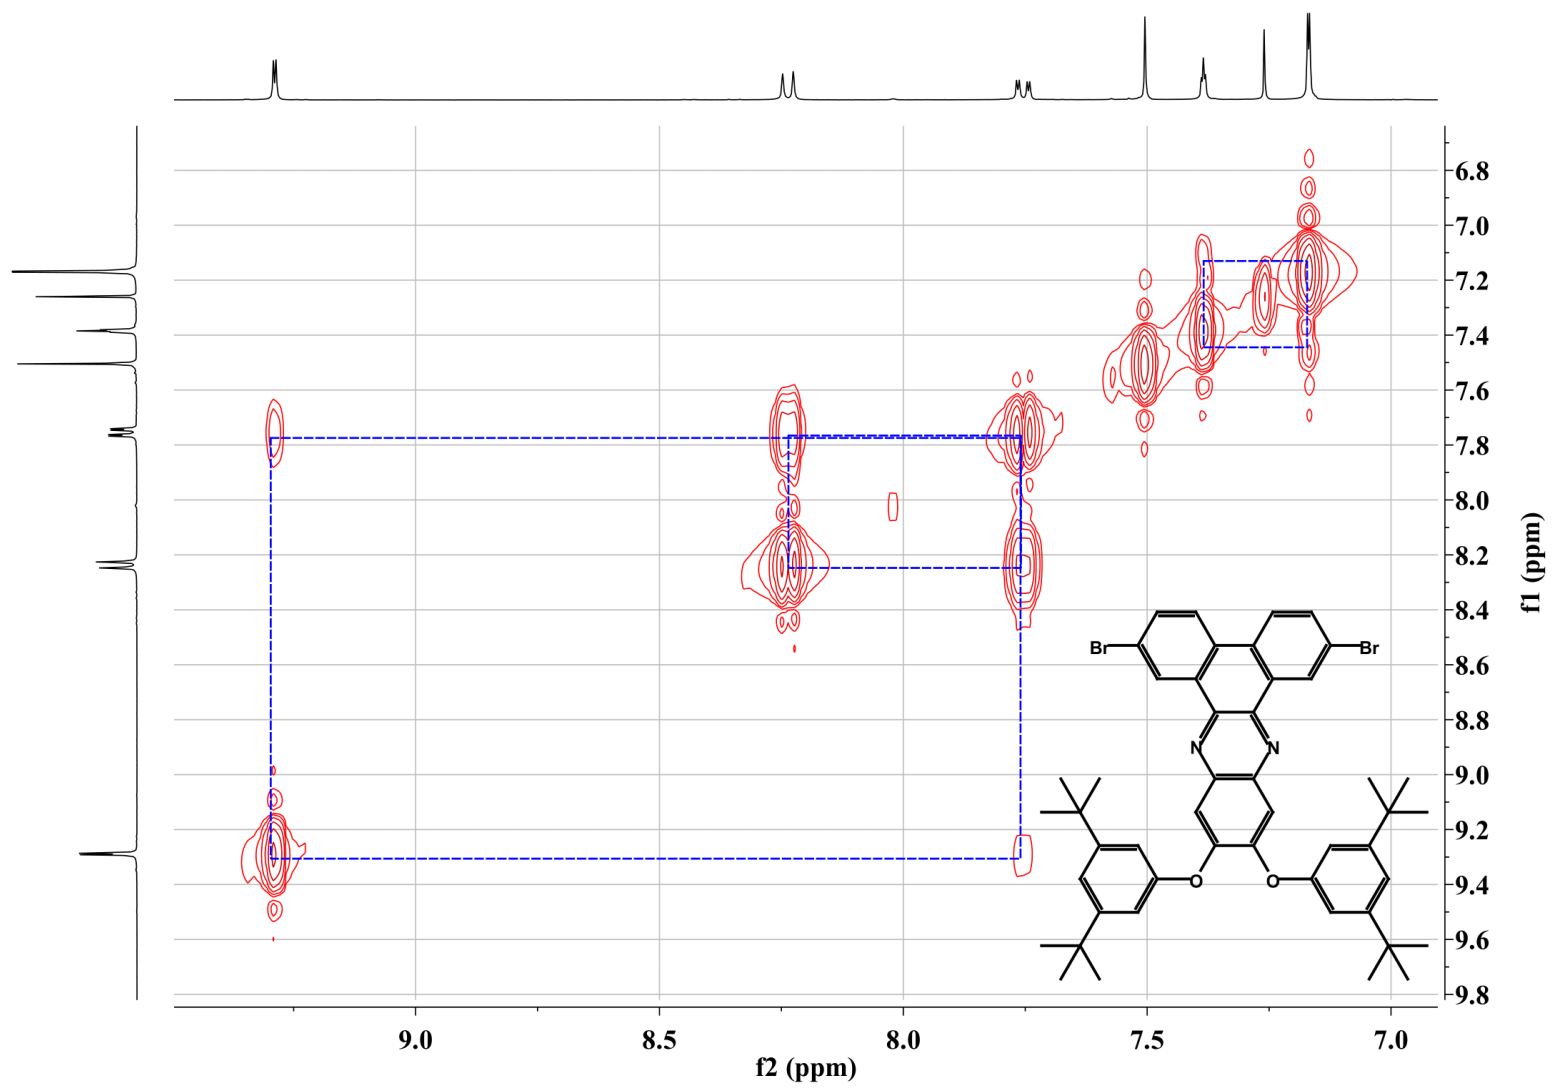

**Figure S2.** COSY NMR spectrum of **3a**. Data collected in CDCl<sub>3</sub> at 20 °C.

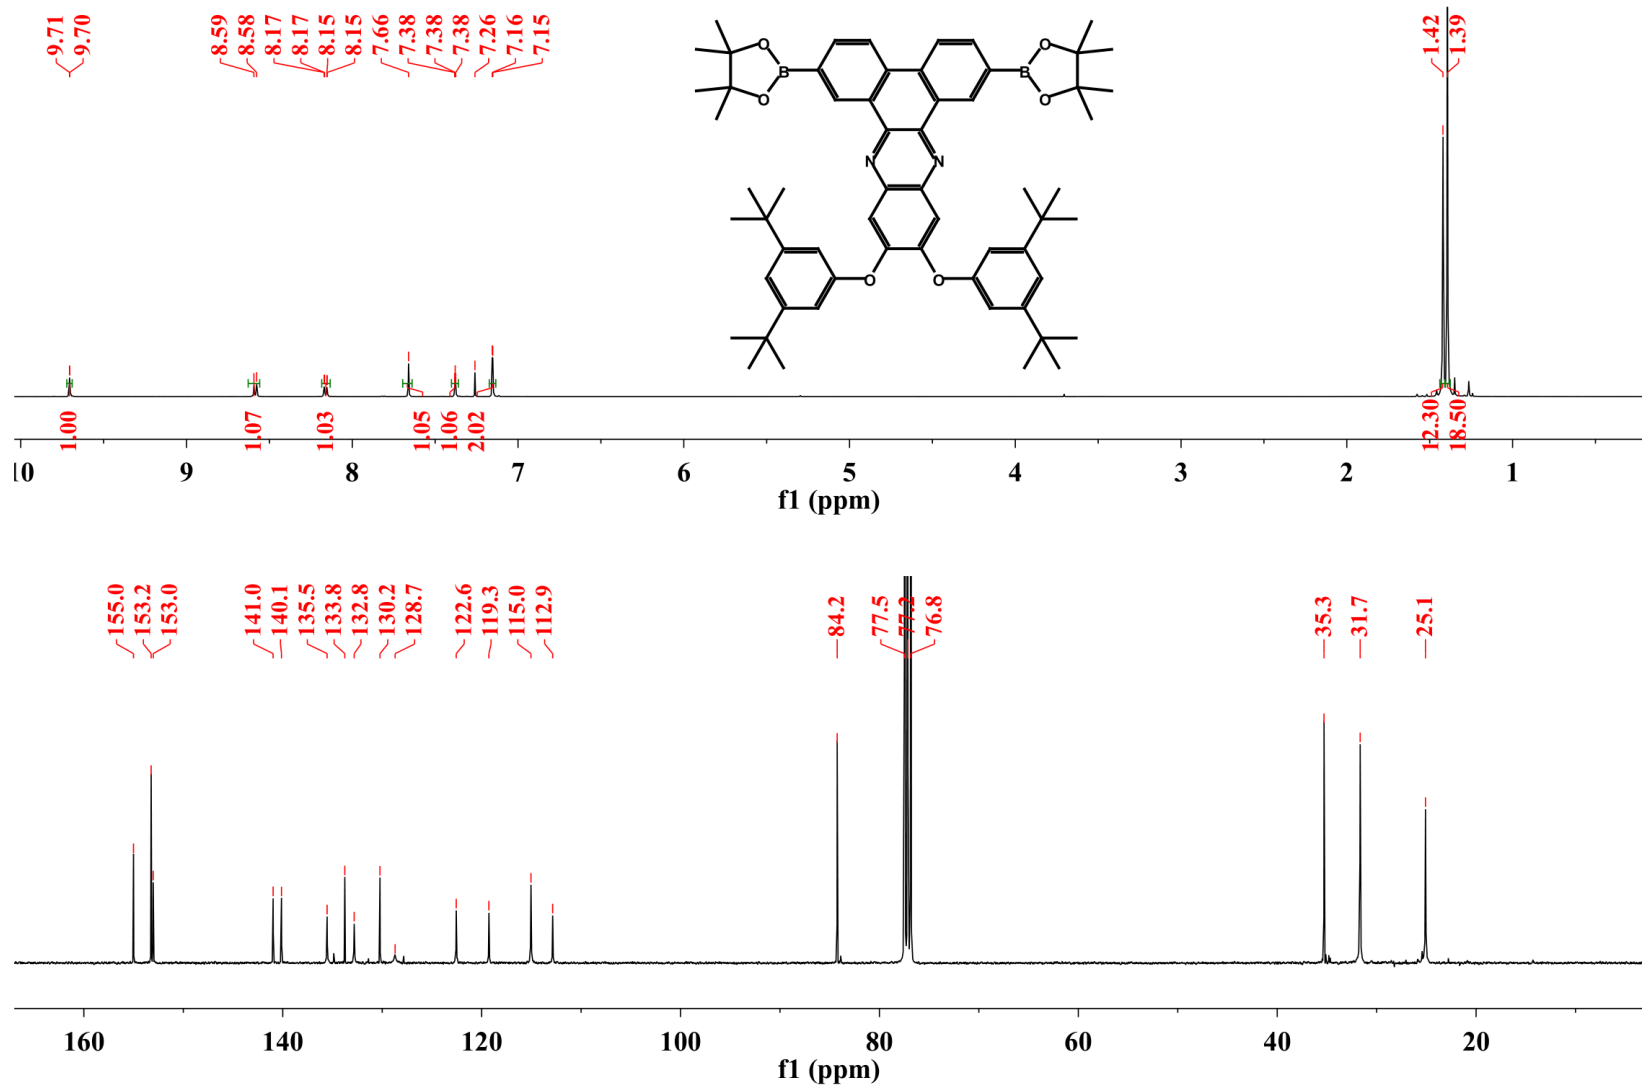

Figure S3.  $^1\text{H}$  and  $^{13}\text{C}$  NMR spectra of **2**. Data collected in  $\text{CDCl}_3$  at 20 °C.

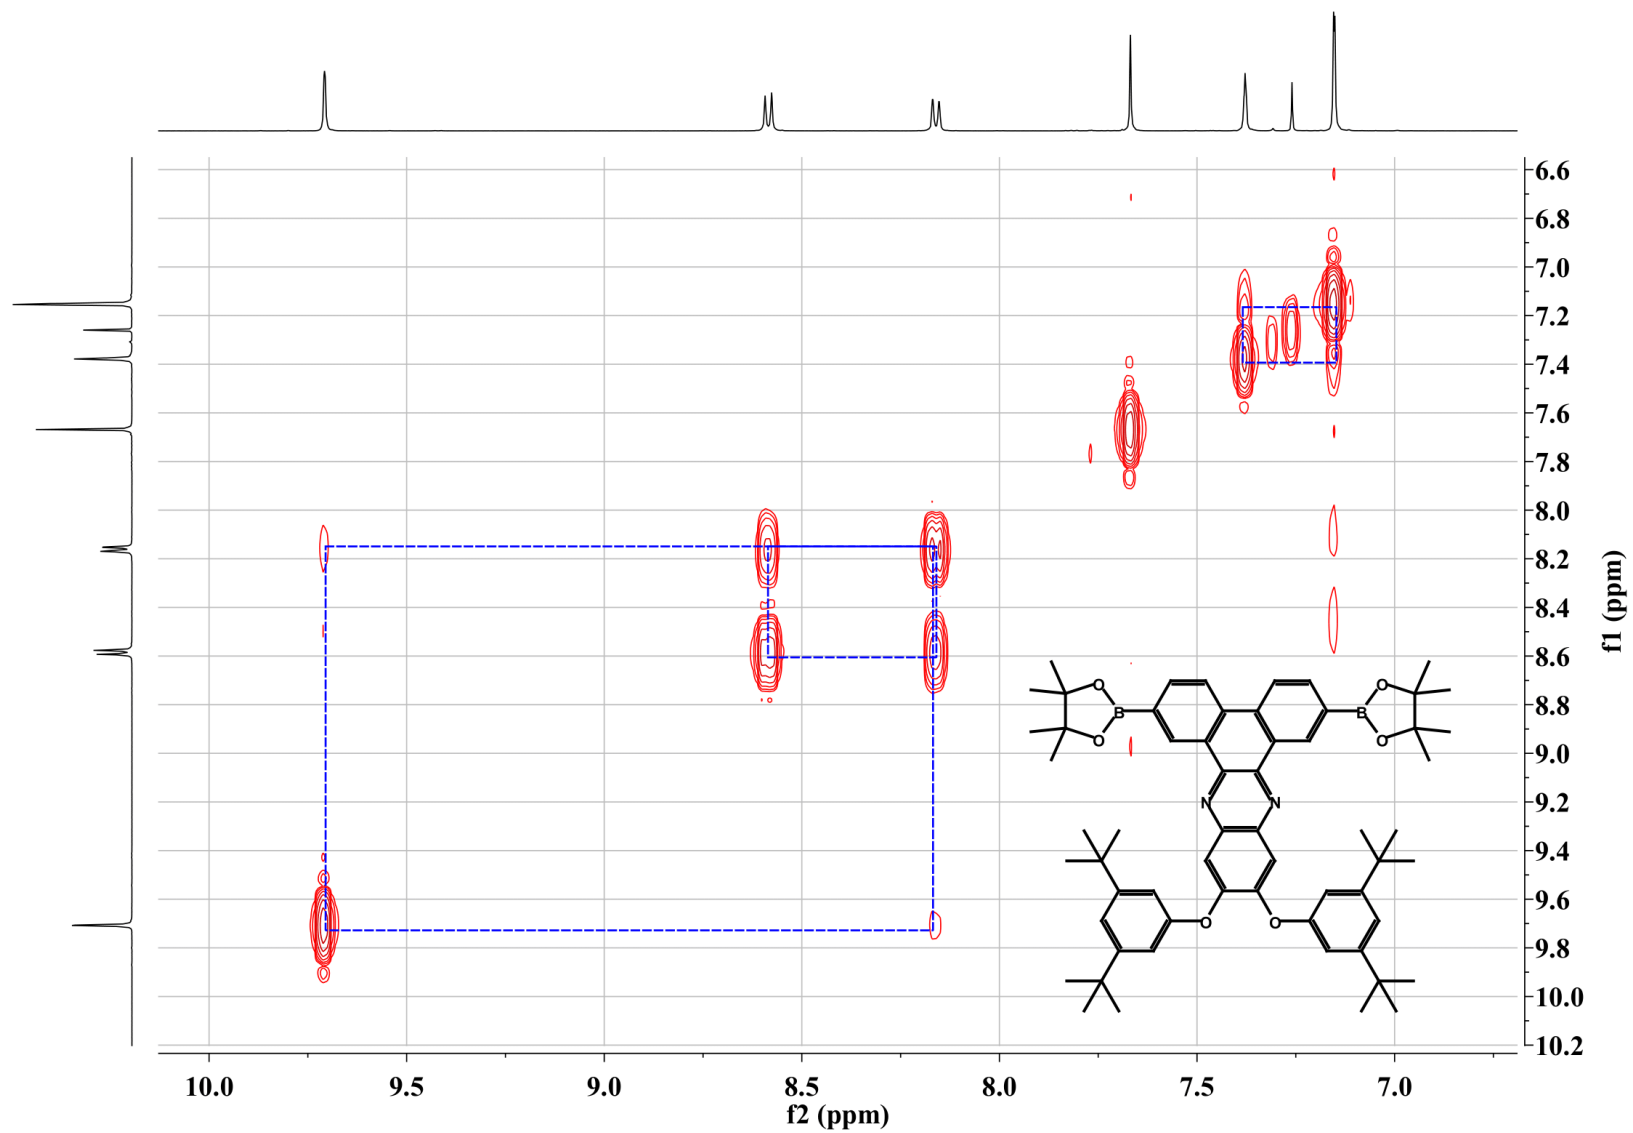

**Figure S4.** COSY NMR spectrum of **2**. Data collected in CDCl<sub>3</sub> at 20 °C.



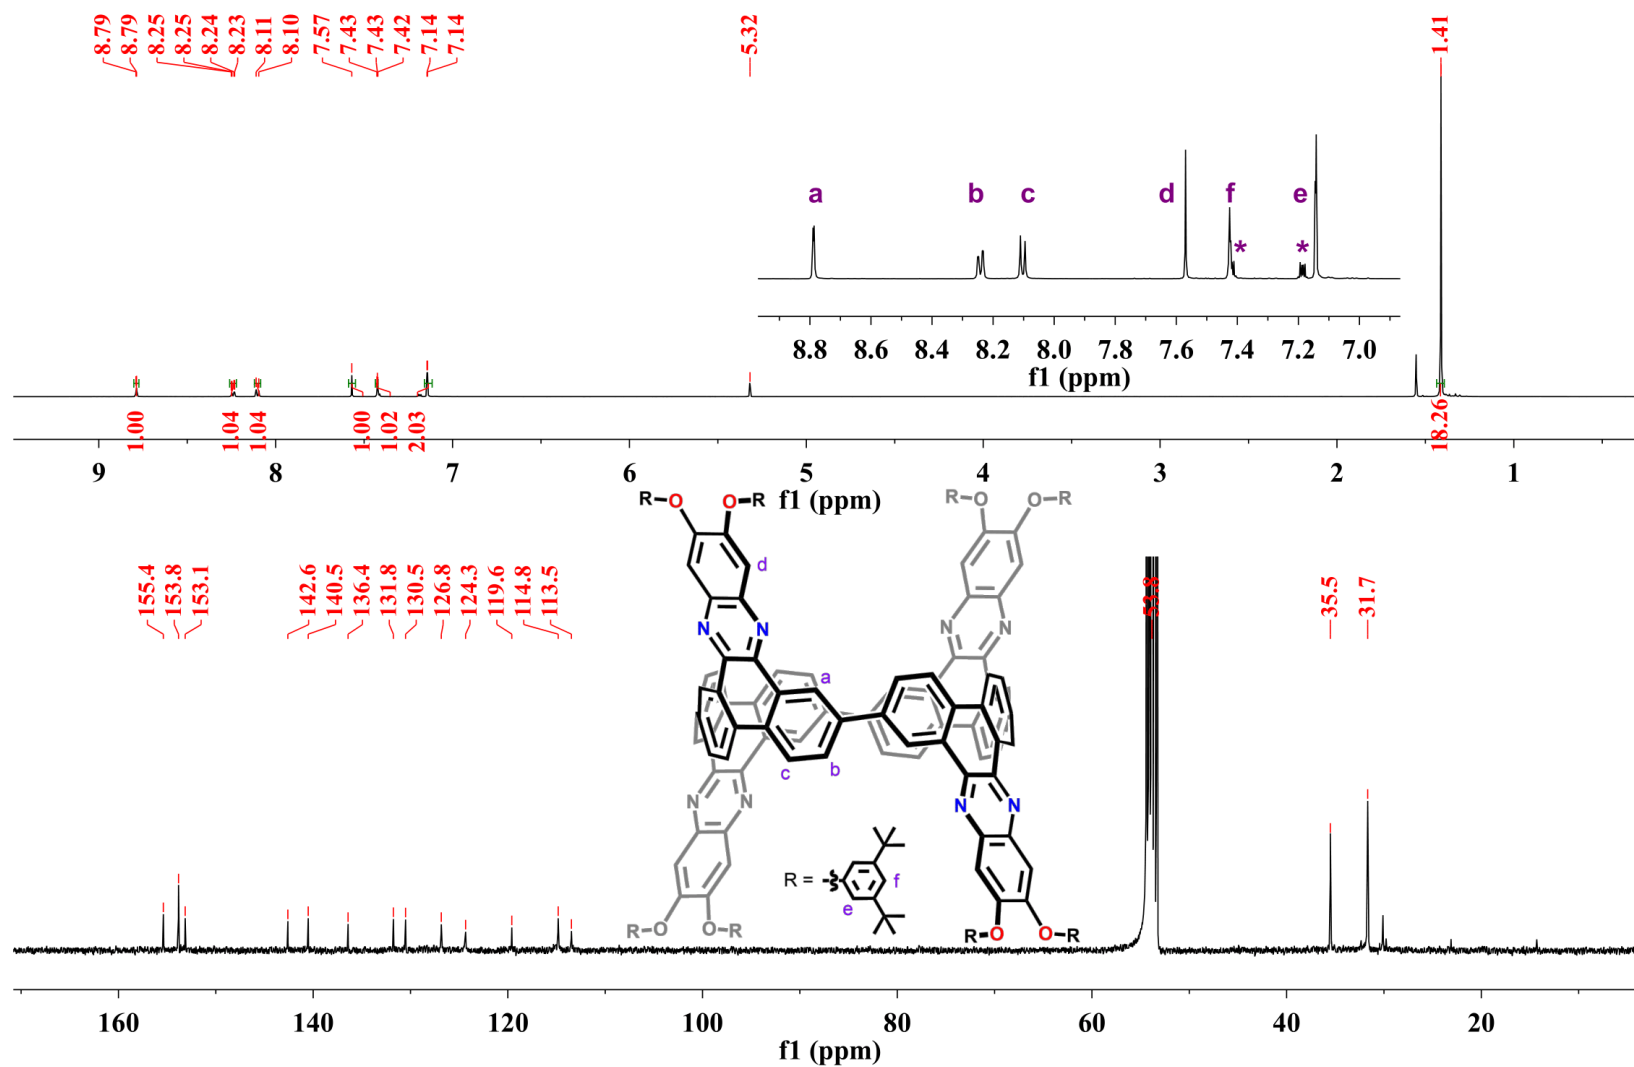

**Figure S5.**  $^1\text{H}$  and  $^{13}\text{C}$  NMR spectra of **1**. Data collected in  $\text{CD}_2\text{Cl}_2$  at 20 °C (\* = *o*DCB).

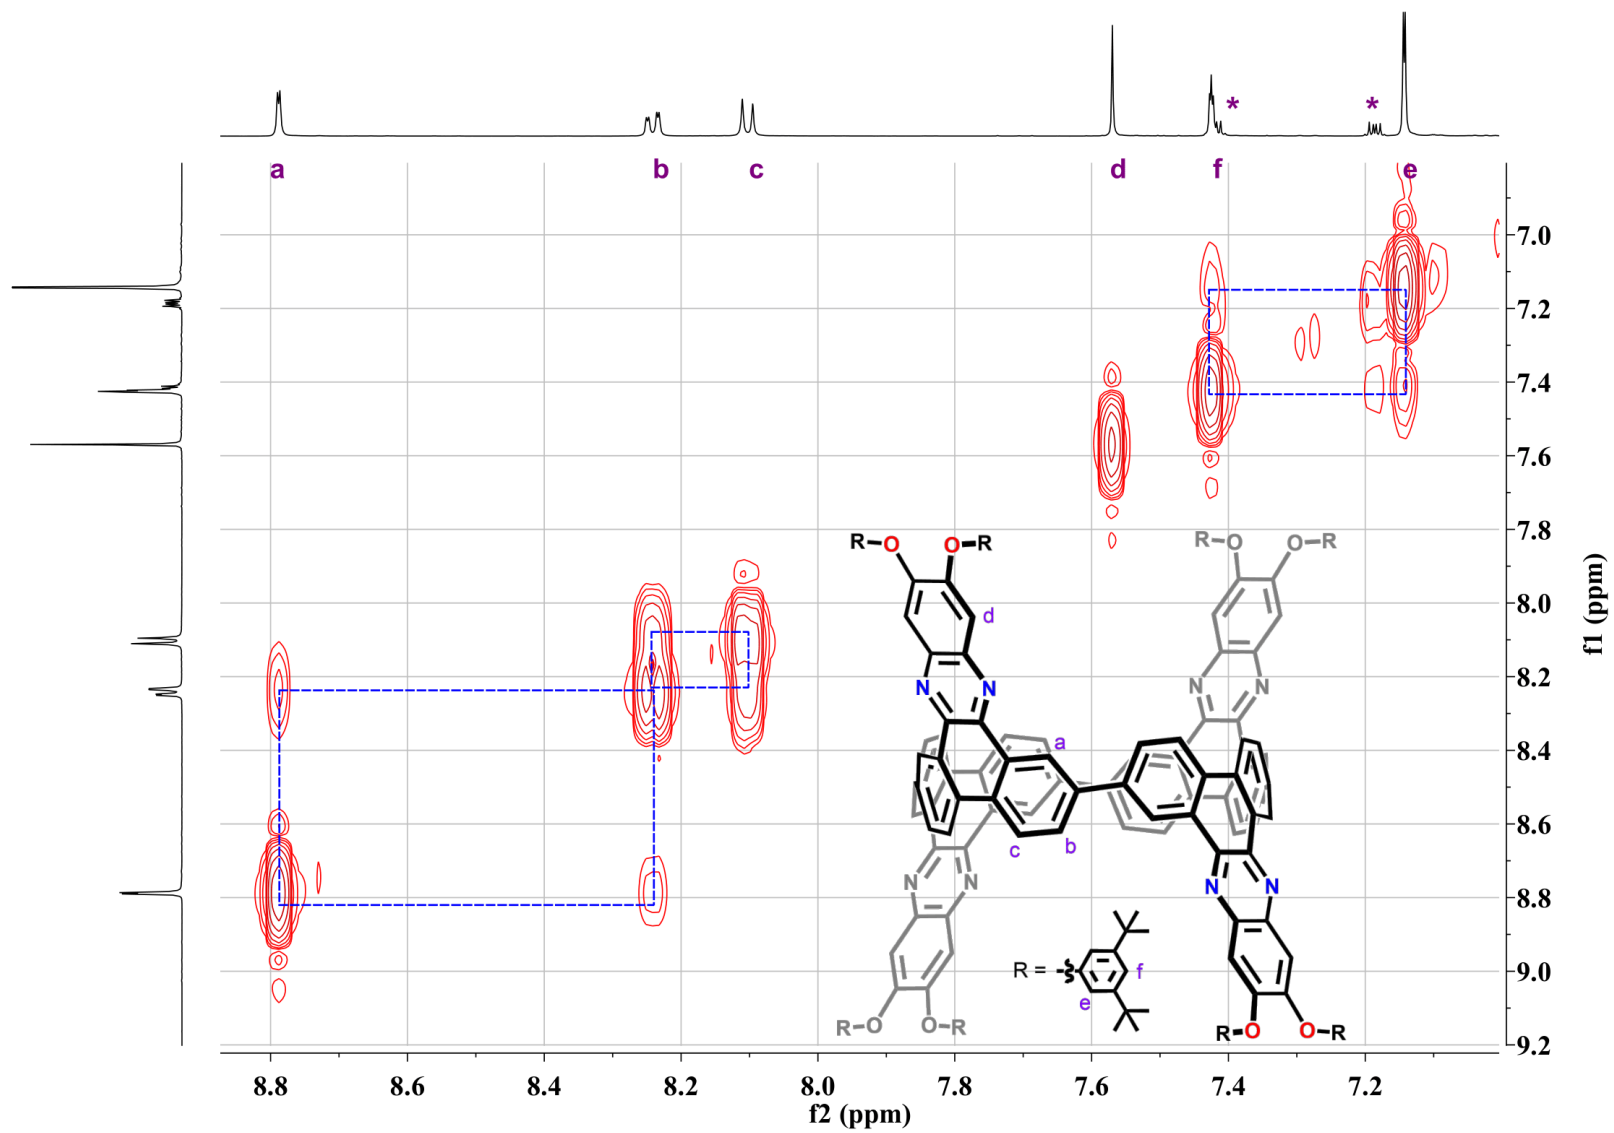

**Figure S6.** COSY NMR spectrum of **1**. Data collected in CD<sub>2</sub>Cl<sub>2</sub> at 20 °C (\* = *o*DCB).

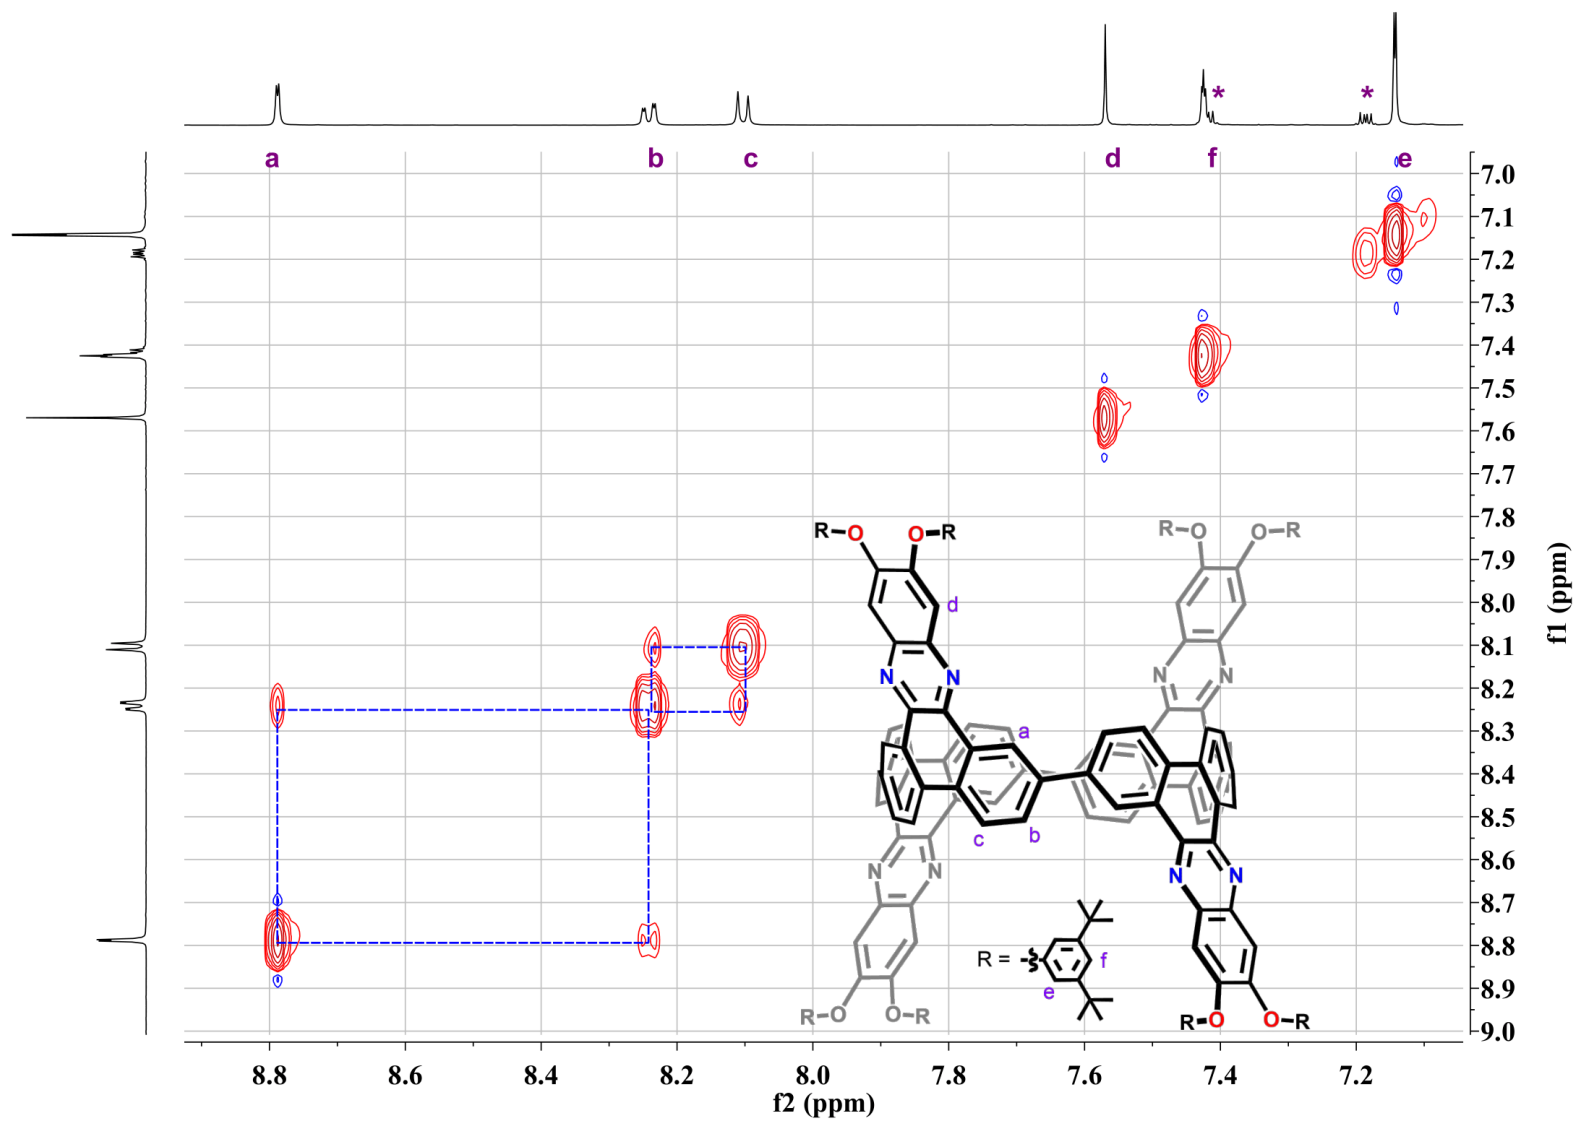

**Figure S7.** NOESY NMR spectrum of **1**. Data collected in CD<sub>2</sub>Cl<sub>2</sub> at 20 °C (\* = *o*DCB).

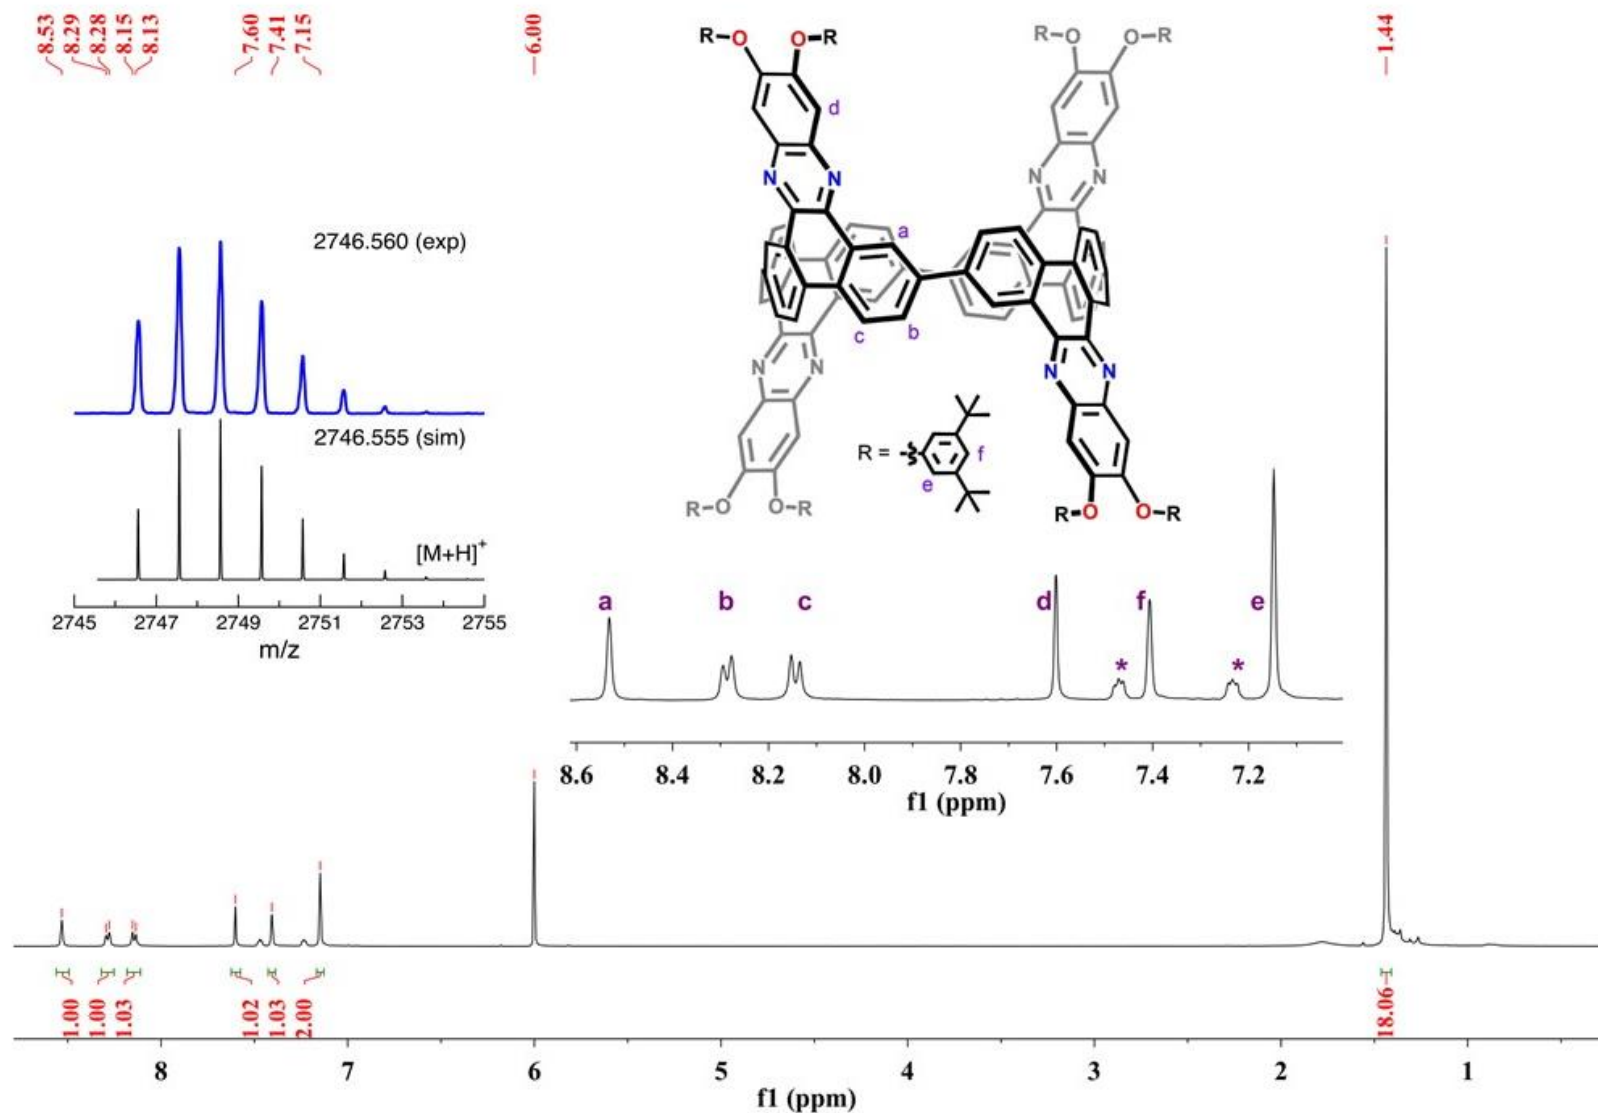

**Figure S8.**  $^1\text{H}$  NMR spectrum of **1**. Data collected in 1,1,2,2-tetrachloroethane- $d_2$  at 20 °C (\* = *o*DCB). Inset: Experimental MALDI MS molecular ion peaks of **1** (blue trace). Black trace represents simulation of  $[\text{M}+\text{H}]^+$  isotopic distribution (same as Figure 2b).

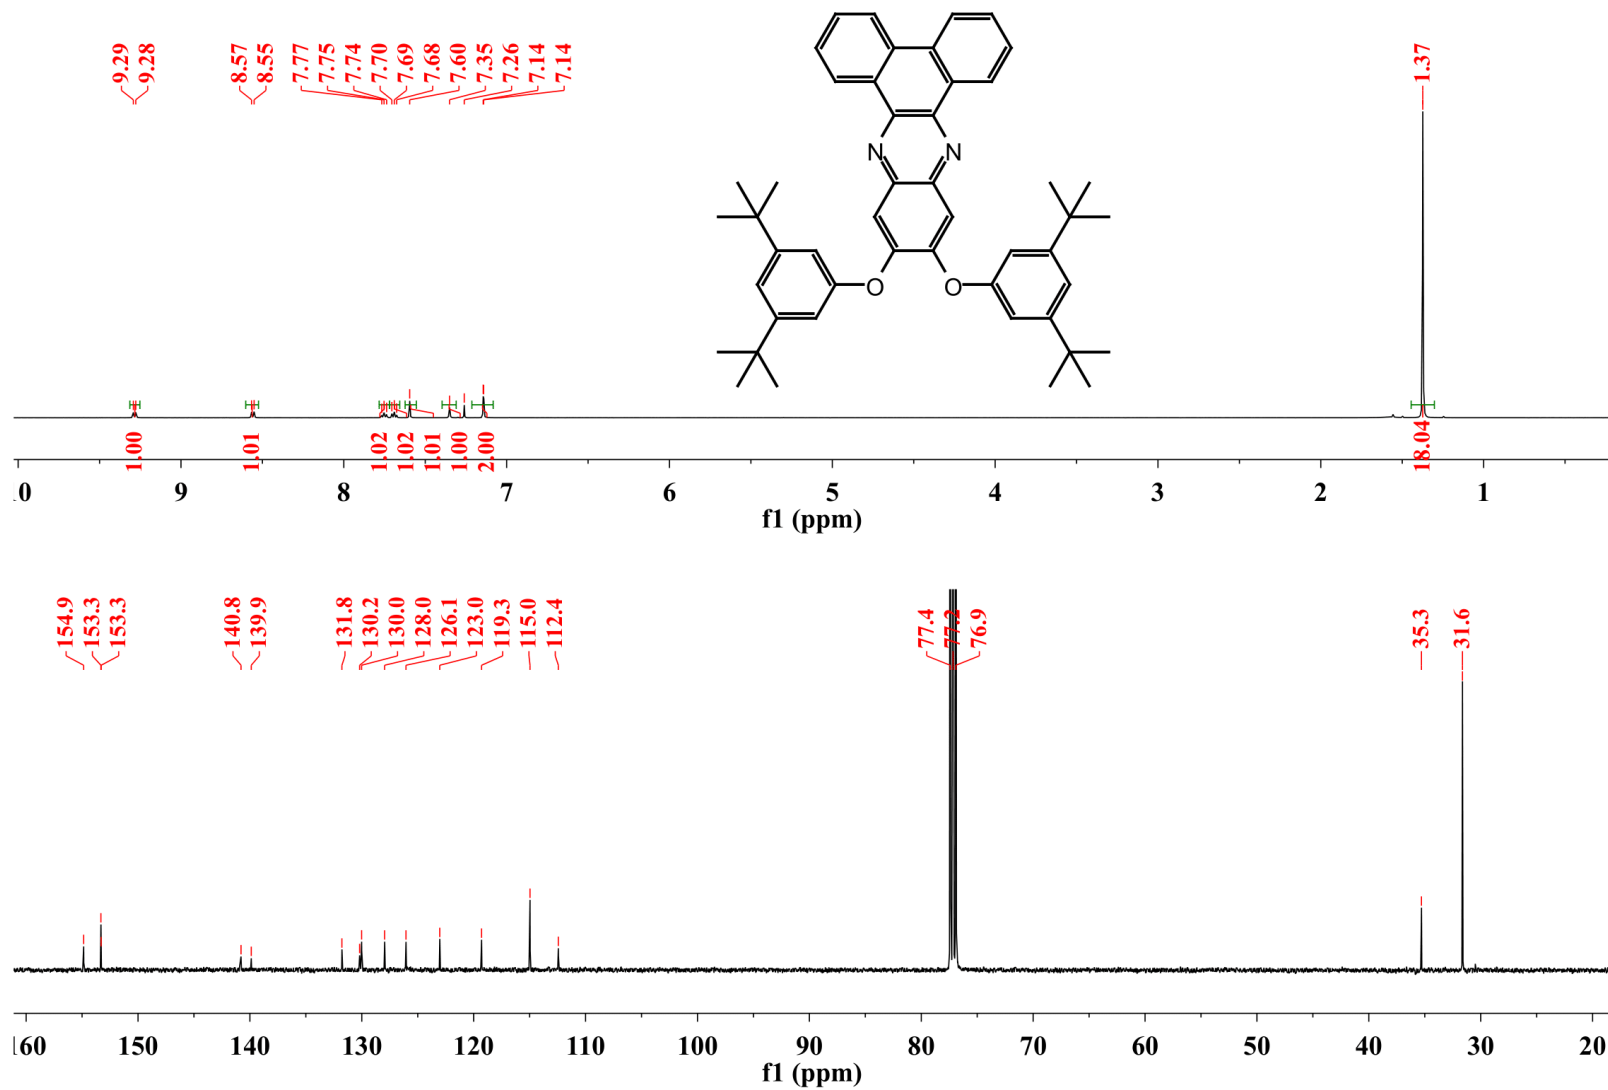

**Figure S9.**  $^1\text{H}$  and  $^{13}\text{C}$  NMR spectra of **3b**. Data collected in  $\text{CDCl}_3$  at 20 °C.

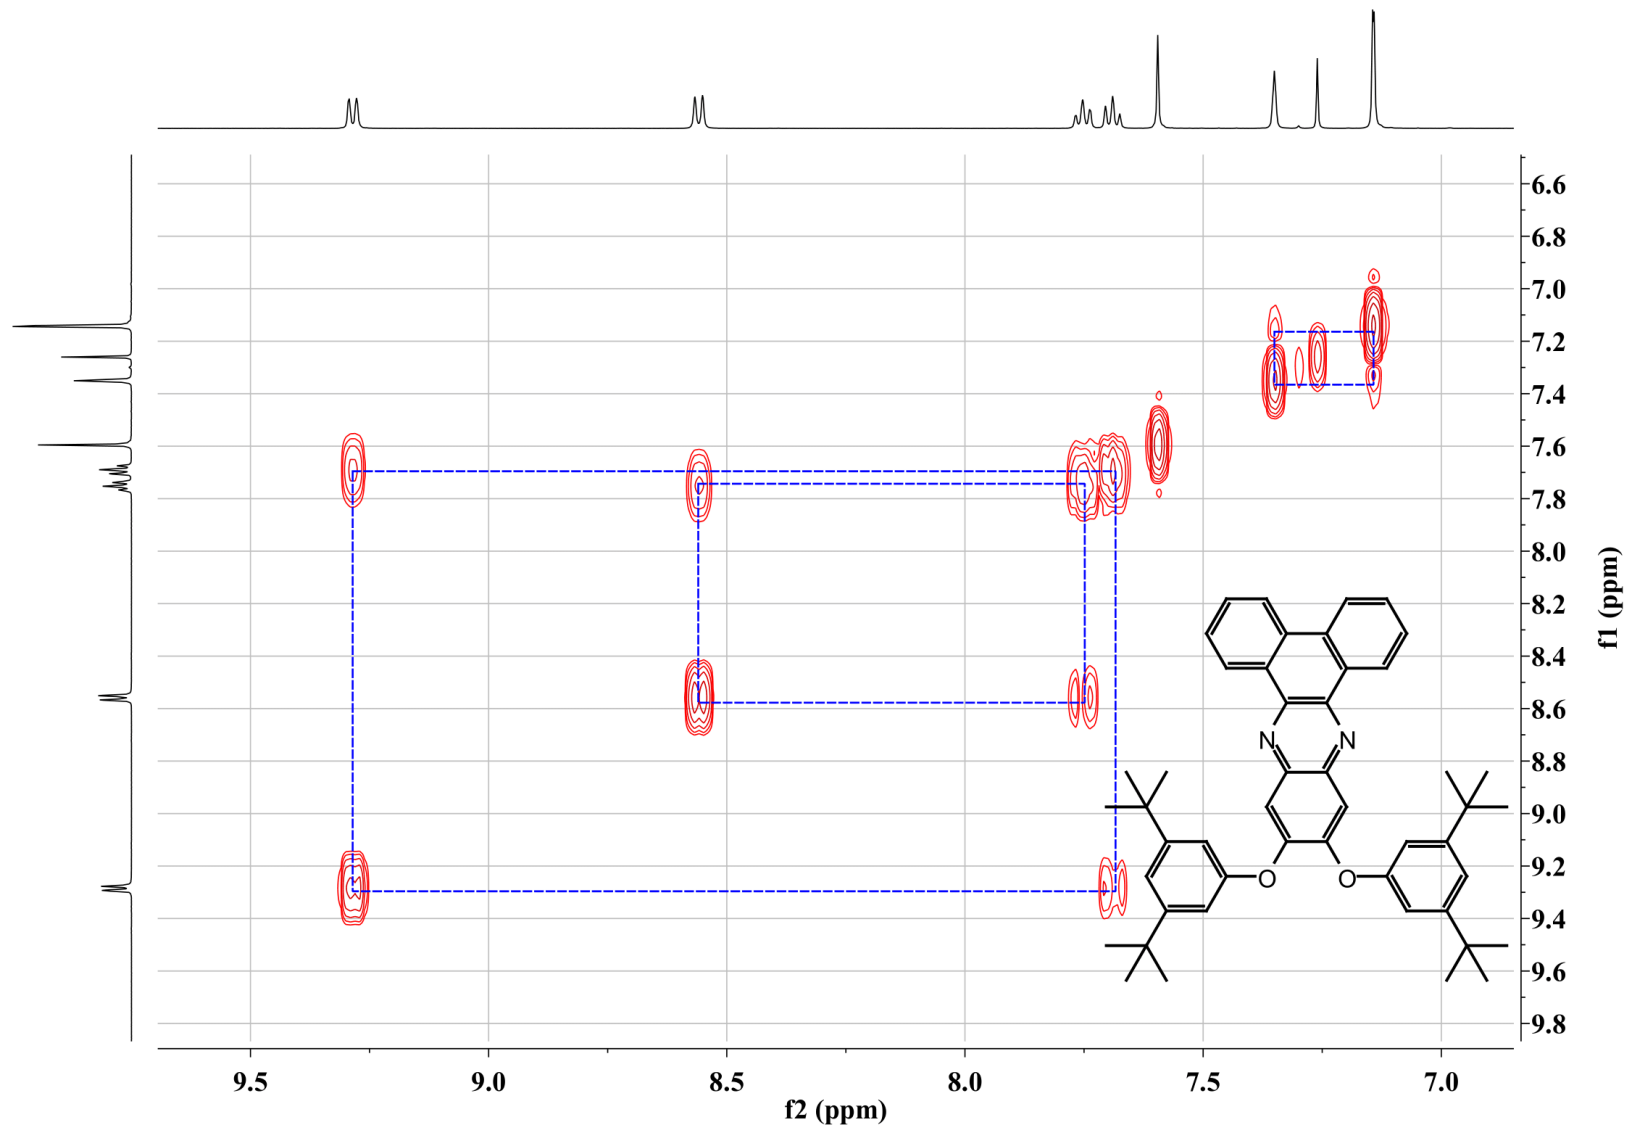

**Figure S10.** COSY NMR spectrum of **3b**. Data collected in CDCl<sub>3</sub> at 20 °C.

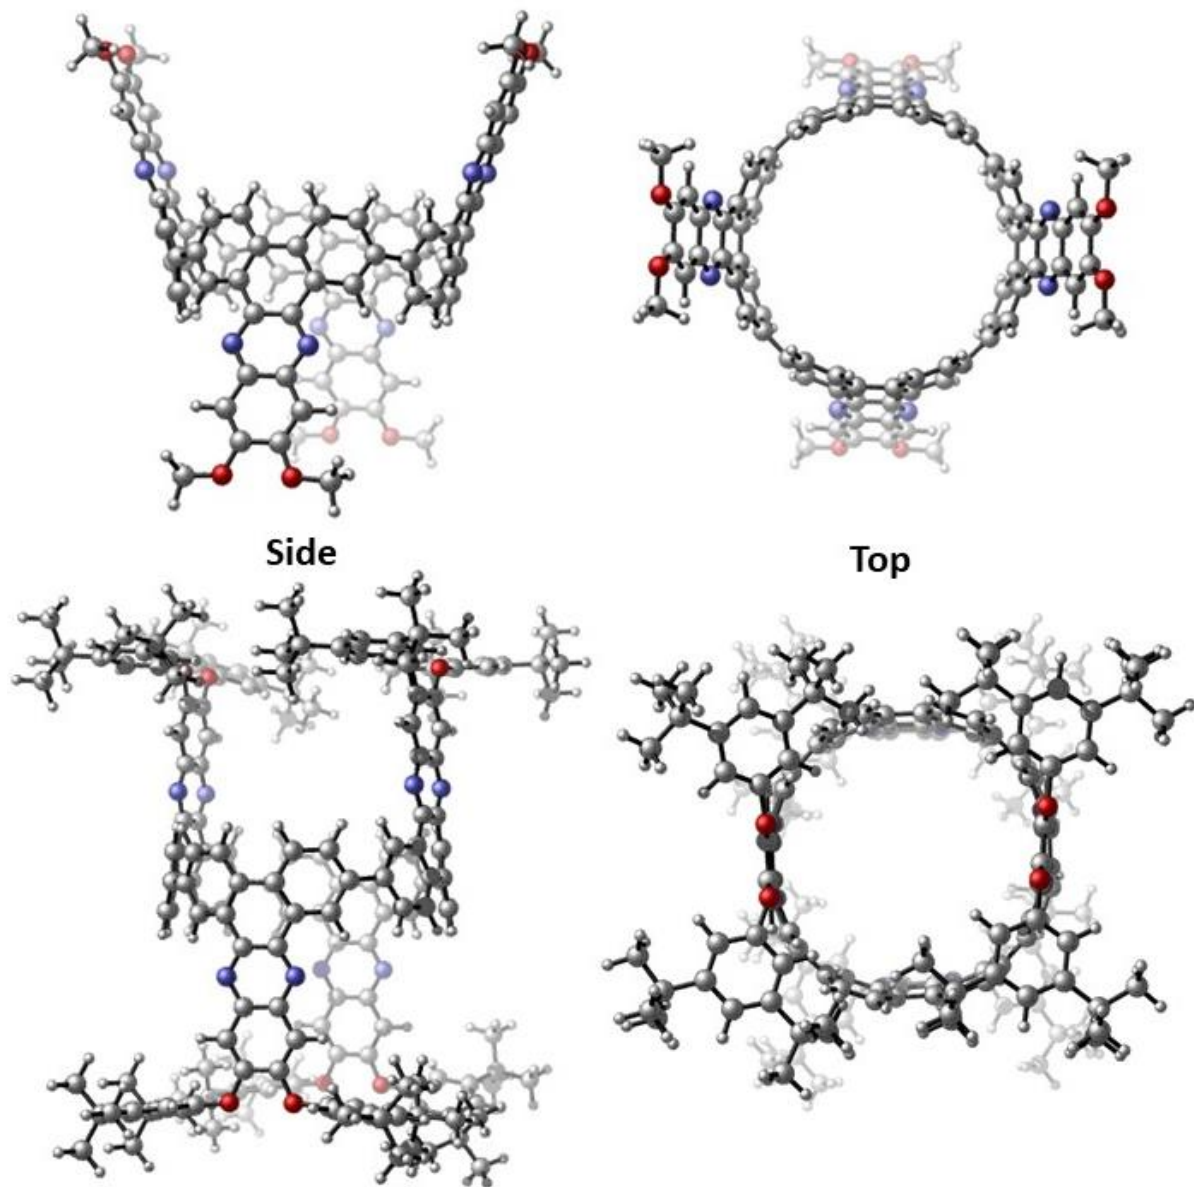

**Figure S11.** DFT optimized structure of (*top*) **1'** (R = Me) and (*bottom*) **1''** (R = 1,3-di-*tert*-butylphenyl) at the B3LYP/6-31G(d) and /3-21G(d) level of theory, respectively.

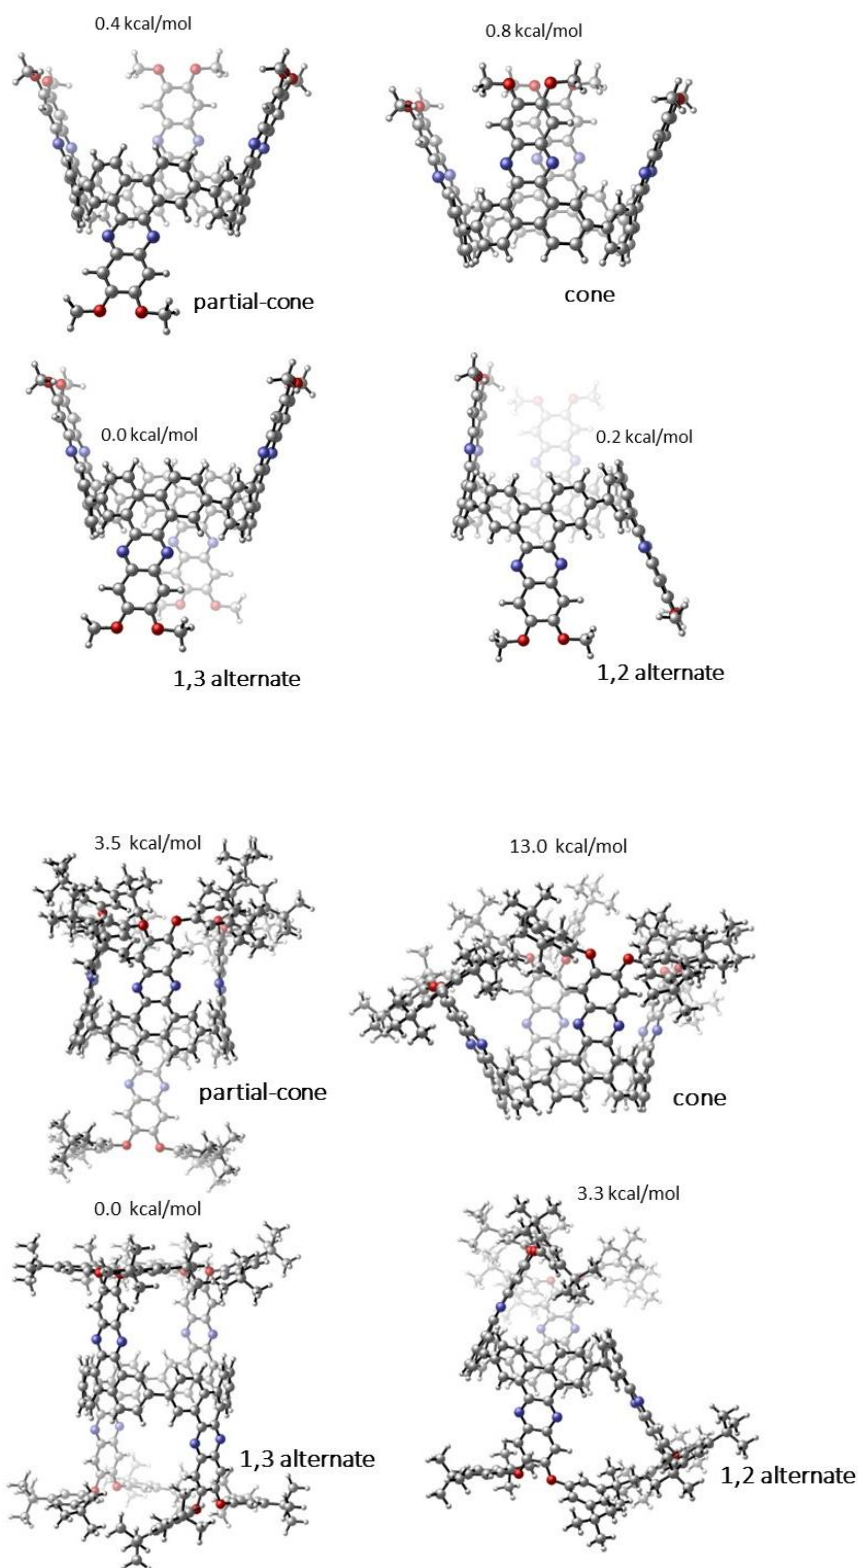

**Figure S12.** DFT conformational analysis of (*top*) **1'** (R = Me) and (*bottom*) **1''** (R = 1,3-di-*tert*-butylphenyl) at the B3LYP/6-31G(d) and /3-21G(d) level of theory, respectively.



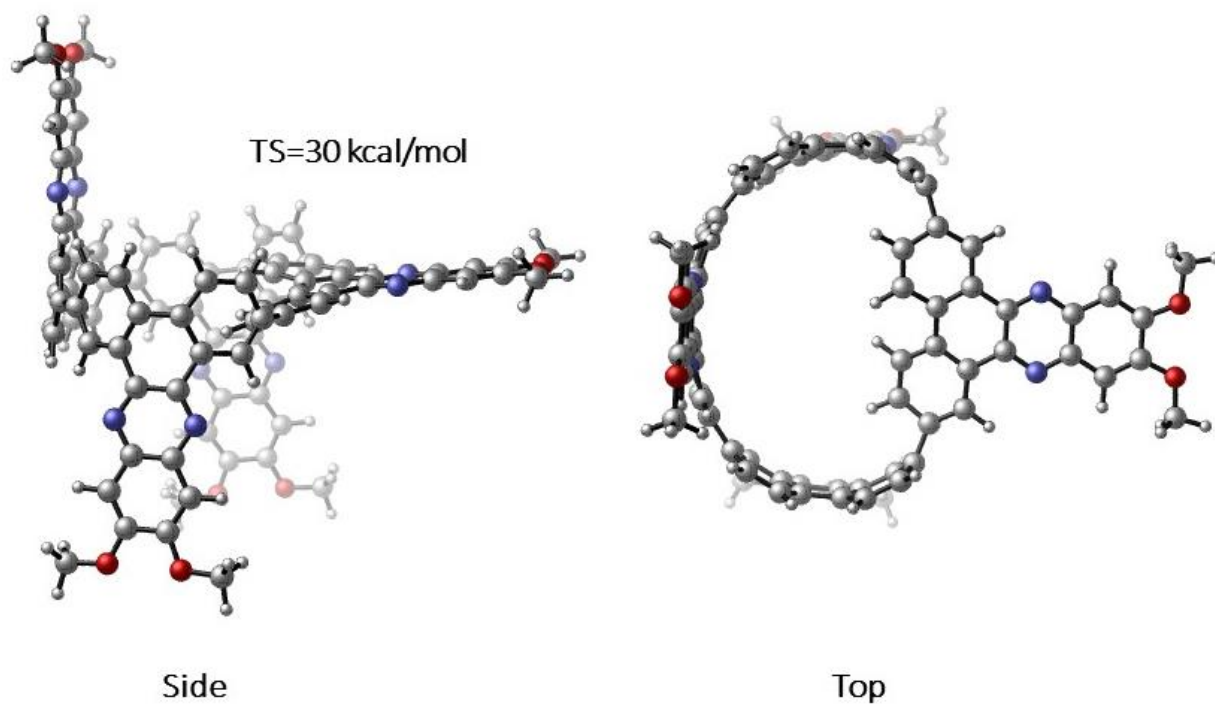

**Figure S13.** Dibenzo[*a,c*]phenazine rotational barrier in **1'** (R = Me). DFT calculations performed at the B3LYP/6-31G(d) level of theory.

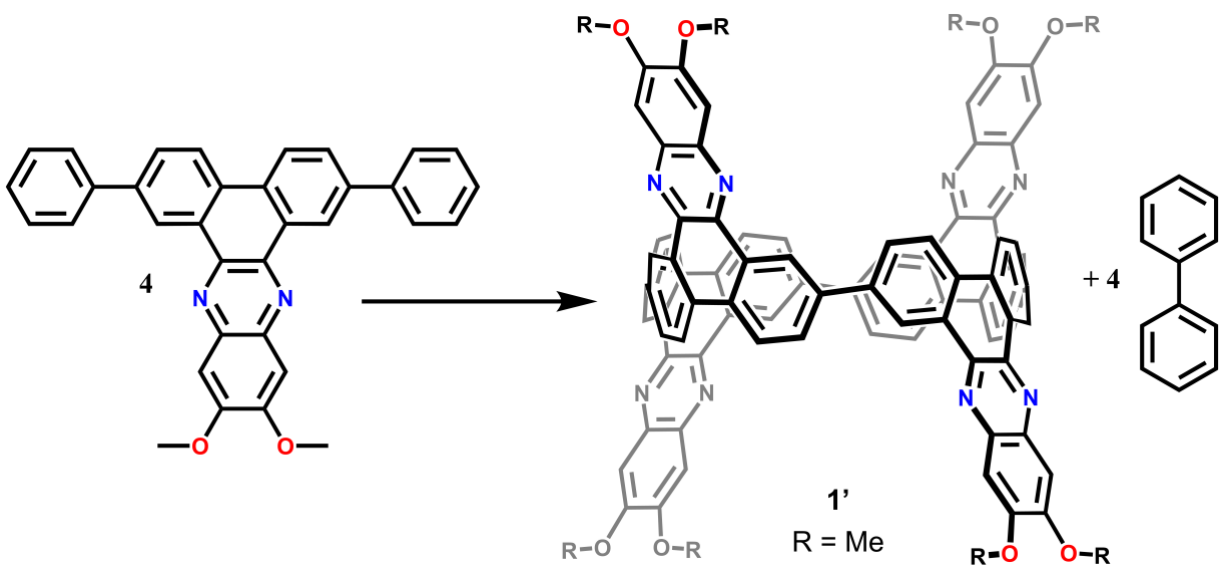

**Figure S14.** Homodesmotic reaction for the calculation of strain energy ( $\Delta H$ ) of **1'** (R = Me). Strain energy of **1'** was calculated at B3LYP/6-31G(d) level of theory to be 77.0 kcal/mol.

**Table S2.** Calculated absorption energies ( $\lambda$ , nm), oscillator strengths ( $f$ ), and main contributions with its percentages for **1'** (R = Me) at time-dependent (TD) DFT/ 6-31G\* level of theory. Except for the HOMO-to-LUMO transition, only major and intense transitions are provided. H and L stands for HOMO and LUMO, respectively.

| <b>1'</b>                       |                |       |                             |
|---------------------------------|----------------|-------|-----------------------------|
|                                 | $\lambda$ (nm) | $f$   | Major contributes           |
| <b>B3LYP-D3BJ</b>               | 527.2          | 0.000 | H $\rightarrow$ L (96%)     |
|                                 | 474.0          | 0.130 | H $\rightarrow$ L+1 (94%)   |
|                                 | 406.2          | 0.698 | H-1 $\rightarrow$ L (72%)   |
|                                 | 406.2          | 0.698 | H-2 $\rightarrow$ L (72%)   |
|                                 | 393.1          | 1.366 | H-6 $\rightarrow$ L (58%)   |
| <b>CAM-B3LYP-D3BJ</b>           | 395.6          | 0.000 | H $\rightarrow$ L (71%)     |
|                                 | 352.9          | 1.025 | H $\rightarrow$ L+1 (43%)   |
|                                 | 352.9          | 1.026 | H $\rightarrow$ L+2 (43%)   |
| <b><math>\omega</math>B97XD</b> | 344.3          | 0.000 | H $\rightarrow$ L (62%)     |
|                                 | 451.3          | 1.170 | H-4 $\rightarrow$ L (10%)   |
|                                 | 451.2          | 1.180 | H-3 $\rightarrow$ L+1 (21%) |

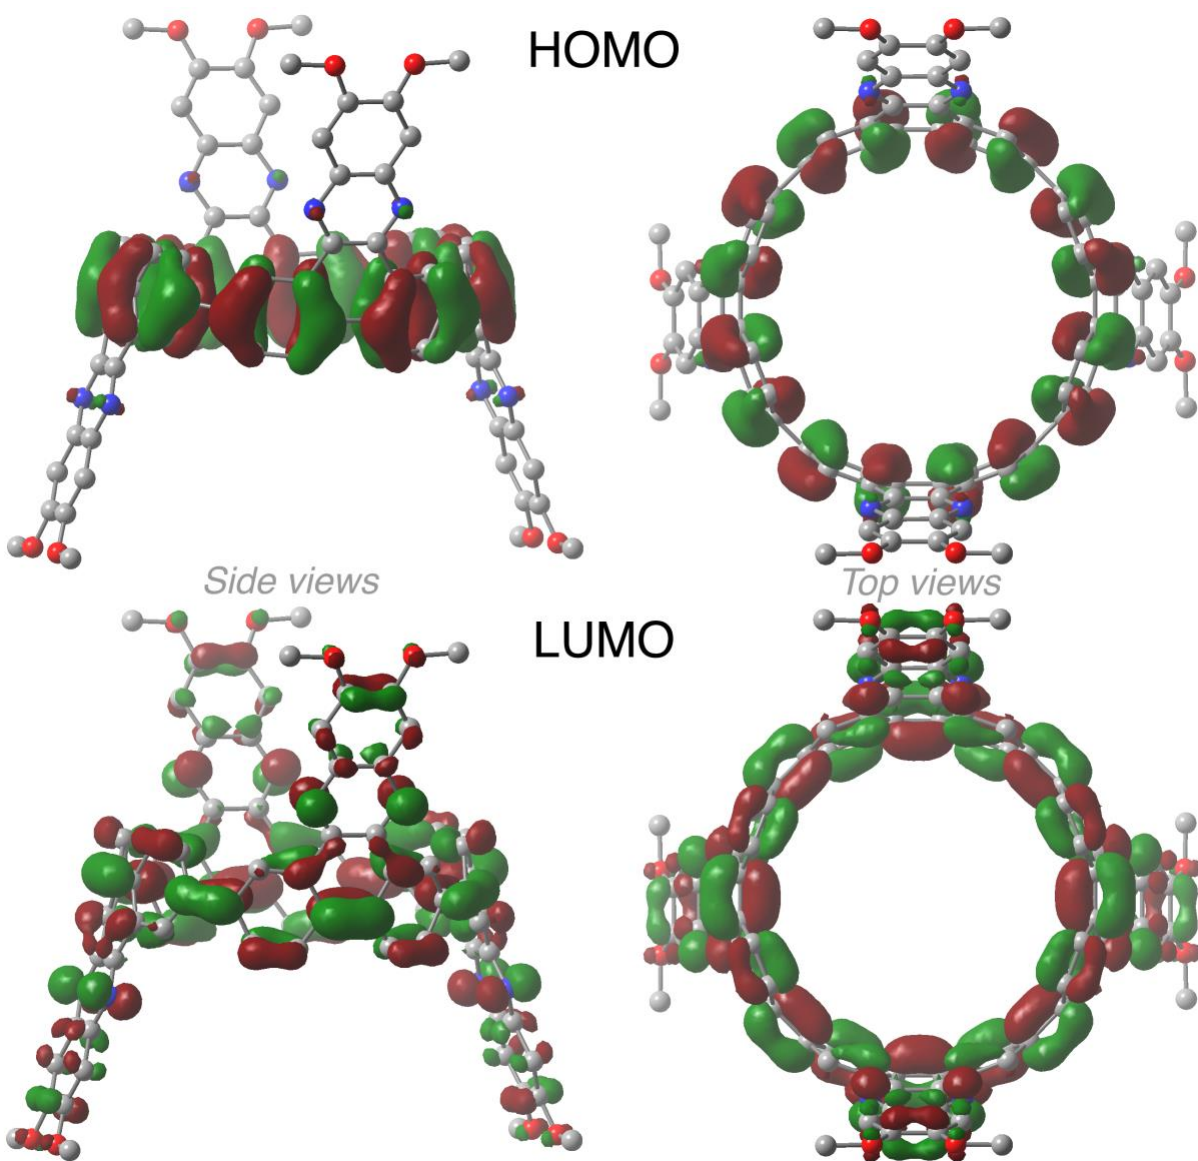

**Figure S15.** HOMO and LUMO ( $\pm 0.02$  au) of **1'** (R = Me) calculated by DFT at the B3LYP/6-31G(d) level of theory

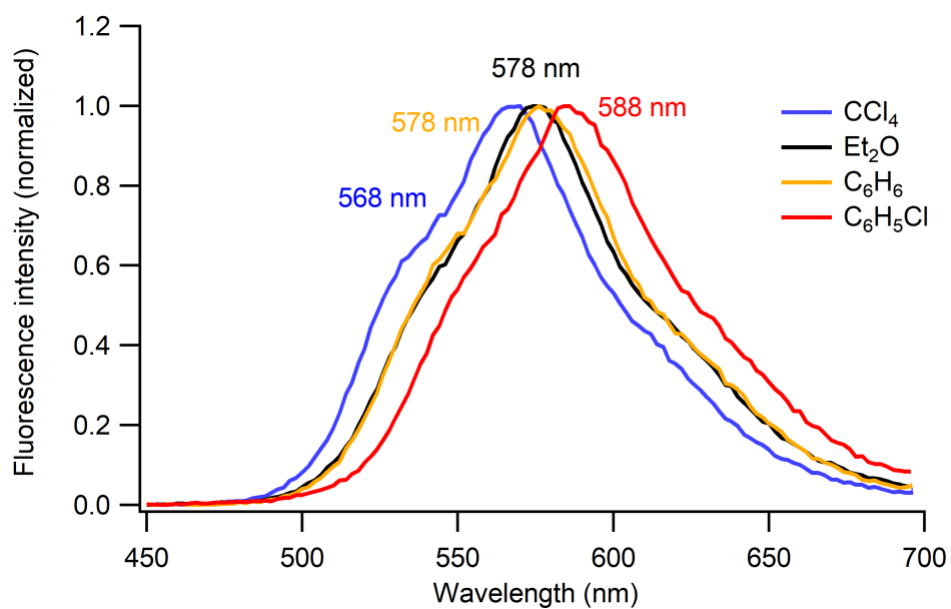

**Figure S16.** Emission profile of **1** in a variety of solvents. Peak maximum is indicated by the numbers in the plot and color-coded according to solvent. The samples were excited at 350 nm. Dielectric constants:  $\text{CCl}_4$ , 2.24;  $\text{Et}_2\text{O}$ , 4.267;  $\text{C}_6\text{H}_6$ , 2.28;  $\text{C}_6\text{H}_5\text{Cl}$ , 5.69; and  $\text{CH}_2\text{Cl}_2$ , 9.08 (this last solvent is in the main text).<sup>18</sup>

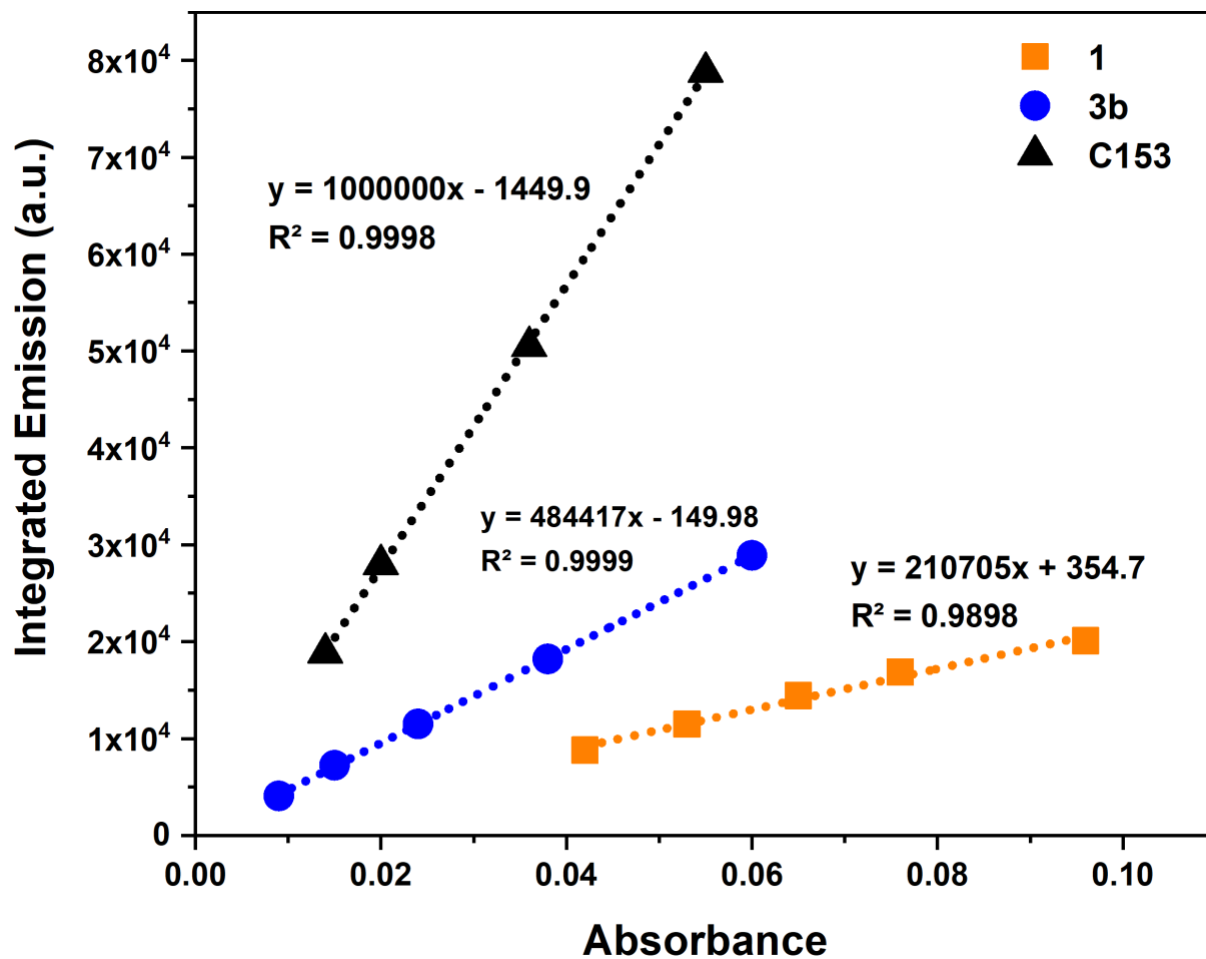

*Figure S17.* Linear plots used to obtain the gradient values for quantum yield determination of **1** and **3b**. Quantum yield determination equation and details are provided in the experimental section.

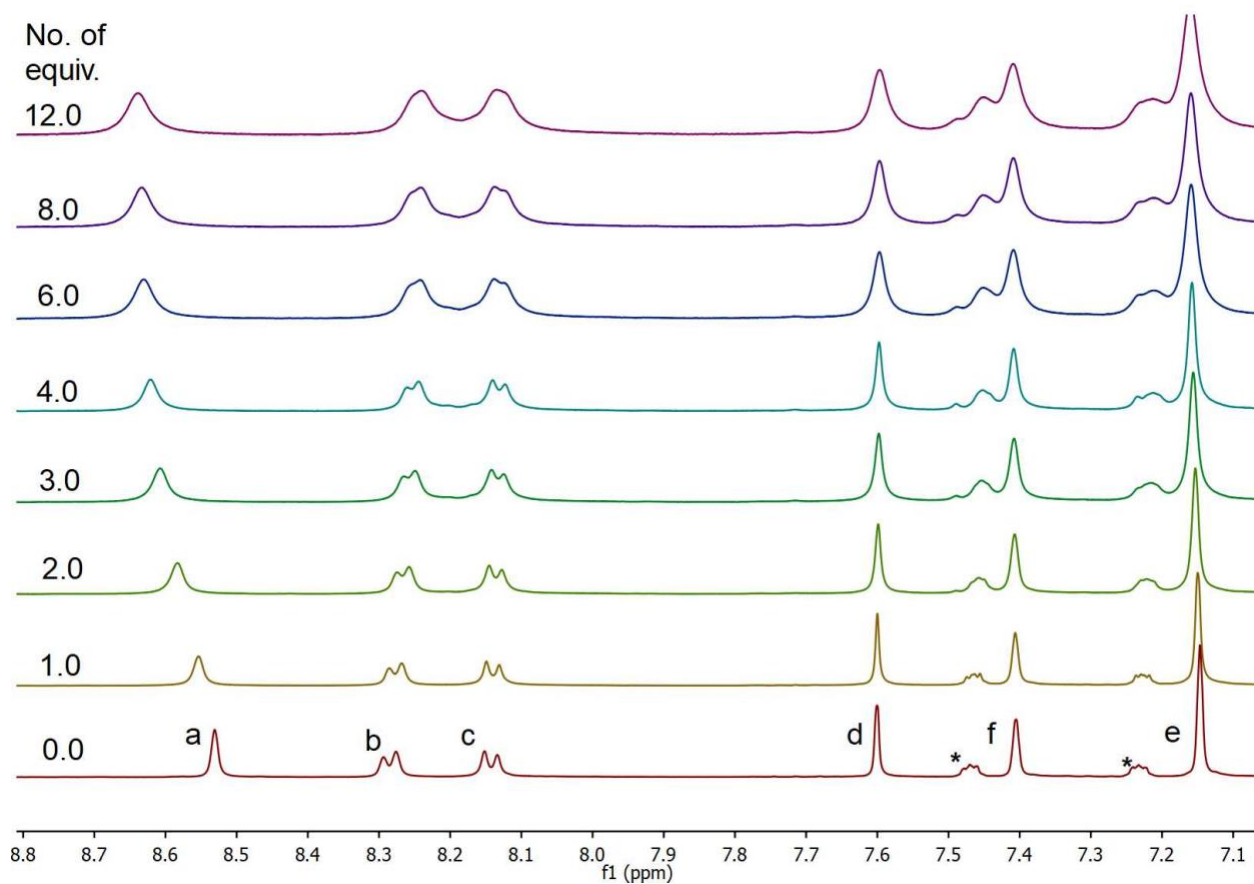

**Figure S18.**  $^1\text{H}$  NMR titration spectra (500 MHz, 298 K) of  $\text{C}_{60}$  into **1** (1 mM) in 1,1,2,2-tetrachloroethane- $d_2$ . The number of  $\text{C}_{60}$  equivalents relative to **1** are indicated on the left-hand side of the stacked plot (\* = *o*DCB).

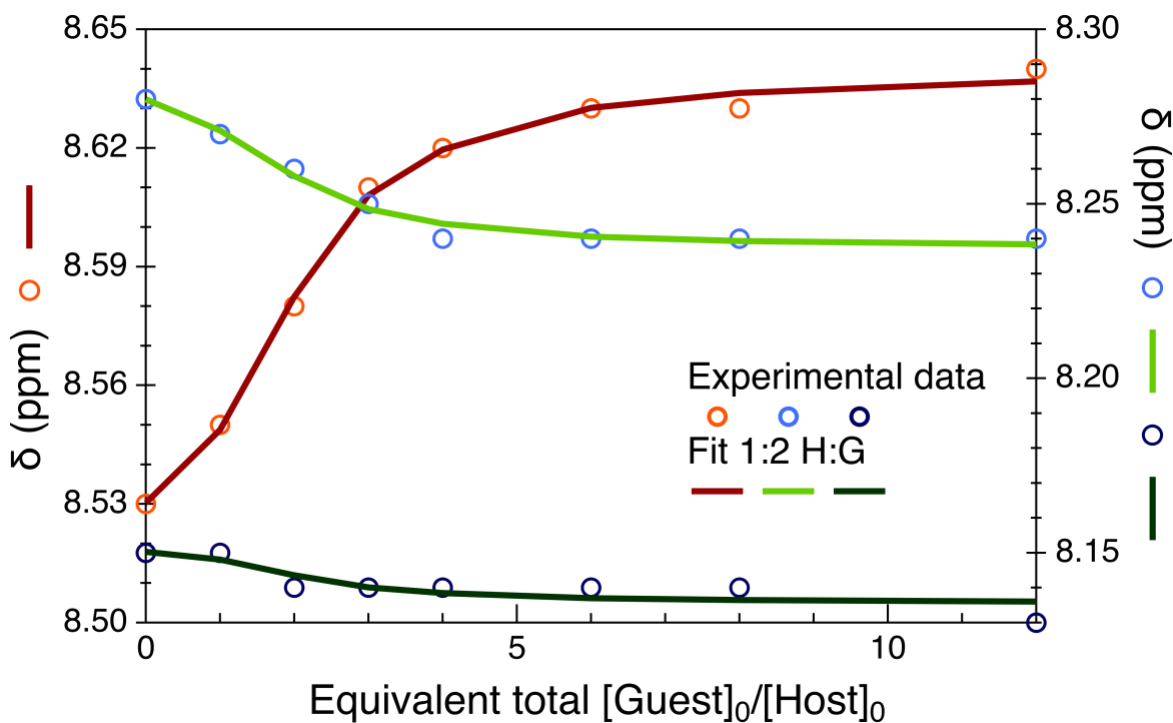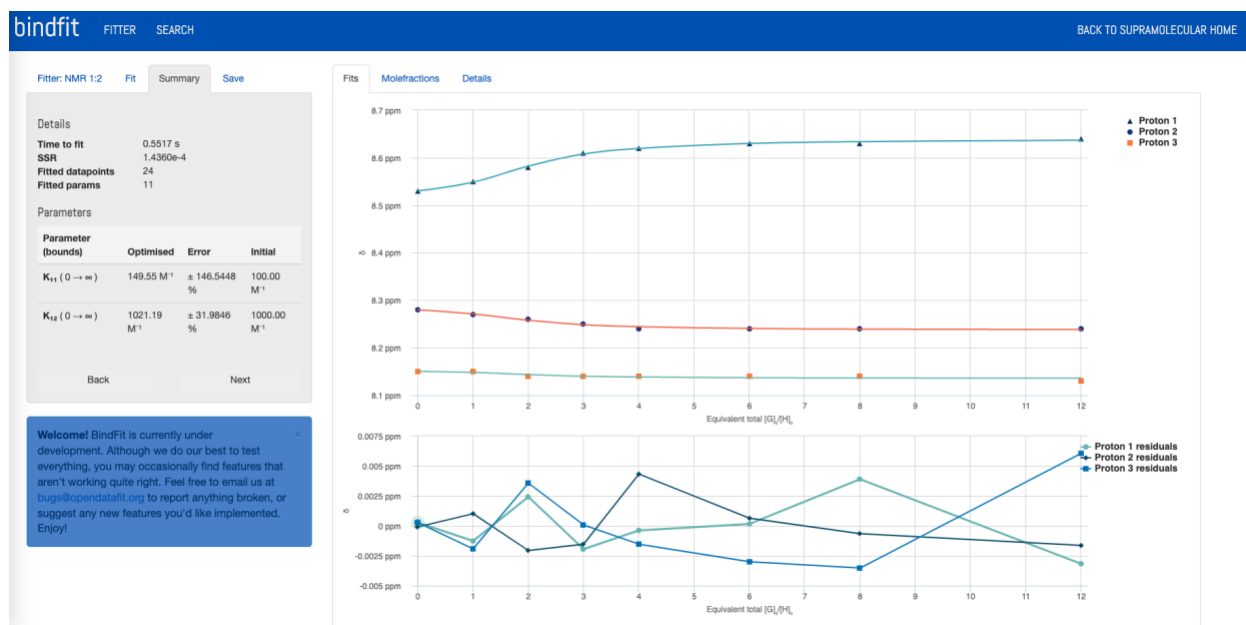

**Figure S19.** Non-linear curve fitting of <sup>1</sup>H NMR resonance “a”, “b” and “c” of **1** upon titration with C<sub>60</sub>. Experimental data is shown as open circles, while the fit to a 1:2 H:G model is shown as continuous traces. Data was fit using Bindfit.<sup>19</sup> Fitting to 1:2 H:G model provides the following parameters: L-BFGS-B,  $K_1 = 149 \text{ M}^{-1}$  ( $\pm 146\%$ ),  $K_2 = 1021 \text{ M}^{-1}$  ( $\pm 32\%$ ).



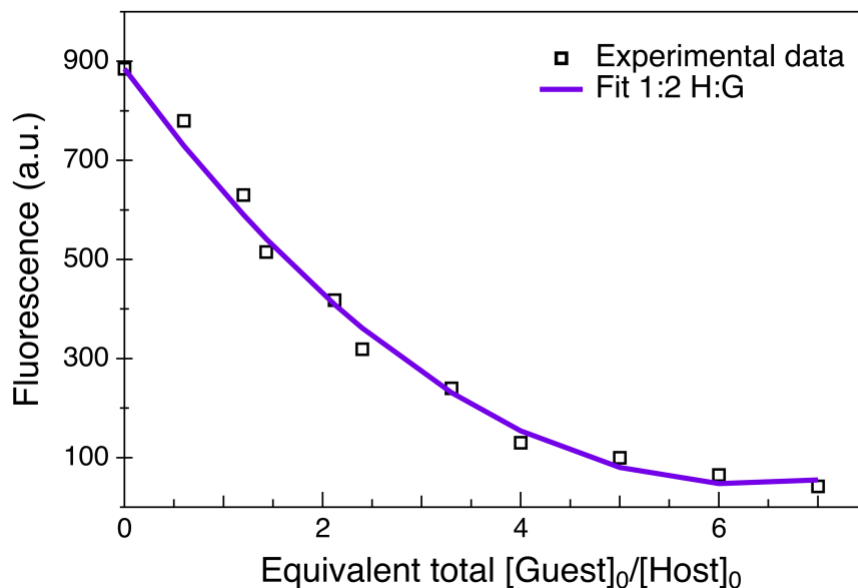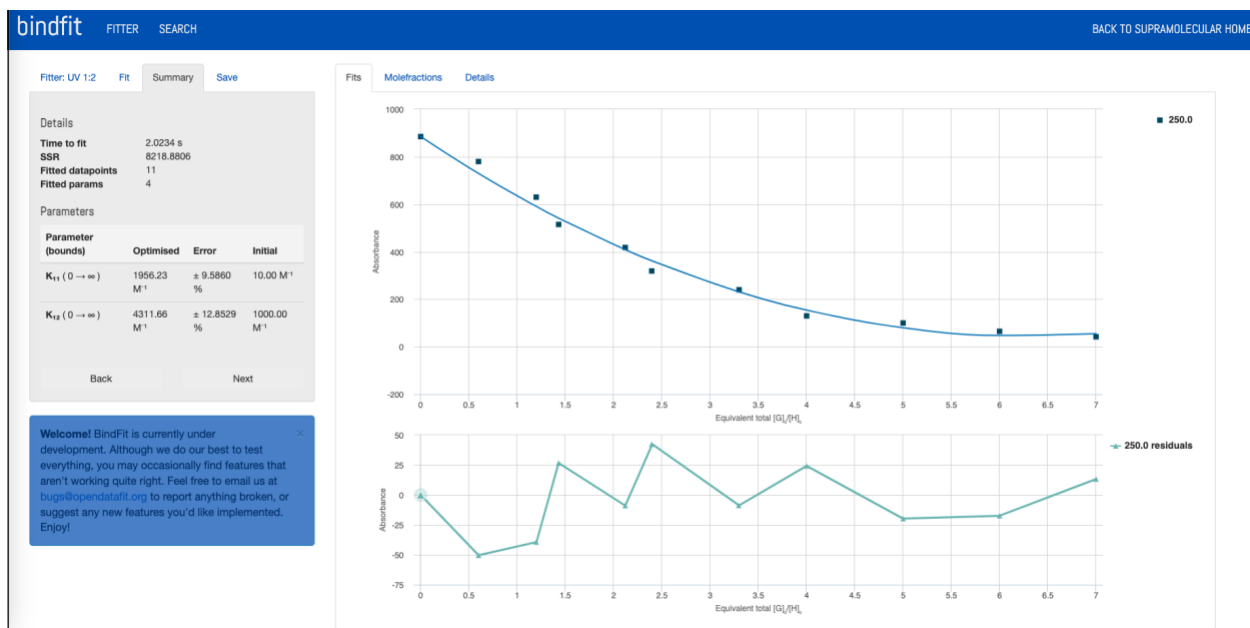

**Figure S20.** Non-linear curve fitting of fluorescence quenching titration of **1** upon addition of C<sub>60</sub>. Experimental data is shown in the black open squares, while the fit to a 1:2 H:G model is shown in purple. Data was fit using Bindfit. For 1:2 H:G model: L-BFGS-B,  $K_1 = 1956 \text{ M}^{-1}$  ( $\pm 9.6\%$ ),  $K_2 = 4311 \text{ M}^{-1}$  ( $\pm 12.8\%$ ).

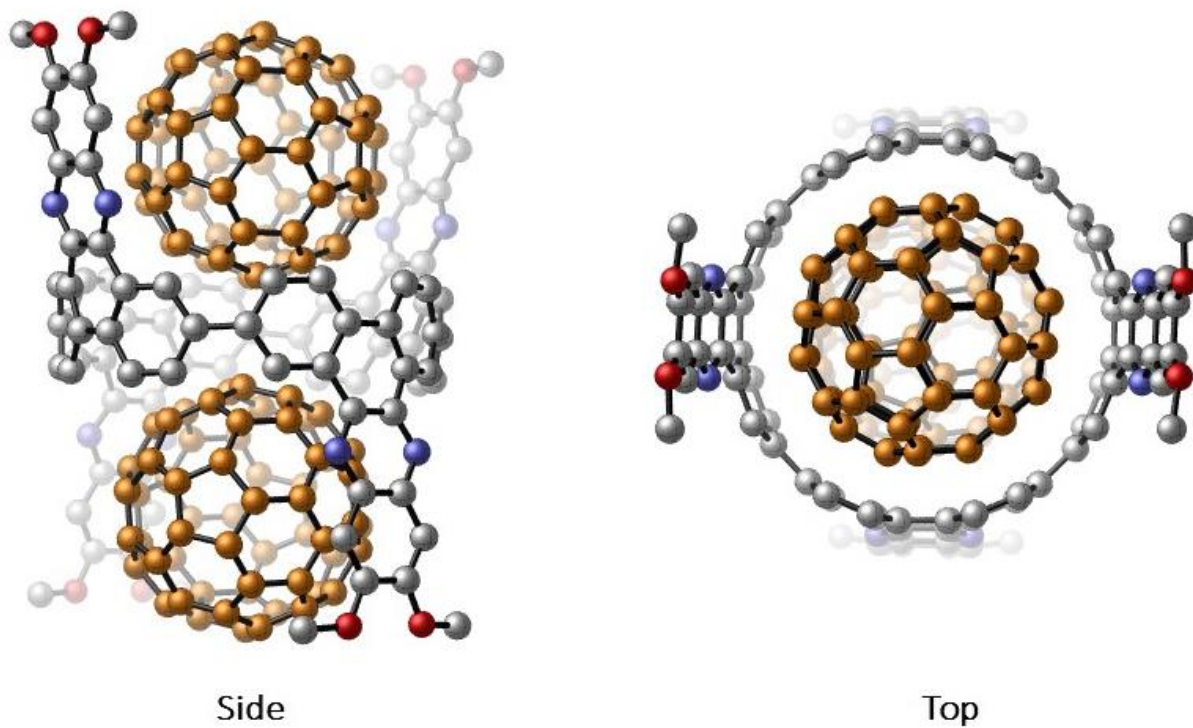

**Figure S21.** DFT optimized structure of  $[(C_{60})_2 c1']$  at the B3LYP/6-31G(d) level of theory. Hydrogens are omitted for clarity.

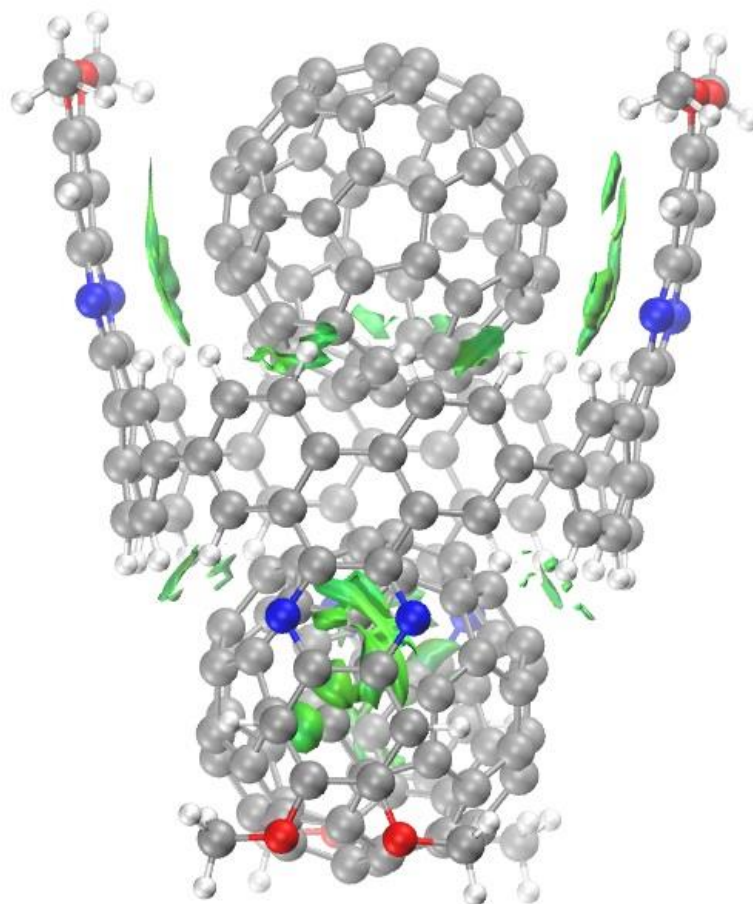

**Figure S22.**  $\text{Sign}(\lambda_2)\rho$  colored IGMH of  $\delta g^{\text{inter}} = 0.003$  a.u. isosurfaces showing non-covalent interactions in  $[(\text{C}_{60})_2\text{C}1']$ .

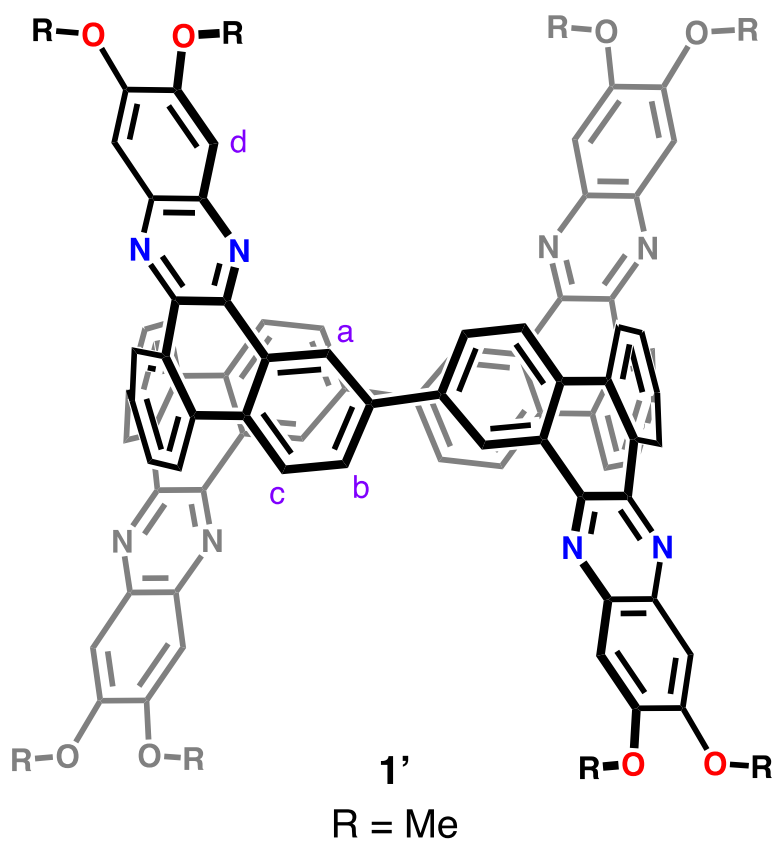

**Table S3.** DFT calculated  $^1\text{H}$  NMR data of **1'** (R = Me) using DFT/6-31G\*+PCM(CH<sub>2</sub>Cl<sub>2</sub>) level of theory.

|   | B3LYP | $\omega$ B97XD | Exp.<br>(CD <sub>2</sub> Cl <sub>2</sub> ) |
|---|-------|----------------|--------------------------------------------|
| a | 9.68  | 9.06           | 8.77                                       |
| b | 8.58  | 7.82           | 8.24                                       |
| c | 8.28  | 7.37           | 8.10                                       |
| d | 7.65  | 6.92           | 7.57                                       |

## Cartesian Coordinates of optimized molecules

(B3LYP/6-31G\* or 3-21G\*)

1' (1,3-alternate, R = Me)

|                                              |                             |
|----------------------------------------------|-----------------------------|
| Zero-point correction=                       | 1.238311 (Hartree/Particle) |
| Thermal correction to Energy=                | 1.318127                    |
| Thermal correction to Enthalpy=              | 1.319071                    |
| Thermal correction to Gibbs Free Energy=     | 1.119914                    |
| Sum of electronic and zero-point Energies=   | -4425.685982                |
| Sum of electronic and thermal Energies=      | -4425.606066                |
| Sum of electronic and thermal Enthalpies=    | -4425.605522                |
| Sum of electronic and thermal Free Energies= | -4425.803979                |

|   |             |             |             |
|---|-------------|-------------|-------------|
| C | -9.66610200 | 6.00154400  | 3.24437100  |
| C | -9.29404600 | 5.47484000  | 2.03029500  |
| C | -8.92888100 | 4.10377200  | 1.91819100  |
| C | -8.95004300 | 3.27398800  | 3.08539400  |
| C | -9.33598700 | 3.83671500  | 4.33443500  |
| C | -9.68761200 | 5.16265900  | 4.42431000  |
| C | -3.40855700 | -9.66000500 | 2.47299300  |
| C | -4.04713600 | -8.48648200 | 2.79687800  |
| C | -3.29744900 | -7.32066900 | 3.12027200  |
| C | -1.86648900 | -7.37920500 | 3.10354200  |
| C | -1.22228200 | -8.60197900 | 2.76362500  |
| C | -1.96195900 | -9.71911000 | 2.45582900  |
| C | 5.55235300  | 4.53723800  | 4.25886500  |
| C | 5.09173300  | 3.24451400  | 4.17787000  |
| C | 4.63369300  | 2.71639200  | 2.93809500  |
| C | 4.65451100  | 3.54635600  | 1.77101300  |
| C | 5.13279600  | 4.88290600  | 1.87390300  |
| C | 5.57338200  | 5.37625600  | 3.07901800  |
| C | -1.73389000 | -0.87702000 | -9.97676600 |
| C | -1.00642600 | -0.23228200 | -9.00467200 |
| C | -1.66330600 | 0.50062300  | -7.97652100 |
| C | -3.09426500 | 0.55951200  | -7.96101100 |
| C | -3.83125700 | -0.11585400 | -8.97413400 |
| C | -3.18047800 | -0.81739300 | -9.96113400 |
| N | -3.75143500 | 1.23944400  | -6.99932000 |
| N | -8.56312100 | 3.60691200  | 0.71887500  |
| N | -8.60514200 | 1.97183000  | 3.01864600  |
| N | -3.94260800 | -6.17794700 | 3.43170600  |
| N | -1.12305800 | -6.29348000 | 3.39938000  |
| N | 4.18209600  | 1.44685600  | 2.88001800  |
| N | 4.22334800  | 3.08215900  | 0.58037500  |

|   |             |             |             |
|---|-------------|-------------|-------------|
| N | -0.93186400 | 1.12338300  | -7.02983400 |
| C | -1.58755800 | 1.81464500  | -6.09972600 |
| C | -3.02122200 | 1.87364000  | -6.08421400 |
| C | -3.69712400 | 2.59225900  | -5.00109700 |
| C | -2.95003400 | 3.48847800  | -4.19637100 |
| C | -8.24979100 | 2.31430500  | 0.65668500  |
| C | -8.27125900 | 1.48289300  | 1.82602900  |
| C | -7.85356100 | 0.08282200  | 1.71750600  |
| C | -7.76670200 | -0.51382200 | 0.43474900  |
| C | -3.20134400 | -5.11812900 | 3.74824400  |
| C | -1.76768600 | -5.17694800 | 3.73206700  |
| C | -0.99745600 | -3.96532900 | 4.02385200  |
| C | -1.64704500 | -2.86652500 | 4.64000900  |
| C | 3.78327200  | 0.98800900  | 1.69540900  |
| C | 3.80434300  | 1.81948100  | 0.52609400  |
| C | 3.29258100  | 1.28870600  | -0.73990900 |
| C | 3.10863200  | -0.10991600 | -0.87763400 |
| C | -0.83173600 | 2.47438500  | -5.03205200 |
| C | 0.47127100  | 2.04955700  | -4.72146200 |
| C | -1.48520400 | 3.42815100  | -4.21212400 |
| C | 1.14200700  | 2.51540400  | -3.58574100 |
| C | 2.16014900  | 1.69395800  | -2.87124200 |
| C | -7.81063700 | 1.74457000  | -0.61961800 |
| C | -7.30741400 | 2.58020000  | -1.63117200 |
| C | -7.74468200 | 0.33570300  | -0.76002900 |
| C | -6.69530400 | 2.05776600  | -2.77534400 |
| C | -5.62921200 | 2.79379000  | -3.51259100 |
| C | 3.25024200  | -0.37313100 | 1.59718900  |
| C | 2.75609600  | -1.02334700 | 2.74080600  |
| C | 3.08702900  | -0.95945200 | 0.31712100  |
| C | 2.05956300  | -2.23316200 | 2.65167800  |
| C | 1.01034800  | -2.62053800 | 3.63705400  |
| C | -3.86287200 | -3.84749800 | 4.05535400  |
| C | -5.17504800 | -3.60838700 | 3.61284500  |
| C | -3.11187900 | -2.80609400 | 4.65573600  |
| C | -5.76119700 | -2.34200800 | 3.71021500  |
| C | -6.79644100 | -1.86926500 | 2.74761300  |
| C | -6.94919300 | -2.53848200 | 1.50926400  |
| C | 0.44066300  | -1.62758700 | 4.47025000  |
| C | 2.21212400  | 0.29815400  | -3.10293600 |
| C | -4.95862500 | 3.86555900  | -2.87520900 |
| C | -7.38955300 | -0.60658900 | 2.85072500  |
| C | -5.09362000 | -1.39939900 | 4.52904200  |
| C | -6.86620600 | 0.67108600  | -3.00458300 |
| C | -5.02359700 | 2.27551300  | -4.66211400 |
| C | 0.57545900  | 3.63784400  | -2.93474200 |

|   |              |              |              |
|---|--------------|--------------|--------------|
| C | 2.83767400   | 2.16357500   | -1.74113000  |
| C | 2.13008200   | -2.91143300  | 1.41086300   |
| C | 0.32003200   | -3.83426400  | 3.55287500   |
| C | -7.38733800  | -0.16119300  | -2.03141700  |
| C | -7.43209600  | -1.88392800  | 0.39138000   |
| C | -0.69359500  | 4.08787700   | -3.24820700  |
| C | -3.66399000  | 4.21022900   | -3.21641000  |
| C | 2.68439100   | -0.57480900  | -2.14053900  |
| C | 2.64051000   | -2.29752600  | 0.28220600   |
| C | -0.84338100  | -1.75373400  | 4.96688900   |
| C | -3.81384600  | -1.63087500  | 4.99796900   |
| O | -3.77863200  | -1.49289600  | -10.97176400 |
| O | -1.21534700  | -1.59856200  | -10.99947800 |
| O | -10.03349200 | 7.28665800   | 3.46561900   |
| O | -10.07154000 | 5.80027700   | 5.55633700   |
| O | -4.01934700  | -10.82598000 | 2.15224300   |
| O | -1.45609400  | -10.93062300 | 2.12147200   |
| O | 6.01207600   | 5.14021200   | 5.38159600   |
| O | 6.04933100   | 6.62684500   | 3.29101900   |
| C | -10.12316300 | 5.04296500   | 6.75725700   |
| C | -10.04346000 | 8.17255900   | 2.35500100   |
| C | -5.19811000  | -1.47768800  | -11.02868000 |
| C | 0.19900300   | -1.70025400  | -11.08705300 |
| C | -5.43984000  | -10.85088600 | 2.15310700   |
| C | -0.04275700  | -11.07098900 | 2.08751300   |
| C | 6.02856700   | 4.37985900   | 6.58158700   |
| C | 6.10732800   | 7.50996100   | 2.17965100   |
| H | -9.26749300  | 6.07214300   | 1.12743900   |
| H | -9.34147000  | 3.18003600   | 5.19545500   |
| H | -5.12676900  | -8.40614100  | 2.82061100   |
| H | -0.13943400  | -8.61008300  | 2.76200100   |
| H | 5.06267400   | 2.58870900   | 5.03909800   |
| H | 5.13517200   | 5.48125600   | 0.97135600   |
| H | 0.07605900   | -0.25463200  | -8.98583100  |
| H | -4.91124500  | -0.04904000  | -8.93186800  |
| H | 0.88404800   | 1.25353700   | -5.33082100  |
| H | -7.30287500  | 3.64511600   | -1.42800600  |
| H | 2.82964500   | -0.48508800  | 3.67899900   |
| H | -5.66606200  | -4.41547400  | 3.08099400   |
| H | -6.56522500  | -3.54561500  | 1.38739000   |
| H | 0.96005500   | -0.68803400  | 4.62543000   |
| H | 1.75865600   | -0.11953700  | -3.99540500  |
| H | -5.40828600  | 4.35066300   | -2.01551000  |
| H | -7.39842100  | -0.06493400  | 3.78981600   |
| H | -5.53036400  | -0.42024600  | 4.69367800   |
| H | -6.46788300  | 0.21848100   | -3.90629500  |

|   |              |              |              |
|---|--------------|--------------|--------------|
| H | -5.51317700  | 1.51638400   | -5.26159700  |
| H | 1.08189000   | 4.08332400   | -2.08523700  |
| H | 2.92456900   | 3.22512000   | -1.53885100  |
| H | 1.66239500   | -3.88362800  | 1.29815100   |
| H | 0.73132200   | -4.67817300  | 3.01064800   |
| H | -7.39956000  | -1.22871600  | -2.22308400  |
| H | -7.43073100  | -2.41546300  | -0.55411800  |
| H | -1.11736900  | 4.88540800   | -2.64750000  |
| H | -3.16350000  | 4.96995600   | -2.62579500  |
| H | 2.60501400   | -1.63959000  | -2.33140800  |
| H | 2.57496500   | -2.82626500  | -0.66258900  |
| H | -1.26587100  | -0.91737400  | 5.51324500   |
| H | -3.31209100  | -0.83210800  | 5.53341600   |
| H | -10.45242900 | 5.73724700   | 7.53182700   |
| H | -10.83928000 | 4.21529100   | 6.67633000   |
| H | -9.13557000  | 4.64181100   | 7.01863600   |
| H | -10.36589400 | 9.13779300   | 2.74840100   |
| H | -9.04321500  | 8.27074500   | 1.91403400   |
| H | -10.74710700 | 7.83619600   | 1.58289200   |
| H | -5.46620900  | -2.06997500  | -11.90487600 |
| H | -5.63819300  | -1.92965700  | -10.13055400 |
| H | -5.58166000  | -0.45589500  | -11.14373800 |
| H | 0.39843300   | -2.31152400  | -11.96851900 |
| H | 0.66286200   | -0.71339000  | -11.21091900 |
| H | 0.61962000   | -2.18807300  | -10.19840800 |
| H | -5.71883200  | -11.86839100 | 1.87516900   |
| H | -5.84211000  | -10.61744500 | 3.14713700   |
| H | -5.85171300  | -10.14384800 | 1.42164400   |
| H | 0.14564900   | -12.10741200 | 1.80337400   |
| H | 0.40715400   | -10.39871400 | 1.34575600   |
| H | 0.40145000   | -10.87249900 | 3.07122600   |
| H | 6.43067300   | 5.04406300   | 7.34810300   |
| H | 5.01762500   | 4.06037000   | 6.86531500   |
| H | 6.67273100   | 3.49658800   | 6.48518100   |
| H | 6.51646100   | 8.44514200   | 2.56494400   |
| H | 6.76375400   | 7.11772200   | 1.39246200   |
| H | 5.10899200   | 7.69024400   | 1.76083600   |

**1'** (1,2-alternate, R = Me)

|                                            |                             |
|--------------------------------------------|-----------------------------|
| Zero-point correction=                     | 1.238231 (Hartree/Particle) |
| Thermal correction to Energy=              | 1.317945                    |
| Thermal correction to Enthalpy=            | 1.318889                    |
| Thermal correction to Gibbs Free Energy=   | 1.120053                    |
| Sum of electronic and zero-point Energies= | -4425.685618                |



Sum of electronic and thermal Energies= -4425.605905  
 Sum of electronic and thermal Enthalpies= -4425.604961  
 Sum of electronic and thermal Free Energies= -4425.803797

|   |             |             |              |
|---|-------------|-------------|--------------|
| C | 16.62013700 | 12.96136200 | 4.45604600   |
| C | 16.33911100 | 13.05274400 | 3.11336900   |
| C | 15.12840900 | 12.51811600 | 2.58981600   |
| C | 14.20452000 | 11.87535100 | 3.47503200   |
| C | 14.51163800 | 11.79002800 | 4.86220200   |
| C | 15.68297600 | 12.31720200 | 5.35178600   |
| C | 15.71470200 | 4.38337200  | 5.03444400   |
| C | 14.59664600 | 5.09154000  | 4.66319300   |
| C | 13.71466200 | 4.58162500  | 3.66918100   |
| C | 14.00430500 | 3.32067300  | 3.05395900   |
| C | 15.16556800 | 2.60054300  | 3.45236400   |
| C | 16.00504200 | 3.10686800  | 4.41588300   |
| C | 7.98066200  | 3.88906700  | -8.91500500  |
| C | 8.44859700  | 3.24372100  | -7.79517400  |
| C | 9.83919500  | 3.23826600  | -7.49170200  |
| C | 10.75147900 | 3.91164300  | -8.36732600  |
| C | 10.24859500 | 4.57675000  | -9.52087800  |
| C | 8.90222600  | 4.57320600  | -9.79763200  |
| C | 13.44153700 | 10.69710500 | -11.99576400 |
| C | 14.13386600 | 9.73051000  | -11.30583700 |
| C | 14.54251100 | 9.95488100  | -9.96102200  |
| C | 14.22656600 | 11.20083000 | -9.33002500  |
| C | 13.50392900 | 12.18775500 | -10.05770500 |
| C | 13.11648700 | 11.95431100 | -11.35596300 |
| N | 14.60133700 | 11.45069900 | -8.05846800  |
| N | 14.86889100 | 12.62211400 | 1.27010700   |
| N | 13.05196300 | 11.34772600 | 3.01406500   |
| N | 12.62454300 | 5.29292400  | 3.31703800   |
| N | 13.19798300 | 2.81070800  | 2.10095400   |
| N | 10.27735700 | 2.60633400  | -6.38392100  |
| N | 12.07544000 | 3.92897300  | -8.11213000  |
| N | 15.21669500 | 8.99172500  | -9.29993000  |
| C | 15.60230400 | 9.25500800  | -8.05341300  |
| C | 15.29350200 | 10.50719900 | -7.42357600  |
| C | 15.69657700 | 10.72839800 | -6.03239900  |
| C | 16.66029600 | 9.86812600  | -5.44916200  |
| C | 13.71479900 | 12.12679300 | 0.82841600   |
| C | 12.79318000 | 11.47454000 | 1.71455700   |
| C | 11.57067400 | 10.88114700 | 1.16660600   |
| C | 11.14413300 | 11.25988500 | -0.13175800  |
| C | 11.82208300 | 4.76933100  | 2.39229600   |
| C | 12.11400300 | 3.51208300  | 1.77434200   |

|   |             |             |             |
|---|-------------|-------------|-------------|
| C | 11.23448800 | 3.01986900  | 0.71334400  |
| C | 9.94864300  | 3.59182300  | 0.54320200  |
| C | 11.58869900 | 2.61307500  | -6.15165400 |
| C | 12.50045100 | 3.28176500  | -7.02876400 |
| C | 13.92482900 | 3.30428300  | -6.69252200 |
| C | 14.43114600 | 2.40764800  | -5.71729600 |
| C | 16.30232400 | 8.22096400  | -7.28686800 |
| C | 16.18052100 | 6.86829600  | -7.64618000 |
| C | 16.96794000 | 8.58465700  | -6.08860400 |
| C | 16.67347500 | 5.84873700  | -6.82493000 |
| C | 16.06297100 | 4.49088700  | -6.78351300 |
| C | 13.40608400 | 12.19655000 | -0.60218800 |
| C | 14.43691100 | 12.36327000 | -1.54258800 |
| C | 12.08177200 | 11.93546000 | -1.03468100 |
| C | 14.20141300 | 12.23964000 | -2.91599500 |
| C | 15.25183300 | 11.77388600 | -3.86508700 |
| C | 12.10515100 | 1.97852400  | -4.93831800 |
| C | 11.25124000 | 1.78724100  | -3.84145000 |
| C | 13.49496100 | 1.72996300  | -4.81117000 |
| C | 11.73020200 | 1.35555800  | -2.60271500 |
| C | 11.00185900 | 1.75620200  | -1.36822500 |
| C | 10.64680500 | 5.52288400  | 1.95262100  |
| C | 10.60535700 | 6.91243300  | 2.13984800  |
| C | 9.64394400  | 4.87682200  | 1.18560300  |
| C | 9.58965500  | 7.70014800  | 1.59216900  |
| C | 9.87308600  | 9.12392600  | 1.25956800  |
| C | 9.30980400  | 9.67684600  | 0.08521700  |
| C | 9.63501000  | 2.12502600  | -1.38213500 |
| C | 16.62316800 | 3.43358900  | -6.02654500 |
| C | 16.38342500 | 11.08799800 | -3.36195500 |
| C | 10.92250200 | 9.83755700  | 1.84814200  |
| C | 8.46776800  | 7.01147300  | 1.07082600  |
| C | 12.84637700 | 12.23095100 | -3.32576500 |
| C | 15.02448100 | 11.67611400 | -5.24193100 |
| C | 17.54082000 | 6.24085800  | -5.77797200 |
| C | 14.74094200 | 4.32420500  | -7.20372900 |
| C | 13.05737000 | 0.86343900  | -2.57194600 |
| C | 11.73601200 | 2.11685400  | -0.23634400 |
| C | 11.81822100 | 12.09644500 | -2.41132500 |
| C | 9.92141900  | 10.72178400 | -0.58350900 |
| C | 17.69220900 | 7.57057400  | -5.42850800 |
| C | 17.07397900 | 10.17339400 | -4.13529900 |
| C | 15.82823600 | 2.42442000  | -5.50788300 |
| C | 13.91233100 | 1.04731900  | -3.64588900 |
| C | 9.12651000  | 3.01715000  | -0.45278100 |
| C | 8.49755700  | 5.64070900  | 0.87211400  |

|   |             |             |              |
|---|-------------|-------------|--------------|
| O | 12.42987300 | 12.81990400 | -12.14048100 |
| O | 13.00942600 | 10.59289400 | -13.27643900 |
| O | 17.73601000 | 13.43580500 | 5.06096500   |
| O | 16.07301700 | 12.29750300 | 6.64992800   |
| O | 16.62035300 | 4.77225300  | 5.96430900   |
| O | 17.13277100 | 2.50909800  | 4.87057000   |
| O | 6.68333400  | 3.95750600  | -9.29985500  |
| O | 8.31552000  | 5.17214400  | -10.86211500 |
| C | 15.19245200 | 11.70793600 | 7.59543500   |
| C | 18.70080300 | 14.09052800 | 4.24918400   |
| C | 12.08032000 | 14.08041400 | -11.58601300 |
| C | 13.31469000 | 9.39851100  | -13.98157100 |
| C | 16.40898900 | 6.01853900  | 6.61212700   |
| C | 17.48501600 | 1.25073900  | 4.31344700   |
| C | 5.71682500  | 3.30822700  | -8.48608400  |
| C | 9.15312300  | 5.86981600  | -11.77273800 |
| H | 17.01454800 | 13.53127100 | 2.41519900   |
| H | 13.78742400 | 11.30158700 | 5.50223900   |
| H | 14.34833900 | 6.04898100  | 5.10386800   |
| H | 15.35221100 | 1.65040300  | 2.96761700   |
| H | 7.78845100  | 2.72329800  | -7.11257400  |
| H | 10.96651200 | 5.07799600  | -10.15795500 |
| H | 14.39439200 | 8.77883100  | -11.75209400 |
| H | 13.28180600 | 13.11761800 | -9.54910200  |
| H | 15.58028900 | 6.64009900  | -8.52001000  |
| H | 15.44292100 | 12.46984400 | -1.15255900  |
| H | 10.23384200 | 2.14341800  | -3.94967700  |
| H | 11.47684600 | 7.36902500  | 2.59326700   |
| H | 8.45769300  | 9.19622500  | -0.38412300  |
| H | 8.98931500  | 1.77934800  | -2.18429400  |
| H | 17.67829800 | 3.44929000  | -5.76870300  |
| H | 16.64658400 | 11.17536000 | -2.31323600  |
| H | 11.34846300 | 9.52449500  | 2.79497700   |
| H | 7.59597000  | 7.56688200  | 0.73686500   |
| H | 12.60099700 | 12.19874200 | -4.38190800  |
| H | 14.23516900 | 12.24314400 | -5.72253900  |
| H | 17.99732200 | 5.48850500  | -5.14318700  |
| H | 14.25709900 | 5.07233900  | -7.81996600  |
| H | 13.44722800 | 0.41475900  | -1.66279000  |
| H | 12.77835300 | 1.83815300  | -0.13886400  |
| H | 10.80691000 | 11.99195900 | -2.78923800  |
| H | 9.50532000  | 11.03516200 | -1.53485400  |
| H | 18.28504100 | 7.80583100  | -4.55124100  |
| H | 17.86787300 | 9.60204000  | -3.66650000  |
| H | 16.28737900 | 1.69255900  | -4.85094200  |
| H | 14.94841900 | 0.74281000  | -3.53751000  |

|   |             |             |              |
|---|-------------|-------------|--------------|
| H | 8.09856800  | 3.34706600  | -0.56433000  |
| H | 7.65243900  | 5.17299000  | 0.37712500   |
| H | 15.68565800 | 11.80825700 | 8.56354600   |
| H | 14.22611200 | 12.22753700 | 7.61887800   |
| H | 15.02423100 | 10.64538300 | 7.37690800   |
| H | 19.50259800 | 14.39115600 | 4.92533200   |
| H | 19.10070000 | 13.41553700 | 3.48167800   |
| H | 18.27665200 | 14.97856000 | 3.76351100   |
| H | 11.54421200 | 14.61247700 | -12.37336600 |
| H | 11.42826500 | 13.96428500 | -10.71084200 |
| H | 12.97266900 | 14.65078400 | -11.29829500 |
| H | 12.89291300 | 9.52672800  | -14.97968000 |
| H | 14.39878000 | 9.24544100  | -14.05681800 |
| H | 12.86039900 | 8.52273200  | -13.50020100 |
| H | 17.24192300 | 6.13663500  | 7.30697600   |
| H | 16.40974200 | 6.84718800  | 5.89248600   |
| H | 15.46256000 | 6.02332900  | 7.16802900   |
| H | 18.40790900 | 0.95277400  | 4.81338300   |
| H | 16.70656400 | 0.49992900  | 4.49998000   |
| H | 17.66062400 | 1.32806600  | 3.23279900   |
| H | 4.75507200  | 3.48339100  | -8.97064500  |
| H | 5.90690300  | 2.22904000  | -8.42499900  |
| H | 5.70034100  | 3.72992800  | -7.47291000  |
| H | 8.48835700  | 6.27123200  | -12.53922100 |
| H | 9.68262300  | 6.69340200  | -11.27685900 |
| H | 9.88543300  | 5.19655300  | -12.23666100 |

**1'** (partial cone, R = Me)

|                                              |                             |
|----------------------------------------------|-----------------------------|
| Zero-point correction=                       | 1.238247 (Hartree/Particle) |
| Thermal correction to Energy=                | 1.317997                    |
| Thermal correction to Enthalpy=              | 1.318941                    |
| Thermal correction to Gibbs Free Energy=     | 1.120032                    |
| Sum of electronic and zero-point Energies=   | -4425.684810                |
| Sum of electronic and thermal Energies=      | -4425.605059                |
| Sum of electronic and thermal Enthalpies=    | -4425.604115                |
| Sum of electronic and thermal Free Energies= | -4425.803025                |

|   |             |             |             |
|---|-------------|-------------|-------------|
| C | -4.67004900 | 0.38410700  | -5.05537100 |
| C | -5.65941200 | -0.55807900 | -4.90200300 |
| C | -6.26617600 | -0.76951800 | -3.63201400 |
| C | -5.83175000 | 0.00542600  | -2.50899900 |
| C | -4.80667700 | 0.97684100  | -2.68622100 |
| C | -4.23546800 | 1.17184500  | -3.92125900 |
| C | 0.47466600  | -2.75925800 | 1.03949700  |

|   |              |              |             |
|---|--------------|--------------|-------------|
| C | -0.74909000  | -2.30269400  | 1.46757600  |
| C | -1.46724300  | -3.00003500  | 2.47939900  |
| C | -0.90183100  | -4.18573100  | 3.05121500  |
| C | 0.36669300   | -4.64327300  | 2.59591200  |
| C | 1.04588600   | -3.95779900  | 1.61709500  |
| C | 1.94313800   | -11.76385400 | 2.33076500  |
| C | 1.03246300   | -11.24813500 | 3.22200800  |
| C | -0.36338400  | -11.44348100 | 3.02387000  |
| C | -0.81368000  | -12.18540700 | 1.88492700  |
| C | 0.14324300   | -12.70700000 | 0.96949800  |
| C | 1.48791200   | -12.50849700 | 1.17583200  |
| C | -14.56252900 | -12.74560000 | -1.13808100 |
| C | -13.19770700 | -12.88579400 | -1.05175500 |
| C | -12.33381800 | -11.86060900 | -1.52969400 |
| C | -12.89976300 | -10.67582500 | -2.10183300 |
| C | -14.31498100 | -10.54688700 | -2.18122500 |
| C | -15.13467200 | -11.54788100 | -1.71649100 |
| N | -12.11265600 | -9.68103400  | -2.55996800 |
| N | -7.23812100  | -1.69604800  | -3.50297500 |
| N | -6.37554300  | -0.17424200  | -1.28782400 |
| N | -2.67025200  | -2.54099400  | 2.87951300  |
| N | -1.55603600  | -4.87681000  | 4.00642500  |
| N | -1.24073900  | -10.92490400 | 3.90737100  |
| N | -2.12845700  | -12.39435700 | 1.66694000  |
| N | -10.99755300 | -12.01549400 | -1.43263300 |
| C | -10.22750100 | -11.04050700 | -1.91149500 |
| C | -10.79450200 | -9.85347900  | -2.48475300 |
| C | -9.90507300  | -8.78052800  | -2.93658300 |
| C | -8.52679500  | -9.05730300  | -3.11813800 |
| C | -7.79135900  | -1.84506300  | -2.30127500 |
| C | -7.34929700  | -1.07455600  | -1.17398600 |
| C | -7.93843100  | -1.32960500  | 0.14310200  |
| C | -9.15541200  | -2.05307700  | 0.22444300  |
| C | -3.29935100  | -3.22050900  | 3.83645900  |
| C | -2.73453300  | -4.40426200  | 4.40777600  |
| C | -3.50088300  | -5.14665500  | 5.40977400  |
| C | -4.61186400  | -4.53376500  | 6.04318700  |
| C | -2.53479600  | -11.15486400 | 3.69706500  |
| C | -2.98613000  | -11.90603300 | 2.56043100  |
| C | -4.42421900  | -12.08813800 | 2.34703800  |
| C | -5.31774200  | -11.82774900 | 3.41615000  |
| C | -8.77177800  | -11.15311600 | -1.79055800 |
| C | -8.20603900  | -12.01148700 | -0.83244100 |
| C | -7.94740900  | -10.27014300 | -2.53215400 |
| C | -6.83560800  | -11.99417200 | -0.55283700 |
| C | -6.29309300  | -12.34904800 | 0.78913400  |

|   |              |              |             |
|---|--------------|--------------|-------------|
| C | -8.83215900  | -2.85889000  | -2.11250000 |
| C | -8.94697300  | -3.93291300  | -3.01146900 |
| C | -9.61439000  | -2.83148800  | -0.93075700 |
| C | -9.79638600  | -5.01430100  | -2.75466800 |
| C | -9.51390800  | -6.38692000  | -3.26185800 |
| C | -3.52285000  | -10.57496900 | 4.61046800  |
| C | -3.19208500  | -9.45725800  | 5.39453300  |
| C | -4.85837300  | -11.05028200 | 4.57182200  |
| C | -4.16502600  | -8.76414500  | 6.12245900  |
| C | -4.05575100  | -7.30779400  | 6.41448400  |
| C | -4.62808600  | -2.78529000  | 4.26949000  |
| C | -5.40419000  | -1.98624900  | 3.41723400  |
| C | -5.19199500  | -3.31874100  | 5.45630500  |
| C | -6.73943900  | -1.68755400  | 3.69939700  |
| C | -7.67418600  | -1.41589100  | 2.57215900  |
| C | -8.99852400  | -1.90821300  | 2.64790500  |
| C | -4.98510400  | -6.62843700  | 7.23867200  |
| C | -7.15875100  | -12.33832800 | 1.90928700  |
| C | -8.20191000  | -6.71249000  | -3.68252300 |
| C | -7.22810400  | -1.00629100  | 1.31115100  |
| C | -7.19514400  | -2.00049800  | 5.00282400  |
| C | -10.73868300 | -4.84302300  | -1.71208200 |
| C | -10.37948000 | -7.46107100  | -3.03048900 |
| C | -6.01313500  | -11.29448800 | -1.46839900 |
| C | -4.92101900  | -12.36215900 | 1.06133700  |
| C | -5.42154300  | -9.39841300  | 6.26680200  |
| C | -3.24360200  | -6.51177600  | 5.60302400  |
| C | -10.65731800 | -3.77687400  | -0.83567500 |
| C | -9.72162200  | -2.20638000  | 1.50696300  |
| C | -6.55370800  | -10.46883200 | -2.43667000 |
| C | -7.72832900  | -8.01012800  | -3.62494300 |
| C | -6.68299300  | -12.09819400 | 3.18495300  |
| C | -5.75322900  | -10.51577500 | 5.52182000  |
| C | -5.25442500  | -5.28167000  | 7.05521600  |
| C | -6.44241100  | -2.79412000  | 5.85340500  |
| O | -16.48908100 | -11.53246700 | -1.74354600 |
| O | -15.47532600 | -13.65459300 | -0.71863900 |
| O | -4.02735900  | 0.66956200   | -6.21364400 |
| O | -3.25938400  | 2.06896200   | -4.20427700 |
| O | 1.24161400   | -2.17891000  | 0.08499500  |
| O | 2.25340000   | -4.30250500  | 1.10799000  |
| O | 3.29019300   | -11.64344700 | 2.42347700  |
| O | 2.48261000   | -12.95992800 | 0.37400700  |
| C | -2.79896100  | 2.89953000   | -3.14825000 |
| C | -4.40413100  | -0.05640900  | -7.37534500 |
| C | -17.12682900 | -10.39228600 | -2.30184500 |

|   |              |              |             |
|---|--------------|--------------|-------------|
| C | -14.99218100 | -14.86061100 | -0.14372400 |
| C | 0.74520800   | -1.00219800  | -0.53670300 |
| C | 2.87530100   | -5.47373100  | 1.61695200  |
| C | 3.81585400   | -10.95027500 | 3.54608200  |
| C | 2.11628300   | -13.70749700 | -0.77728500 |
| H | -6.01207900  | -1.16216600  | -5.72865300 |
| H | -4.50705200  | 1.54745200   | -1.81596500 |
| H | -1.20795200  | -1.41217300  | 1.05653600  |
| H | 0.76181200   | -5.54414700  | 3.04849800  |
| H | 1.33631600   | -10.68646200 | 4.09659600  |
| H | -0.23279800  | -13.26234600 | 0.11929600  |
| H | -12.73537300 | -13.76781900 | -0.62640800 |
| H | -14.70795200 | -9.63844800  | -2.62049500 |
| H | -8.89390300  | -12.59806900 | -0.23388700 |
| H | -8.25963700  | -3.94551300  | -3.84990900 |
| H | -2.17984400  | -9.07690300  | 5.31303800  |
| H | -4.97394500  | -1.74195800  | 2.45357500  |
| H | -9.41717300  | -2.18840800  | 3.60903800  |
| H | -5.56534600  | -7.18014900  | 7.97290500  |
| H | -8.23242900  | -12.38950000 | 1.76338200  |
| H | -7.50312000  | -5.92200800  | -3.93466200 |
| H | -6.25757200  | -0.53864600  | 1.18736300  |
| H | -8.18676000  | -1.69111300  | 5.32083700  |
| H | -11.46475700 | -5.62218200  | -1.50605400 |
| H | -11.42491000 | -7.29877400  | -2.79335100 |
| H | -4.93625500  | -11.29539100 | -1.33774500 |
| H | -4.19156800  | -12.46276900 | 0.26549300  |
| H | -6.19625300  | -8.93328000  | 6.86766100  |
| H | -2.48388000  | -6.95781300  | 4.97271100  |
| H | -11.34185800 | -3.75144700  | 0.00533200  |
| H | -10.68972600 | -2.68149600  | 1.62299200  |
| H | -5.87560000  | -9.87774700  | -3.04266600 |
| H | -6.68431100  | -8.18538300  | -3.86107100 |
| H | -7.40298100  | -11.99856500 | 3.99008100  |
| H | -6.76621800  | -10.89696400 | 5.59240000  |
| H | -6.04594900  | -4.82948800  | 7.64437200  |
| H | -6.87753300  | -3.08875400  | 6.80310600  |
| H | -2.03647300  | 3.54419800   | -3.58821100 |
| H | -3.61137600  | 3.51494000   | -2.74132300 |
| H | -2.35602000  | 2.30676400   | -2.33738500 |
| H | -3.77558500  | 0.32602700   | -8.18101200 |
| H | -4.22604800  | -1.13199600  | -7.24890900 |
| H | -5.46051500  | 0.10798900   | -7.62314900 |
| H | -18.19806800 | -10.58541200 | -2.22736800 |
| H | -16.87753700 | -9.48170400  | -1.74213900 |
| H | -16.84976300 | -10.25609800 | -3.35498000 |

|   |              |              |             |
|---|--------------|--------------|-------------|
| H | -15.87860500 | -15.44064700 | 0.11744300  |
| H | -14.37993000 | -15.42563300 | -0.85808000 |
| H | -14.40231800 | -14.66316300 | 0.76052000  |
| H | 1.50432600   | -0.70770400  | -1.26304000 |
| H | -0.20373700  | -1.19420700  | -1.05356900 |
| H | 0.60223800   | -0.19544500  | 0.19371700  |
| H | 3.81862400   | -5.56732200  | 1.07664200  |
| H | 3.07473500   | -5.38386700  | 2.69257100  |
| H | 2.25821000   | -6.36325800  | 1.43680100  |
| H | 4.90064400   | -10.98061900 | 3.43267900  |
| H | 3.47736300   | -9.90620100  | 3.56586400  |
| H | 3.53011100   | -11.43872300 | 4.48634800  |
| H | 3.05318800   | -13.97055500 | -1.27067800 |
| H | 1.57524900   | -14.62216200 | -0.50333700 |
| H | 1.49616100   | -13.11167900 | -1.45922100 |

**1'** (cone, R = Me)

|                                              |                             |
|----------------------------------------------|-----------------------------|
| Zero-point correction=                       | 1.238120 (Hartree/Particle) |
| Thermal correction to Energy=                | 1.317826                    |
| Thermal correction to Enthalpy=              | 1.318770                    |
| Thermal correction to Gibbs Free Energy=     | 1.120053                    |
| Sum of electronic and zero-point Energies=   | -4425.684505                |
| Sum of electronic and thermal Energies=      | -4425.604799                |
| Sum of electronic and thermal Enthalpies=    | -4425.603855                |
| Sum of electronic and thermal Free Energies= | -4425.802572                |

|   |              |             |             |
|---|--------------|-------------|-------------|
| C | -19.58784700 | -6.47131800 | -5.34532600 |
| C | -18.68188900 | -7.49729700 | -5.21721200 |
| C | -18.90345000 | -8.54472000 | -4.27933900 |
| C | -20.08029400 | -8.51977100 | -3.46449100 |
| C | -21.00575300 | -7.44798300 | -3.60830000 |
| C | -20.77764700 | -6.44607300 | -4.52156200 |
| C | -19.52244400 | -4.26157200 | 3.06113100  |
| C | -19.98330600 | -5.52207200 | 2.76457400  |
| C | -19.66279000 | -6.62517500 | 3.60489000  |
| C | -18.85288500 | -6.41049500 | 4.76697600  |
| C | -18.38493200 | -5.09831200 | 5.05836800  |
| C | -18.70416800 | -4.04458000 | 4.23561300  |
| C | -11.83406400 | -4.07511100 | 8.31862100  |
| C | -12.58379700 | -5.21573500 | 8.48212500  |
| C | -12.19990200 | -6.43053200 | 7.84752200  |
| C | -11.02378700 | -6.45481700 | 7.03159100  |
| C | -10.26158600 | -5.26358400 | 6.87076900  |
| C | -10.64517700 | -4.09958300 | 7.49352800  |
| C | -12.05190700 | -4.18510600 | -0.37615000 |



|   |              |              |             |
|---|--------------|--------------|-------------|
| C | -11.42410000 | -5.24514300  | 0.23325500  |
| C | -11.57004000 | -6.56432800  | -0.28073400 |
| C | -12.37958200 | -6.77943700  | -1.44300300 |
| C | -13.02200600 | -5.66975300  | -2.06074000 |
| C | -12.87003300 | -4.40251200  | -1.55065800 |
| N | -12.54628800 | -8.01566900  | -1.95493400 |
| N | -18.00340700 | -9.54376600  | -4.17112400 |
| N | -20.32383600 | -9.49455000  | -2.56423400 |
| N | -20.11925100 | -7.85507900  | 3.29323800  |
| N | -18.52329200 | -7.43210300  | 5.58297100  |
| N | -12.94803500 | -7.53937500  | 8.02271500  |
| N | -10.62878000 | -7.58733700  | 6.41408800  |
| N | -10.95113800 | -7.59182300  | 0.33519900  |
| C | -11.10640600 | -8.80551800  | -0.19008800 |
| C | -11.91485200 | -9.02031900  | -1.35076300 |
| C | -12.10111700 | -10.38513900 | -1.84570500 |
| C | -11.23647300 | -11.41832500 | -1.40299800 |
| C | -18.26469400 | -10.51544100 | -3.29998900 |
| C | -19.44458800 | -10.49036700 | -2.48279600 |
| C | -19.65663900 | -11.55452300 | -1.49799700 |
| C | -18.90575100 | -12.75254300 | -1.60795900 |
| C | -19.80439300 | -8.85326900  | 4.11637100  |
| C | -18.99550600 | -8.63890000  | 5.27682400  |
| C | -18.62828700 | -9.78492200  | 6.11001100  |
| C | -19.33047700 | -11.00920600 | 5.97164800  |
| C | -12.53655800 | -8.65874200  | 7.43195100  |
| C | -11.35713300 | -8.68317400  | 6.61403000  |
| C | -10.97873800 | -9.92776000  | 5.93947400  |
| C | -11.55511800 | -11.14821900 | 6.37470500  |
| C | -10.48805700 | -9.95659800  | 0.46951400  |
| C | -10.14563300 | -9.87334100  | 1.82717500  |
| C | -10.40614900 | -11.19770700 | -0.21171000 |
| C | -9.71495500  | -10.98954800 | 2.54851900  |
| C | -9.96210700  | -11.04352900 | 4.01613100  |
| C | -17.29914700 | -11.60462500 | -3.13106500 |
| C | -15.95668300 | -11.42737200 | -3.50505800 |
| C | -17.70006300 | -12.77821200 | -2.44329600 |
| C | -14.97950700 | -12.37549800 | -3.18365200 |
| C | -13.55354800 | -12.00903900 | -2.95949400 |
| C | -13.33581500 | -9.87873000  | 7.57319500  |
| C | -14.69670100 | -9.80033600  | 7.91289300  |
| C | -12.76081400 | -11.12313900 | 7.21002600  |
| C | -15.52442900 | -10.92733400 | 7.87000300  |
| C | -16.98328600 | -10.83708800 | 7.58447500  |
| C | -20.24189000 | -10.21258300 | 3.79497700  |
| C | -20.56693000 | -10.53870400 | 2.47006000  |

|   |              |              |             |
|---|--------------|--------------|-------------|
| C | -20.16078200 | -11.22932300 | 4.78025400  |
| C | -20.82207400 | -11.85456800 | 2.07614900  |
| C | -20.54207000 | -12.25725600 | 0.66995000  |
| C | -19.99138800 | -13.53688900 | 0.42280500  |
| C | -17.83841700 | -11.96357100 | 7.65025300  |
| C | -10.33130300 | -12.27759600 | 4.60143700  |
| C | -12.54744200 | -12.98121200 | -2.74226800 |
| C | -20.47279600 | -11.33141700 | -0.37656200 |
| C | -20.99992100 | -12.80170000 | 3.11341700  |
| C | -15.44090400 | -13.63373200 | -2.73002100 |
| C | -13.23656900 | -10.69433800 | -2.60892800 |
| C | -9.38537200  | -12.14127200 | 1.79387500  |
| C | -10.18113800 | -9.89449400  | 4.78350500  |
| C | -14.88212700 | -12.18259900 | 7.75355700  |
| C | -17.47520000 | -9.71931000  | 6.90594400  |
| C | -16.76478800 | -13.83171400 | -2.38134600 |
| C | -19.20603800 | -13.77970200 | -0.68971000 |
| C | -9.72378500  | -12.24056800 | 0.45397500  |
| C | -11.42402200 | -12.69230000 | -1.98450200 |
| C | -11.09553400 | -12.32765200 | 5.75331900  |
| C | -13.53720000 | -12.27675200 | 7.44417500  |
| C | -18.97673200 | -12.04545600 | 6.86459900  |
| C | -20.67632400 | -12.49610000 | 4.42553600  |
| O | -13.43400200 | -3.27810200  | -2.05464300 |
| O | -11.98436200 | -2.89286400  | 0.02625100  |
| O | -19.48077800 | -5.42944600  | -6.20631000 |
| O | -21.59090400 | -5.38459700  | -4.74538200 |
| O | -19.76350100 | -3.14382000  | 2.33389500  |
| O | -18.31396200 | -2.75930300  | 4.41498300  |
| O | -12.10242800 | -2.86962900  | 8.87809200  |
| O | -9.99404500  | -2.91297800  | 7.41462900  |
| C | -22.79522400 | -5.30574700  | -3.99667400 |
| C | -18.35450100 | -5.40033800  | -7.07108800 |
| C | -14.25975900 | -3.41067000  | -3.20252600 |
| C | -11.20759500 | -2.59948700  | 1.17849300  |
| C | -20.55201900 | -3.27663200  | 1.16014800  |
| C | -17.50024900 | -2.46700300  | 5.54172200  |
| C | -13.23690600 | -2.77341900  | 9.72714000  |
| C | -8.80010400  | -2.86453300  | 6.64695000  |
| H | -17.78289100 | -7.55079300  | -5.81857800 |
| H | -21.88613100 | -7.46363000  | -2.97788600 |
| H | -20.59522100 | -5.72197700  | 1.89388200  |
| H | -17.77359200 | -4.97386700  | 5.94340100  |
| H | -13.47686200 | -5.23556500  | 9.09431300  |
| H | -9.37662500  | -5.32000900  | 6.24916700  |
| H | -10.80697300 | -5.12048700  | 1.11424000  |

|   |              |              |             |
|---|--------------|--------------|-------------|
| H | -13.62793300 | -5.87008800  | -2.93552000 |
| H | -10.37979500 | -8.94420100  | 2.33257000  |
| H | -15.68540300 | -10.47219600 | -3.94101900 |
| H | -15.10797500 | -8.81230700  | 8.08804200  |
| H | -20.45678400 | -9.75184900  | 1.73366700  |
| H | -20.06609600 | -14.31266700 | 1.17784500  |
| H | -17.56252500 | -12.82053200 | 8.25824800  |
| H | -10.13343300 | -13.20600700 | 4.07568000  |
| H | -12.68852000 | -13.99809000 | -3.09752500 |
| H | -20.94871100 | -10.36040100 | -0.29497500 |
| H | -21.31255700 | -13.81478200 | 2.87660100  |
| H | -14.73034600 | -14.42639100 | -2.51947700 |
| H | -13.94187700 | -9.89021700  | -2.78056600 |
| H | -8.93742700  | -13.00163700 | 2.28304100  |
| H | -9.84544500  | -8.92201800  | 4.44053200  |
| H | -15.47006700 | -13.09448600 | 7.77154100  |
| H | -16.89317700 | -8.80759800  | 6.84609700  |
| H | -17.04193700 | -14.78257700 | -1.93915900 |
| H | -18.72190600 | -14.74660300 | -0.77453900 |
| H | -9.54038600  | -13.18114500 | -0.05569400 |
| H | -10.73113800 | -13.49763300 | -1.76216900 |
| H | -11.43985000 | -13.29651800 | 6.09860300  |
| H | -13.12073100 | -13.26146700 | 7.26153300  |
| H | -19.54517500 | -12.97002800 | 6.87550700  |
| H | -20.73459600 | -13.28558200 | 5.16810900  |
| H | -23.29692200 | -4.39805200  | -4.33572200 |
| H | -23.43925600 | -6.17429600  | -4.18419100 |
| H | -22.59294400 | -5.23376000  | -2.92012300 |
| H | -18.46929700 | -4.50101800  | -7.67822200 |
| H | -17.41621200 | -5.34383500  | -6.50410200 |
| H | -18.32845900 | -6.28329400  | -7.72226100 |
| H | -14.60854100 | -2.40323200  | -3.43496100 |
| H | -13.69608700 | -3.81069300  | -4.05523000 |
| H | -15.12066700 | -4.06103200  | -3.00144200 |
| H | -11.29117000 | -1.52158800  | 1.32599800  |
| H | -11.59271700 | -3.12301400  | 2.06289700  |
| H | -10.15431500 | -2.86971800  | 1.02877000  |
| H | -20.61793000 | -2.27507200  | 0.73220100  |
| H | -20.08064300 | -3.95528700  | 0.43778800  |
| H | -21.55952700 | -3.64297100  | 1.39588500  |
| H | -17.30176800 | -1.39510900  | 5.49419000  |
| H | -18.01830800 | -2.70393600  | 6.47997900  |
| H | -16.55239000 | -3.01893200  | 5.50301300  |
| H | -13.26111200 | -1.73936100  | 10.07456400 |
| H | -14.16342200 | -3.00053600  | 9.18397000  |
| H | -13.14974900 | -3.44893900  | 10.58759600 |

|   |             |             |            |
|---|-------------|-------------|------------|
| H | -8.43778100 | -1.83832400 | 6.72558600 |
| H | -8.04309000 | -3.55354900 | 7.04255100 |
| H | -8.99177800 | -3.10705800 | 5.59362500 |

**1'** – transition state (Figure S13)

|                                              |              |              |                             |
|----------------------------------------------|--------------|--------------|-----------------------------|
| Zero-point correction=                       |              |              | 1.237291 (Hartree/Particle) |
| Thermal correction to Energy=                |              |              | 1.316311                    |
| Thermal correction to Enthalpy=              |              |              | 1.317255                    |
| Thermal correction to Gibbs Free Energy=     |              |              | 1.120297                    |
| Sum of electronic and zero-point Energies=   |              |              | -4425.636131                |
| Sum of electronic and thermal Energies=      |              |              | -4425.557112                |
| Sum of electronic and thermal Enthalpies=    |              |              | -4425.556168                |
| Sum of electronic and thermal Free Energies= |              |              | -4425.753125                |
| C                                            | -3.48398600  | -0.34589100  | -3.75631200                 |
| C                                            | -4.58704300  | -1.13973300  | -3.96469200                 |
| C                                            | -5.65067200  | -1.16264600  | -3.01973000                 |
| C                                            | -5.56149300  | -0.35064000  | -1.84314400                 |
| C                                            | -4.41167000  | 0.46295900   | -1.64283100                 |
| C                                            | -3.39394200  | 0.47451100   | -2.56725000                 |
| C                                            | -6.31854700  | -1.14518400  | 10.51988700                 |
| C                                            | -6.73603100  | -1.15695900  | 9.21019100                  |
| C                                            | -6.57846800  | -2.32484300  | 8.41180600                  |
| C                                            | -5.97367800  | -3.48946600  | 8.98346100                  |
| C                                            | -5.55053900  | -3.46082000  | 10.34223300                 |
| C                                            | -5.71321100  | -2.32557600  | 11.10017500                 |
| C                                            | 2.05317800   | -10.85266900 | 1.93533300                  |
| C                                            | 1.11804100   | -10.64727400 | 2.92216000                  |
| C                                            | -0.22479700  | -11.08405100 | 2.74834500                  |
| C                                            | -0.59755600  | -11.74037300 | 1.53110100                  |
| C                                            | 0.38269800   | -11.94235300 | 0.51963500                  |
| C                                            | 1.67666300   | -11.51614200 | 0.70530900                  |
| C                                            | -14.42337100 | -11.94229800 | 0.36049900                  |
| C                                            | -13.08217300 | -12.20800400 | 0.21984100                  |
| C                                            | -12.24139200 | -11.31904100 | -0.50770700                 |
| C                                            | -12.80623100 | -10.14014700 | -1.09413100                 |
| C                                            | -14.19709400 | -9.88048700  | -0.93693100                 |
| C                                            | -14.99431800 | -10.75012200 | -0.23173200                 |
| N                                            | -12.04023500 | -9.27574300  | -1.78802200                 |
| N                                            | -6.72282400  | -1.95264400  | -3.24205300                 |
| N                                            | -6.54492800  | -0.35306800  | -0.91777700                 |
| N                                            | -7.00896400  | -2.32235500  | 7.13455800                  |
| N                                            | -5.79066000  | -4.60645000  | 8.25162100                  |
| N                                            | -1.12845000  | -10.86461900 | 3.72762600                  |
| N                                            | -1.86359600  | -12.16291400 | 1.32625200                  |

|   |              |              |             |
|---|--------------|--------------|-------------|
| N | -10.92841600 | -11.59456400 | -0.63276500 |
| C | -10.18190200 | -10.74305100 | -1.33534100 |
| C | -10.74646000 | -9.56608700  | -1.92246600 |
| C | -9.88031000  | -8.63858700  | -2.65241000 |
| C | -8.55905400  | -9.02614100  | -2.99167400 |
| C | -7.70175500  | -1.92086600  | -2.34157100 |
| C | -7.60998000  | -1.11066400  | -1.16301900 |
| C | -8.67273400  | -1.21349900  | -0.16035600 |
| C | -9.94471700  | -1.70839600  | -0.54557700 |
| C | -6.84360300  | -3.43065300  | 6.41484300  |
| C | -6.19995600  | -4.59992700  | 6.98442600  |
| C | -5.92612900  | -5.77969800  | 6.15427300  |
| C | -6.34460700  | -5.72372000  | 4.80836800  |
| C | -2.36372200  | -11.31528600 | 3.52876300  |
| C | -2.73736000  | -11.97439600 | 2.31161100  |
| C | -4.13373100  | -12.37757700 | 2.12833100  |
| C | -4.96909000  | -12.50707600 | 3.26639800  |
| C | -8.74593700  | -10.99544600 | -1.46875300 |
| C | -8.12019800  | -11.90393800 | -0.60103200 |
| C | -7.97847800  | -10.23025200 | -2.38340500 |
| C | -6.73506800  | -12.09164400 | -0.58618900 |
| C | -6.05439700  | -12.62842800 | 0.62903300  |
| C | -8.87138600  | -2.78523400  | -2.51477100 |
| C | -8.76037800  | -3.97888200  | -3.24722600 |
| C | -10.04950500 | -2.51133500  | -1.77526100 |
| C | -9.79543300  | -4.91824900  | -3.28231800 |
| C | -9.49939300  | -6.36416800  | -3.48974100 |
| C | -3.40411300  | -11.04112900 | 4.52292900  |
| C | -3.35309600  | -9.84737200  | 5.26637500  |
| C | -4.59741100  | -11.80717200 | 4.50626700  |
| C | -4.47470500  | -9.39357200  | 5.96389800  |
| C | -4.91234600  | -7.96627000  | 5.75405300  |
| C | -7.38788600  | -3.46789300  | 5.05180400  |
| C | -8.07506600  | -2.37715900  | 4.45031900  |
| C | -7.22526300  | -4.66966800  | 4.33229500  |
| C | -8.67199300  | -2.52836000  | 3.20096800  |
| C | -9.23638000  | -1.56353100  | 2.18382300  |
| C | -10.59044800 | -1.69715600  | 1.80035900  |
| C | -5.17417700  | -7.77985900  | 4.37225700  |
| C | -6.79732900  | -13.06357100 | 1.75553200  |
| C | -8.26458000  | -6.82247100  | -4.01023900 |
| C | -8.33921600  | -1.13138100  | 1.20487200  |
| C | -8.66043600  | -3.81454200  | 2.60255000  |
| C | -11.05513300 | -4.47907100  | -2.80385400 |
| C | -10.32095500 | -7.32961600  | -2.90158600 |
| C | -6.01334500  | -11.47994300 | -1.64125700 |

|   |              |              |             |
|---|--------------|--------------|-------------|
| C | -4.68380000  | -12.43978400 | 0.83725300  |
| C | -5.49184700  | -10.33991000 | 6.22930000  |
| C | -5.25276800  | -6.93673500  | 6.63147300  |
| C | -11.17684700 | -3.31100000  | -2.07058500 |
| C | -10.94101300 | -1.74744300  | 0.45816400  |
| C | -6.61568300  | -10.58113800 | -2.50632300 |
| C | -7.81133300  | -8.10861800  | -3.76412000 |
| C | -6.27033200  | -13.00496200 | 3.03397600  |
| C | -5.54198100  | -11.53356100 | 5.52313500  |
| C | -5.88906100  | -6.70369900  | 3.91371200  |
| C | -7.93881900  | -4.84976500  | 3.13696500  |
| O | -16.32430800 | -10.60429600 | -0.02088700 |
| O | -15.31340600 | -12.71534100 | 1.02734300  |
| O | -2.41849400  | -0.24518800  | -4.58733700 |
| O | -2.25868600  | 1.20846000   | -2.47879900 |
| O | -6.41926600  | -0.09395400  | 11.36888300 |
| O | -5.34763600  | -2.18595300  | 12.39743700 |
| O | 3.35469200   | -10.48119300 | 1.99480000  |
| O | 2.68758500   | -11.65814300 | -0.18568000 |
| C | -2.09569200  | 2.03978900   | -1.33813100 |
| C | -2.43313000  | -1.01904500  | -5.77842500 |
| C | -16.96030600 | -9.45963900  | -0.57204700 |
| C | -14.83144300 | -13.90561200 | 1.63533900  |
| C | -7.00336700  | 1.10252300   | 10.87351300 |
| C | -4.74460900  | -3.30126800  | 13.03818500 |
| C | 3.80214700   | -9.82515200  | 3.17298400  |
| C | 2.39821100   | -12.30424700 | -1.41721600 |
| H | -4.68815600  | -1.76557800  | -4.84258500 |
| H | -4.37809500  | 1.06244700   | -0.74169500 |
| H | -7.19608600  | -0.29431100  | 8.74457000  |
| H | -5.09838400  | -4.36009300  | 10.74159800 |
| H | 1.36344400   | -10.15431500 | 3.85454300  |
| H | 0.06604000   | -12.44260100 | -0.38707200 |
| H | -12.62208200 | -13.08959500 | 0.64841900  |
| H | -14.59023600 | -8.98080700  | -1.39363300 |
| H | -8.75869300  | -12.37000000 | 0.13844100  |
| H | -7.78171600  | -4.20921700  | -3.65177500 |
| H | -2.51915600  | -9.17791900  | 5.07993800  |
| H | -8.10754800  | -1.43301900  | 4.98398900  |
| H | -11.33659300 | -1.94855900  | 2.55017200  |
| H | -4.86322000  | -8.54535400  | 3.67062800  |
| H | -7.83681000  | -13.35340500 | 1.64507400  |
| H | -7.61941900  | -6.14113500  | -4.55671600 |
| H | -7.29408900  | -0.97775900  | 1.45430900  |
| H | -9.18398000  | -3.96126700  | 1.66390700  |
| H | -11.93105100 | -5.10882800  | -2.92530400 |

|   |              |              |             |
|---|--------------|--------------|-------------|
| H | -11.29292200 | -7.06653900  | -2.50349200 |
| H | -4.94587900  | -11.64745200 | -1.74066200 |
| H | -4.01853500  | -12.18896300 | 0.01963600  |
| H | -6.34471800  | -10.05098300 | 6.83855600  |
| H | -5.01808100  | -6.99429000  | 7.68937000  |
| H | -12.14022500 | -3.07724000  | -1.62829900 |
| H | -11.96413000 | -2.00359900  | 0.20146500  |
| H | -5.99270600  | -10.08392900 | -3.24285100 |
| H | -6.82345100  | -8.38124800  | -4.12134000 |
| H | -6.92179900  | -13.23711100 | 3.87051300  |
| H | -6.42219800  | -12.15911500 | 5.63233300  |
| H | -6.09318100  | -6.61674600  | 2.85306700  |
| H | -7.93085600  | -5.80796000  | 2.63094900  |
| H | -1.13084100  | 2.53286300   | -1.46604900 |
| H | -2.88979400  | 2.79493900   | -1.27836000 |
| H | -2.08764100  | 1.44997000   | -0.41268200 |
| H | -1.49810200  | -0.79055700  | -6.29221300 |
| H | -2.47751500  | -2.09291100  | -5.55595500 |
| H | -3.28123600  | -0.74785800  | -6.42006700 |
| H | -18.01089000 | -9.53875900  | -0.28857800 |
| H | -16.53764200 | -8.53310700  | -0.16287900 |
| H | -16.87447200 | -9.44389100  | -1.66603800 |
| H | -15.69841100 | -14.36882900 | 2.10875800  |
| H | -14.40904800 | -14.59124200 | 0.88975700  |
| H | -14.07116400 | -13.68520200 | 2.39553300  |
| H | -6.98523000  | 1.80810900   | 11.70555300 |
| H | -6.42672700  | 1.50973600   | 10.03315400 |
| H | -8.04019500  | 0.93765600   | 10.55361300 |
| H | -4.53338500  | -2.97859500  | 14.05883900 |
| H | -5.42222400  | -4.16440000  | 13.05805600 |
| H | -3.80871900  | -3.58842400  | 12.54202500 |
| H | 4.86171500   | -9.61940800  | 3.01359100  |
| H | 3.26430500   | -8.88199400  | 3.33309300  |
| H | 3.68030300   | -10.46490500 | 4.05632100  |
| H | 3.33612000   | -12.31415800 | -1.97460400 |
| H | 2.05489800   | -13.33419300 | -1.25647500 |
| H | 1.63775000   | -11.75493500 | -1.98697400 |

[(C<sub>60</sub>)<sub>2</sub> ⊂ 1']

|                                            |                             |
|--------------------------------------------|-----------------------------|
| Zero-point correction=                     | 1.999241 (Hartree/Particle) |
| Thermal correction to Energy=              | 2.122814                    |
| Thermal correction to Enthalpy=            | 2.123759                    |
| Thermal correction to Gibbs Free Energy=   | 1.849991                    |
| Sum of electronic and zero-point Energies= | -8998.524277                |

Sum of electronic and thermal Energies= -8998.400703  
 Sum of electronic and thermal Enthalpies= -8998.399759  
 Sum of electronic and thermal Free Energies= -8998.673526

|   |             |             |             |
|---|-------------|-------------|-------------|
| C | 6.87804500  | -6.13521200 | 2.48335600  |
| C | 5.69551800  | -5.84134000 | 3.11822400  |
| H | 5.66190300  | -5.49980300 | 4.14435200  |
| C | 4.46525500  | -5.89599800 | 2.40946600  |
| C | 4.46459100  | -6.30043200 | 1.03471600  |
| C | 5.68929300  | -6.66814900 | 0.41543800  |
| H | 5.65076100  | -6.94830900 | -0.62894300 |
| C | 6.87405600  | -6.56679200 | 1.10274500  |
| C | -6.89264600 | -2.62455700 | -6.23580000 |
| C | -5.69847600 | -3.23740600 | -5.94216200 |
| H | -5.63975300 | -4.27814500 | -5.65158600 |
| C | -4.49086900 | -2.48873400 | -5.92965100 |
| C | -4.51778600 | -1.10292400 | -6.28914500 |
| C | -5.75645900 | -0.49568500 | -6.62591700 |
| H | -5.74340900 | 0.56056800  | -6.85987300 |
| C | -6.92286700 | -1.22064200 | -6.57813600 |
| C | 6.79942500  | 6.19694900  | -2.56346100 |
| C | 5.60504600  | 5.92133100  | -3.18459600 |
| H | 5.55255600  | 5.60142300  | -4.21691800 |
| C | 4.38995900  | 5.94906400  | -2.44957500 |
| C | 4.41097500  | 6.33644300  | -1.07153000 |
| C | 5.64918300  | 6.67098400  | -0.46012200 |
| H | 5.62992400  | 6.92590100  | 0.59130500  |
| C | 6.82251100  | 6.57395400  | -1.16806700 |
| C | -6.81419200 | 2.55622500  | 6.27114900  |
| C | -5.62413800 | 3.17999800  | 5.98244000  |
| H | -5.57342800 | 4.22297400  | 5.69866400  |
| C | -4.41001900 | 2.44218700  | 5.97012300  |
| C | -4.42859500 | 1.05175000  | 6.31287700  |
| C | -5.66228000 | 0.43415500  | 6.64917000  |
| H | -5.64143300 | -0.62353800 | 6.87598700  |
| C | -6.83422000 | 1.15133100  | 6.60800100  |
| N | -3.30791900 | 0.30469700  | 6.25078500  |
| N | 3.33285000  | -5.48624500 | 3.01637800  |
| N | 3.33841800  | -6.25408800 | 0.29645000  |
| N | -3.35388500 | -3.07317700 | -5.49989500 |
| N | -3.40381100 | -0.34477900 | -6.22766600 |
| N | 3.25346900  | 5.51815100  | -3.03476500 |
| N | 3.29225200  | 6.29206200  | -0.31896300 |
| N | -3.27467400 | 3.04103600  | 5.55745800  |
| C | -2.17990800 | 2.28953100  | 5.47410700  |
| C | -2.19356300 | 0.90168800  | 5.83424500  |



|   |             |             |             |
|---|-------------|-------------|-------------|
| C | -0.98000700 | 0.10696400  | 5.65477400  |
| C | 0.25826100  | 0.77572200  | 5.48772700  |
| C | 2.22850300  | -5.43592500 | 2.27801400  |
| C | 2.23272200  | -5.81813000 | 0.89536100  |
| C | 1.01164400  | -5.65884400 | 0.11031200  |
| C | -0.22436400 | -5.51461200 | 0.78788100  |
| C | -2.26625900 | -2.31176700 | -5.41672800 |
| C | -2.28850400 | -0.92677500 | -5.79300600 |
| C | -1.08110500 | -0.12137900 | -5.61243800 |
| C | 0.16140400  | -0.78521900 | -5.45582000 |
| C | 2.16075000  | 5.45513100  | -2.27880600 |
| C | 2.18134300  | 5.84983400  | -0.89956200 |
| C | 0.97510900  | 5.67638500  | -0.09377700 |
| C | -0.27024800 | 5.51907400  | -0.75113200 |
| C | -0.96408100 | 2.86341700  | 4.90404000  |
| C | -1.04267100 | 3.97823000  | 4.05396700  |
| C | 0.26549600  | 2.18464100  | 5.08626500  |
| C | 0.07643000  | 4.45364000  | 3.36227700  |
| H | -2.03263200 | 4.37649200  | 3.87145700  |
| C | -0.04853400 | 5.19433800  | 2.07592400  |
| C | 1.00531200  | -4.88715500 | 2.85888600  |
| C | 1.07946000  | -4.02429000 | 3.96278000  |
| C | -0.22755500 | -5.09932800 | 2.19367800  |
| C | -0.04744900 | -3.34882900 | 4.44370100  |
| H | 2.07090200  | -3.81842700 | 4.34620000  |
| C | 0.06419700  | -2.05426100 | 5.17277000  |
| C | 0.93464800  | 4.88804000  | -2.83685500 |
| C | 0.99392900  | 4.01830400  | -3.93694300 |
| C | -0.29061000 | 5.10516000  | -2.15811800 |
| C | -0.14061700 | 3.34071200  | -4.40117300 |
| H | 1.97982500  | 3.81332900  | -4.33438300 |
| C | -0.04076500 | 2.04347500  | -5.12891400 |
| C | -1.04173000 | -2.87802600 | -4.85559400 |
| C | -1.09717100 | -3.99126000 | -4.00206100 |
| C | 0.18161200  | -2.19727600 | -5.06634900 |
| C | 0.03956200  | -4.45903000 | -3.33186800 |
| H | -2.08118300 | -4.39349600 | -3.79747800 |
| C | -0.05569200 | -5.19839800 | -2.04259300 |
| C | -1.30055300 | -5.35926700 | -1.38865700 |
| H | -2.22456500 | -5.23970900 | -1.94153100 |
| C | 1.21257000  | 1.39988300  | -5.26671000 |
| H | 2.12759500  | 1.96369200  | -5.13549900 |
| C | -1.30662600 | 5.33959000  | 1.44377800  |
| H | -2.21981100 | 5.20218500  | 2.01029900  |
| C | 1.31714900  | -1.40729500 | 5.30158800  |
| H | 2.23460100  | -1.96619700 | 5.16264500  |

|   |             |             |             |
|---|-------------|-------------|-------------|
| C | 1.08053900  | -5.50052700 | -1.28189600 |
| H | 2.07046100  | -5.50802500 | -1.71950800 |
| C | 1.28105500  | -3.94066400 | -3.77340000 |
| H | 2.20838600  | -4.31798200 | -3.35896600 |
| C | -1.29649400 | -3.78531600 | 3.94082400  |
| H | -2.21418900 | -3.36296700 | 4.33127500  |
| C | -1.06064500 | -1.28551200 | 5.49413700  |
| H | -2.05354800 | -1.71716700 | 5.51922300  |
| C | 1.32893900  | 3.93647700  | 3.77437900  |
| H | 2.24331500  | 4.32720300  | 3.34635700  |
| C | 1.07044900  | 5.51122800  | 1.29591400  |
| H | 2.06822900  | 5.52547800  | 1.71605500  |
| C | -1.38194400 | 3.78703100  | -3.88929700 |
| H | -2.30633400 | 3.36560800  | -4.26332900 |
| C | -1.16612400 | 1.27122300  | -5.44416700 |
| H | -2.16031800 | 1.70083400  | -5.46114500 |
| H | -2.36438000 | -4.82993700 | 2.43154400  |
| H | -2.36147300 | -5.53370100 | 0.44451600  |
| H | 2.39434100  | 0.41886200  | 5.44937100  |
| H | 2.40077200  | 2.42030200  | 4.80604500  |
| H | -2.40195200 | 5.49657300  | -0.36859600 |
| H | -2.43039900 | 4.86116700  | -2.38682600 |
| H | 2.29590300  | -0.42106900 | -5.40913900 |
| H | 2.32283400  | -2.43496900 | -4.84550200 |
| C | -1.38414900 | -4.63111300 | 2.84891500  |
| C | -1.38133100 | -5.52036300 | -0.01543900 |
| C | 1.42078800  | 2.83807300  | 4.61037400  |
| C | 1.41071300  | -0.03558300 | 5.45798300  |
| C | -1.41342600 | 5.50355400  | 0.07252000  |
| C | -1.45504800 | 4.64374400  | -2.80421000 |
| C | 1.31060300  | 0.02931200  | -5.42392200 |
| C | 1.34860100  | -2.85073500 | -4.62258700 |
| O | -8.06852100 | 0.64557000  | 6.83100400  |
| O | -8.03295600 | 3.14118700  | 6.23539000  |
| O | 8.10850100  | -6.02986500 | 3.03349400  |
| O | 8.10142500  | -6.80244700 | 0.58677100  |
| O | -8.10702100 | -3.21963500 | -6.20635100 |
| O | -8.16124800 | -0.72461300 | -6.80116700 |
| O | 8.01961600  | 6.10686700  | -3.13932200 |
| O | 8.06108900  | 6.77005000  | -0.66111300 |
| C | 8.18379600  | -7.04907900 | -0.81078400 |
| H | 9.24740200  | -7.14095500 | -1.03351000 |
| H | 7.66922600  | -7.97882200 | -1.08352800 |
| H | 7.75428100  | -6.21520200 | -1.38032300 |
| C | 8.19784600  | -5.42321800 | 4.31629400  |
| H | 7.75761700  | -4.41825800 | 4.30207900  |

|   |             |             |             |
|---|-------------|-------------|-------------|
| H | 7.69809800  | -6.03013000 | 5.08147000  |
| H | 9.26329800  | -5.35869500 | 4.53996600  |
| C | -8.17358400 | -0.76079600 | 7.00752300  |
| H | -7.65078200 | -1.08972800 | 7.91424800  |
| H | -9.23973600 | -0.96874800 | 7.10425200  |
| H | -7.76686300 | -1.29536000 | 6.13979200  |
| C | -8.10134000 | 4.47378500  | 5.74568000  |
| H | -7.69534700 | 4.53670400  | 4.72809300  |
| H | -9.16059500 | 4.73312500  | 5.73856100  |
| H | -7.55717600 | 5.16784300  | 6.39823200  |
| C | -8.16428800 | -4.55869800 | -5.73457400 |
| H | -9.22058600 | -4.82998600 | -5.73856000 |
| H | -7.60722200 | -5.23794800 | -6.39190500 |
| H | -7.76519900 | -4.63135800 | -4.71491000 |
| C | -8.27499700 | 0.67914600  | -6.99155700 |
| H | -9.34274800 | 0.88037000  | -7.08532100 |
| H | -7.86673700 | 1.22465700  | -6.13147400 |
| H | -7.75827300 | 1.00144900  | -7.90420200 |
| C | 8.08097800  | 5.56984800  | -4.45389800 |
| H | 7.56190600  | 6.21493700  | -5.17365800 |
| H | 9.14108300  | 5.52065600  | -4.70505700 |
| H | 7.64332300  | 4.56400700  | -4.48585900 |
| C | 8.16873400  | 6.93530900  | 0.74675300  |
| H | 9.23717800  | 6.99531600  | 0.95725000  |
| H | 7.67672200  | 7.85738800  | 1.08041200  |
| H | 7.73235700  | 6.07730000  | 1.27364800  |
| C | 4.40732200  | 2.02482600  | 2.78842300  |
| C | 3.77381700  | 2.77293200  | 1.71312300  |
| C | 2.64492400  | 2.25590700  | 1.07264800  |
| C | 2.09828700  | 0.97034700  | 1.48115100  |
| C | 2.70943100  | 0.25204400  | 2.50766200  |
| C | 3.88613400  | 0.79069500  | 3.17507000  |
| C | 5.84752000  | 2.20631400  | 2.68119500  |
| C | 6.10644000  | 3.06657700  | 1.53658800  |
| C | 4.82465900  | 3.41128600  | 0.94009700  |
| C | 4.70770800  | 3.49401300  | -0.44491000 |
| C | 2.51855200  | 2.35812900  | -0.37145300 |
| C | 1.63675300  | 0.27605200  | 0.28707100  |
| C | 1.80027900  | -1.10585100 | 0.17528300  |
| C | 2.43459200  | -1.85181400 | 1.25207700  |
| C | 2.87822200  | -1.18699000 | 2.39353800  |
| C | 4.16054100  | -1.53728700 | 2.99223500  |
| C | 4.78212800  | -0.31422600 | 3.47775200  |
| C | 6.16442600  | -0.14112000 | 3.37422500  |
| C | 6.70740600  | 1.14486000  | 2.96581000  |
| C | 7.21651100  | 2.83091600  | 0.72228800  |

|   |             |             |             |
|---|-------------|-------------|-------------|
| C | 8.11144400  | 1.72191400  | 1.01790300  |
| C | 7.86377100  | 0.89786900  | 2.11667900  |
| C | 8.03642400  | -0.54183500 | 1.99945300  |
| C | 6.98626800  | -1.18398200 | 2.77849500  |
| C | 6.39103600  | -2.35542200 | 2.31106500  |
| C | 4.95008300  | -2.53005600 | 2.41669600  |
| C | 4.49289000  | -3.21037000 | 1.21756200  |
| C | 3.26070900  | -2.89048200 | 0.65198200  |
| C | 1.89246500  | 1.13563200  | -0.85977800 |
| C | 4.50340300  | -2.17039800 | -2.75044200 |
| C | 3.64499900  | -1.10611000 | -3.02625700 |
| C | 4.18821700  | 0.17739600  | -3.43717000 |
| C | 5.56881400  | 0.34952900  | -3.55103900 |
| C | 6.46522200  | -0.75641700 | -3.25411900 |
| C | 6.57577800  | -2.73836500 | -1.78737200 |
| C | 5.52521900  | -3.37781400 | -1.01205600 |
| C | 4.24241800  | -3.03208900 | -1.60725800 |
| C | 3.13379900  | -2.79085500 | -0.79356000 |
| C | 2.23217200  | -1.68613000 | -1.08835300 |
| C | 2.48303300  | -0.85990600 | -2.18375900 |
| C | 3.36559000  | 1.21911100  | -2.84088600 |
| C | 3.96105000  | 2.38842000  | -2.37836200 |
| C | 5.40147700  | 2.56703200  | -2.49023200 |
| C | 6.19009800  | 1.57348700  | -3.06763800 |
| C | 7.47138800  | 1.22336900  | -2.46901900 |
| C | 7.64016400  | -0.21699300 | -2.58479100 |
| C | 8.24509000  | -0.93394700 | -1.55162200 |
| C | 7.70355000  | -2.22162700 | -1.14491200 |
| C | 5.64566600  | -3.46010400 | 0.37290000  |
| C | 6.82117700  | -2.93510400 | 1.04486800  |
| C | 7.82921100  | -2.32356900 | 0.30099600  |
| C | 8.44851900  | -1.09907500 | 0.78859100  |
| C | 8.70571900  | -0.24100900 | -0.35744100 |
| C | 8.54143000  | 1.14014800  | -0.24534000 |
| C | 7.91196000  | 1.88709900  | -1.32311700 |
| C | 7.09164000  | 2.92995700  | -0.72476900 |
| C | 5.86165400  | 3.25125100  | -1.29252100 |
| C | 2.30896600  | 0.57823100  | -2.06798600 |
| C | 3.53279900  | 2.96192500  | -1.11166500 |
| C | 5.94361300  | -1.99015400 | -2.86358900 |
| C | -5.56949200 | 1.67705100  | 3.12174100  |
| C | -6.04368600 | 2.67961000  | 2.18215800  |
| C | -7.23358600 | 2.46826600  | 1.48353900  |
| C | -7.99843800 | 1.24936100  | 1.70320500  |
| C | -7.54372000 | 0.29362000  | 2.61332000  |
| C | -6.30403900 | 0.51389200  | 3.33999800  |

|   |             |             |             |
|---|-------------|-------------|-------------|
| C | -4.12134000 | 1.61350500  | 3.01641000  |
| C | -3.69340200 | 2.57740700  | 2.01950500  |
| C | -4.88304100 | 3.23576600  | 1.49840100  |
| C | -4.96180300 | 3.55414600  | 0.14293400  |
| C | -7.31353200 | 2.80126800  | 0.06873100  |
| C | -8.55010800 | 0.82911500  | 0.42434800  |
| C | -8.62713400 | -0.52767100 | 0.10813100  |
| C | -8.15440100 | -1.52391200 | 1.05754800  |
| C | -7.62442800 | -1.12229600 | 2.28403600  |
| C | -6.43402600 | -1.77510000 | 2.81065200  |
| C | -5.61727300 | -0.76399000 | 3.46237200  |
| C | -4.22667900 | -0.82055200 | 3.36365400  |
| C | -3.46195600 | 0.39569000  | 3.13678000  |
| C | -2.62733300 | 2.27242900  | 1.17250000  |
| C | -1.93313300 | 0.99863500  | 1.29706700  |
| C | -2.34436800 | 0.07852800  | 2.26238300  |
| C | -2.42725600 | -1.33584200 | 1.93277400  |
| C | -3.59133500 | -1.88892600 | 2.61298600  |
| C | -4.37556000 | -2.85926300 | 1.98861400  |
| C | -5.82517200 | -2.80313900 | 2.08847800  |
| C | -6.37992600 | -3.22225100 | 0.81021500  |
| C | -7.52055100 | -2.59670500 | 0.30564400  |
| C | -8.12779800 | 1.78801700  | -0.58560400 |
| C | -6.11637800 | -1.60618600 | -2.96474500 |
| C | -6.77527800 | -0.38371200 | -3.08782500 |
| C | -6.00799900 | 0.83539800  | -3.30616200 |
| C | -4.61647400 | 0.77620400  | -3.38733500 |
| C | -3.93349200 | -0.49820700 | -3.25180700 |
| C | -4.18952300 | -2.66273900 | -2.11267600 |
| C | -5.34876100 | -3.22267500 | -1.43336600 |
| C | -6.54003700 | -2.56959300 | -1.96019900 |
| C | -7.60284100 | -2.26329000 | -1.10871300 |
| C | -8.28683300 | -0.98462300 | -1.23063800 |
| C | -7.88198900 | -0.06518100 | -2.19951200 |
| C | -6.64304900 | 1.90631900  | -2.55411500 |
| C | -5.86046800 | 2.87649800  | -1.92512200 |
| C | -4.41030600 | 2.81315700  | -2.01968000 |
| C | -3.79907300 | 1.78598900  | -2.73853100 |
| C | -2.60453700 | 1.13540600  | -2.21454600 |
| C | -2.68722900 | -0.27884800 | -2.53925400 |
| C | -2.22536400 | -1.23570600 | -1.63703400 |
| C | -3.00010800 | -2.44841000 | -1.41545000 |
| C | -5.27097000 | -3.54093900 | -0.07765000 |
| C | -4.03236400 | -3.31277700 | 0.65070400  |
| C | -2.92346600 | -2.77562800 | -0.00253500 |
| C | -2.09582300 | -1.77387300 | 0.65175600  |

|   |             |             |             |
|---|-------------|-------------|-------------|
| C | -1.66962500 | -0.81626900 | -0.35884700 |
| C | -1.59197200 | 0.54119600  | -0.04312100 |
| C | -2.06938600 | 1.53698500  | -0.99218000 |
| C | -2.71356300 | 2.60123200  | -0.23971300 |
| C | -3.85508600 | 3.22698200  | -0.74199000 |
| C | -7.80090600 | 1.35042500  | -1.86946200 |
| C | -6.20273900 | 3.33323800  | -0.58706400 |
| C | -4.66605200 | -1.66145000 | -3.05035200 |

1'' (1,3-alternate, R= 3,5-di-*tert*-butylphenyl)

|                                              |                             |
|----------------------------------------------|-----------------------------|
| Zero-point correction=                       | 3.478261 (Hartree/Particle) |
| Thermal correction to Energy=                | 3.668941                    |
| Thermal correction to Enthalpy=              | 3.669885                    |
| Thermal correction to Gibbs Free Energy=     | 3.222534                    |
| Sum of electronic and zero-point Energies=   | -8427.058721                |
| Sum of electronic and thermal Energies=      | -8426.868041                |
| Sum of electronic and thermal Enthalpies=    | -8426.867097                |
| Sum of electronic and thermal Free Energies= | -8427.314448                |

|   |             |             |              |
|---|-------------|-------------|--------------|
| C | 16.11265800 | 10.85098300 | 4.24672200   |
| C | 16.02945500 | 11.19605800 | 2.92439400   |
| C | 14.79581800 | 11.10019200 | 2.23186400   |
| C | 13.64174300 | 10.61109800 | 2.92261200   |
| C | 13.75439100 | 10.24687800 | 4.28838500   |
| C | 14.95037300 | 10.36878100 | 4.94387600   |
| C | 5.12666500  | 5.22753800  | -7.03788000  |
| C | 5.90101600  | 4.41678400  | -6.24968900  |
| C | 6.35138800  | 4.86139100  | -4.98156000  |
| C | 5.99527000  | 6.17208600  | -4.53077100  |
| C | 5.20195900  | 6.99802500  | -5.36582900  |
| C | 4.76772900  | 6.54311000  | -6.58293500  |
| C | 18.66866900 | 1.22401900  | 1.07183100   |
| C | 18.57347800 | 1.68451000  | -0.21449400  |
| C | 17.35560300 | 1.57257600  | -0.93220200  |
| C | 16.21325700 | 1.00088500  | -0.28786700  |
| C | 16.33056100 | 0.53874900  | 1.04711100   |
| C | 17.52240800 | 0.63547300  | 1.71404500   |
| C | 13.21352400 | 8.80320200  | -11.76400600 |
| C | 14.09385600 | 8.06037200  | -11.02395200 |
| C | 14.53576400 | 8.52035900  | -9.75736900  |
| C | 14.06413800 | 9.77929400  | -9.26599000  |
| C | 13.12592400 | 10.51475800 | -10.03407800 |
| C | 12.70810400 | 10.04922300 | -11.25187700 |
| N | 14.50673400 | 10.26708200 | -8.07472300  |

|   |             |             |             |
|---|-------------|-------------|-------------|
| N | 14.71290100 | 11.47878000 | 0.92667500  |
| N | 12.44551900 | 10.50145600 | 2.28097200  |
| N | 7.12773300  | 4.05143400  | -4.20926500 |
| N | 6.42464600  | 6.62879700  | -3.32240200 |
| N | 17.28020700 | 2.00365800  | -2.22151300 |
| N | 15.02572900 | 0.89960000  | -0.94618500 |
| N | 15.39598100 | 7.76815400  | -9.01733600 |
| C | 15.83513300 | 8.26873700  | -7.85667900 |
| C | 15.40274900 | 9.54710700  | -7.38893400 |
| C | 15.89925600 | 10.04521600 | -6.10840400 |
| C | 16.98904900 | 9.40002300  | -5.47133300 |
| C | 13.51869100 | 11.41913800 | 0.32612500  |
| C | 12.37009300 | 10.91641400 | 1.01112700  |
| C | 11.10903000 | 10.78843200 | 0.28465100  |
| C | 10.93553200 | 11.46212200 | -0.94979300 |
| C | 7.51542500  | 4.50147400  | -3.01048800 |
| C | 7.15727500  | 5.80941700  | -2.55980000 |
| C | 7.67154000  | 6.28878300  | -1.27941800 |
| C | 8.26155200  | 5.38049300  | -0.36601600 |
| C | 16.12247200 | 1.84674000  | -2.87392400 |
| C | 14.97551700 | 1.29652500  | -2.22294900 |
| C | 13.70658600 | 1.24045000  | -2.94465200 |
| C | 13.68777500 | 1.40264400  | -4.35203200 |
| C | 16.70128900 | 7.45747700  | -7.00458400 |
| C | 16.68106700 | 6.06311700  | -7.15271800 |
| C | 17.38436500 | 8.05533800  | -5.91725000 |
| C | 17.31075400 | 5.22057700  | -6.23350200 |
| C | 11.26768300 | 1.35159500  | -2.84013100 |
| C | 13.39773900 | 11.81139800 | -1.07579800 |
| C | 14.54650000 | 11.83762500 | -1.87919400 |
| C | 12.11499700 | 11.99243100 | -1.65016800 |
| C | 14.46903900 | 12.03478800 | -3.25988300 |
| C | 15.52176600 | 11.46100600 | -4.15262500 |
| C | 16.00689200 | 2.30613900  | -4.25580000 |
| C | 16.93028900 | 3.24200500  | -4.74384000 |
| C | 14.87746100 | 1.93987900  | -5.02959500 |
| C | 16.76969000 | 3.84617900  | -5.99318800 |
| C | 8.40121600  | 8.20055800  | 0.05674800  |
| C | 8.39003700  | 3.67643200  | -2.18011200 |
| C | 9.12418000  | 2.64599700  | -2.78508100 |
| C | 8.63142000  | 4.03440800  | -0.83019200 |
| C | 10.11657600 | 1.94803400  | -2.09294700 |
| C | 9.02151300  | 9.55929000  | -0.02995000 |
| C | 8.73655400  | 10.42439400 | -1.11710900 |
| C | 8.76801400  | 7.28359000  | 1.07433100  |
| C | 11.25553700 | 1.26099800  | -4.25536600 |

|   |             |             |              |
|---|-------------|-------------|--------------|
| C | 16.75120100 | 10.98396300 | -3.63208500  |
| C | 10.15744200 | 9.85755900  | 0.72667000   |
| C | 10.17391800 | 2.14977700  | -0.69045900  |
| C | 13.21758300 | 12.45796100 | -3.77454500  |
| C | 15.18807000 | 11.05653200 | -5.44713300  |
| C | 18.18976600 | 5.83618900  | -5.30636100  |
| C | 12.50915200 | 1.21139200  | -2.21492000  |
| C | 15.78724900 | 3.28497200  | -6.84838100  |
| C | 7.74269200  | 7.67080000  | -1.05502300  |
| C | 12.07555000 | 12.43490200 | -2.99192400  |
| C | 9.66779600  | 11.34610100 | -1.56368800  |
| C | 18.22504200 | 7.21214700  | -5.15503700  |
| C | 17.46017800 | 9.98160300  | -4.27246600  |
| C | 12.43052900 | 1.28666500  | -4.98735100  |
| C | 14.86851800 | 2.36193300  | -6.37834800  |
| C | 8.69938800  | 5.91578300  | 0.86712900   |
| C | 9.45312900  | 3.16252000  | -0.08004100  |
| O | 11.78387000 | 10.68076900 | -12.07433700 |
| O | 12.74174200 | 8.46235900  | -13.02506700 |
| O | 17.26372200 | 10.92882600 | 5.02116600   |
| O | 15.16094500 | 10.06787400 | 6.28389800   |
| O | 4.64789500  | 4.90187400  | -8.30037300  |
| O | 4.02119300  | 7.30378000  | -7.47817500  |
| O | 19.80297500 | 1.28000000  | 1.86932100   |
| O | 17.74743700 | 0.19307600  | 3.01167000   |
| H | 16.89124900 | 11.56465000 | 2.38778000   |
| H | 12.87233700 | 9.88747000  | 4.79758100   |
| H | 6.18022900  | 3.42437300  | -6.57079600  |
| H | 4.94030600  | 7.98558700  | -5.01430200  |
| H | 19.42211100 | 2.12367900  | -0.71751500  |
| H | 15.46164300 | 0.10179700  | 1.51664100   |
| H | 14.47456700 | 7.11779000  | -11.38891100 |
| H | 12.76201100 | 11.45190900 | -9.63944700  |
| H | 16.03058400 | 5.67721400  | -7.92519900  |
| H | 15.47278500 | 11.55889500 | -1.39619200  |
| H | 17.68842900 | 3.56977700  | -4.04620700  |
| H | 8.97667300  | 2.52039500  | -3.84862900  |
| H | 7.81534600  | 10.30536100 | -1.67371800  |
| H | 9.19602100  | 7.64827100  | 1.99996500   |
| H | 10.31239000 | 1.26373300  | -4.78736000  |
| H | 17.10626900 | 11.34305500 | -2.67396600  |
| H | 10.42285600 | 9.28423300  | 1.60420300   |
| H | 10.85881100 | 1.56494900  | -0.08912700  |
| H | 13.12679700 | 12.72108600 | -4.82119500  |
| H | 14.29096200 | 11.40643200 | -5.93877800  |
| H | 18.77843600 | 5.22501300  | -4.63358600  |



|   |             |             |              |
|---|-------------|-------------|--------------|
| H | 12.60784300 | 1.21803000  | -1.13826600  |
| H | 15.68694300 | 3.64613400  | -7.86429800  |
| H | 7.38884100  | 8.30000200  | -1.85958100  |
| H | 11.12559500 | 12.67466000 | -3.45276600  |
| H | 9.44762300  | 11.91451800 | -2.45849300  |
| H | 18.83648900 | 7.63101400  | -4.36584000  |
| H | 18.34569900 | 9.58400200  | -3.79269600  |
| H | 12.36793800 | 1.31465600  | -6.06787100  |
| H | 14.07715700 | 2.03403300  | -7.04061600  |
| H | 9.07914100  | 5.25548600  | 1.63659800   |
| H | 9.60137100  | 3.33909500  | 0.97783700   |
| C | 3.20700400  | 8.35468400  | -6.97641000  |
| C | 2.00077100  | 8.05058100  | -6.34600700  |
| C | 3.61113100  | 9.66335400  | -7.18449300  |
| C | 1.17092100  | 9.08390000  | -5.90778800  |
| H | 1.73070900  | 7.01283100  | -6.21776000  |
| C | 2.79324300  | 10.72457400 | -6.75838700  |
| H | 4.55133100  | 9.83804000  | -7.69016300  |
| C | 1.58826000  | 10.41181400 | -6.12277800  |
| H | 0.94811700  | 11.21447000 | -5.78520400  |
| C | 4.80487700  | 3.58605900  | -8.80877200  |
| C | 3.67114500  | 2.78690500  | -8.89305700  |
| C | 6.05052200  | 3.14261900  | -9.24197800  |
| C | 3.76656600  | 1.50188600  | -9.44114300  |
| H | 2.73370200  | 3.19111400  | -8.54179800  |
| C | 6.17793300  | 1.85586900  | -9.78040500  |
| H | 6.89790200  | 3.80731200  | -9.16184800  |
| C | 5.02642500  | 1.05993100  | -9.87182800  |
| H | 5.11311900  | 0.06564000  | -10.29259400 |
| C | 7.53082000  | 1.30489500  | -10.27493000 |
| C | 2.54291900  | 0.57330700  | -9.57606000  |
| C | 2.79428200  | -0.72704300 | -8.76612100  |
| H | 3.68216300  | -1.25391700 | -9.12960000  |
| H | 2.94080300  | -0.49188900 | -7.70648000  |
| H | 1.93159600  | -1.39696000 | -8.86222800  |
| C | 1.24893200  | 1.23226700  | -9.04439000  |
| H | 1.33682000  | 1.47583200  | -7.97972200  |
| H | 1.01172800  | 2.14577400  | -9.60092400  |
| H | 0.41492400  | 0.53228800  | -9.16609100  |
| C | 2.33056100  | 0.22401700  | -11.07379800 |
| H | 2.14786300  | 1.13514600  | -11.65350400 |
| H | 3.20824400  | -0.28076200 | -11.48972300 |
| H | 1.46574300  | -0.44147800 | -11.18117000 |
| C | 7.85879800  | -0.01179600 | -9.52067700  |
| H | 7.08887500  | -0.77036900 | -9.69212800  |
| H | 8.81847000  | -0.41018400 | -9.87072700  |

|   |             |             |              |
|---|-------------|-------------|--------------|
| H | 7.92721300  | 0.17438900  | -8.44349400  |
| C | 7.43776100  | 1.02535300  | -11.79909800 |
| H | 6.65139400  | 0.29599000  | -12.01815400 |
| H | 7.21259100  | 1.95020600  | -12.34095900 |
| H | 8.39206000  | 0.62586800  | -12.16371100 |
| C | 8.68949000  | 2.29950900  | -10.03144300 |
| H | 8.53255600  | 3.23602100  | -10.57793100 |
| H | 8.80139500  | 2.52401200  | -8.96476100  |
| H | 9.62487000  | 1.85373300  | -10.38729800 |
| C | 3.24973300  | 12.17618600 | -7.00818500  |
| C | 4.62055700  | 12.40883900 | -6.31786300  |
| H | 5.38059800  | 11.72463500 | -6.70813800  |
| H | 4.95822500  | 13.43679300 | -6.49847000  |
| H | 4.53470700  | 12.25215600 | -5.23720200  |
| C | 3.39051900  | 12.40574700 | -8.53698200  |
| H | 3.72494500  | 13.43243000 | -8.73095100  |
| H | 4.12162100  | 11.71749600 | -8.97269800  |
| H | 2.42827100  | 12.24890600 | -9.03595100  |
| C | 2.24621700  | 13.21273400 | -6.45204300  |
| H | 2.62471200  | 14.22077600 | -6.65471200  |
| H | 1.26660600  | 13.11419000 | -6.93274500  |
| H | 2.12489600  | 13.10546100 | -5.36837900  |
| C | -0.17594900 | 8.81607200  | -5.20655500  |
| C | -0.14585300 | 9.44287700  | -3.78640900  |
| H | 0.65611900  | 8.99413000  | -3.19056200  |
| H | 0.02142000  | 10.52350900 | -3.83475700  |
| H | -1.10234700 | 9.26361200  | -3.28118700  |
| C | -1.32148700 | 9.45572900  | -6.03657800  |
| H | -1.18160400 | 10.53672200 | -6.13635700  |
| H | -1.35407700 | 9.01643800  | -7.03940000  |
| H | -2.28333300 | 9.27614200  | -5.54169500  |
| C | -0.46867800 | 7.30458800  | -5.06202200  |
| H | -0.52497900 | 6.81643300  | -6.04142900  |
| H | 0.29955700  | 6.80783700  | -4.45909700  |
| H | -1.43353100 | 7.17342100  | -4.55981900  |
| C | 18.46450800 | 11.40477900 | 4.42878600   |
| C | 18.74276500 | 12.76980000 | 4.46797200   |
| C | 19.35017600 | 10.49397700 | 3.87615700   |
| C | 19.94595300 | 13.24446000 | 3.94050900   |
| H | 18.01732300 | 13.43089100 | 4.91834800   |
| C | 20.57151600 | 10.94146800 | 3.34457700   |
| H | 19.08701500 | 9.44477800  | 3.88339600   |
| C | 20.84252300 | 12.31294000 | 3.38303600   |
| H | 21.77574400 | 12.67524600 | 2.97553000   |
| C | 14.07134800 | 9.60164400  | 7.06779600   |
| C | 13.85466100 | 8.23295600  | 7.17341600   |

|   |             |             |             |
|---|-------------|-------------|-------------|
| C | 13.28050300 | 10.52647100 | 7.73989500  |
| C | 12.81980700 | 7.75717800  | 7.98871100  |
| H | 14.50604600 | 7.56407700  | 6.63090900  |
| C | 12.23657000 | 10.07928900 | 8.55947000  |
| H | 13.50056400 | 11.57699100 | 7.62138100  |
| C | 12.02652800 | 8.69608200  | 8.66466500  |
| H | 11.22179700 | 8.33899200  | 9.29570400  |
| C | 11.32648400 | 11.05246300 | 9.33579700  |
| C | 11.44222200 | 10.75879100 | 10.85580700 |
| H | 10.79356200 | 11.44231400 | 11.41644300 |
| H | 11.14026300 | 9.73173700  | 11.08400800 |
| H | 12.47527600 | 10.89887700 | 11.19164100 |
| C | 9.85704700  | 10.85524400 | 8.87513700  |
| H | 9.19993200  | 11.53764900 | 9.42718200  |
| H | 9.76327900  | 11.06632000 | 7.80451400  |
| H | 9.52024900  | 9.82968200  | 9.05678300  |
| C | 11.71449400 | 12.53032700 | 9.09740800  |
| H | 12.73951100 | 12.72962600 | 9.42941000  |
| H | 11.62374300 | 12.79877700 | 8.03902100  |
| H | 11.03900200 | 13.17443100 | 9.67114700  |
| C | 12.53452200 | 6.25129800  | 8.15855000  |
| C | 13.52260100 | 5.37765000  | 7.35226700  |
| H | 13.45075800 | 5.58348700  | 6.27845300  |
| H | 14.55538100 | 5.54254600  | 7.67890500  |
| H | 13.28110400 | 4.32108800  | 7.51174600  |
| C | 11.09589800 | 5.94469700  | 7.66220700  |
| H | 10.35281800 | 6.51425000  | 8.22920800  |
| H | 10.99681800 | 6.20476000  | 6.60284800  |
| H | 10.87957600 | 4.87654300  | 7.78444300  |
| C | 12.66301900 | 5.87130400  | 9.65820800  |
| H | 13.67637900 | 6.08088700  | 10.01692400 |
| H | 11.95479900 | 6.43702100  | 10.27159600 |
| H | 12.45663600 | 4.80237200  | 9.78971900  |
| C | 21.56681600 | 9.91133700  | 2.77392000  |
| C | 20.31593800 | 14.74119700 | 3.95348300  |
| C | 19.21315600 | 15.60939500 | 4.60260500  |
| H | 18.26875200 | 15.52695900 | 4.05324400  |
| H | 19.04503200 | 15.32151000 | 5.64638200  |
| H | 19.52718400 | 16.65887500 | 4.58482500  |
| C | 21.62716900 | 14.93717700 | 4.76139800  |
| H | 22.45278400 | 14.37140300 | 4.31830200  |
| H | 21.90186900 | 15.99866700 | 4.77128100  |
| H | 21.49022200 | 14.59931200 | 5.79423400  |
| C | 20.52298700 | 15.22948600 | 2.49431700  |
| H | 19.60124500 | 15.10133100 | 1.91675600  |
| H | 20.79387500 | 16.29196100 | 2.49337800  |

|   |             |             |              |
|---|-------------|-------------|--------------|
| H | 21.32271200 | 14.66925800 | 1.99966800   |
| C | 20.87625800 | 9.07487400  | 1.66353200   |
| H | 20.55864500 | 9.72382500  | 0.84022200   |
| H | 21.57749500 | 8.32768000  | 1.27299300   |
| H | 19.99689700 | 8.55009400  | 2.04937700   |
| C | 22.82102500 | 10.57967700 | 2.16449800   |
| H | 23.48096700 | 9.80171600  | 1.76462800   |
| H | 22.55120900 | 11.25416700 | 1.34414800   |
| H | 23.37942200 | 11.14248300 | 2.92072700   |
| C | 22.02360900 | 8.97480200  | 3.92512200   |
| H | 22.51917800 | 9.55483800  | 4.71108900   |
| H | 21.16994000 | 8.45180200  | 4.36787400   |
| H | 22.72626600 | 8.22614800  | 3.54107900   |
| C | 13.18277400 | 7.25526600  | -13.63110100 |
| C | 14.32238600 | 7.28067100  | -14.42699900 |
| C | 12.43419600 | 6.09775000  | -13.45347000 |
| C | 14.73651200 | 6.11395000  | -15.08144100 |
| H | 14.85862900 | 8.21216200  | -14.53129800 |
| C | 12.82178600 | 4.91755600  | -14.10113600 |
| H | 11.55407200 | 6.14262000  | -12.82937500 |
| C | 13.97334900 | 4.95063900  | -14.90146600 |
| H | 14.28336800 | 4.04282300  | -15.40441300 |
| C | 11.20633700 | 11.90787600 | -11.65054000 |
| C | 10.01079400 | 11.86757900 | -10.94299600 |
| C | 11.82461600 | 13.10683500 | -11.98437200 |
| C | 9.39020000  | 13.06282700 | -10.56060600 |
| H | 9.57958500  | 10.90382500 | -10.71695600 |
| C | 11.22728700 | 14.31867900 | -11.61295600 |
| H | 12.75154100 | 13.07556400 | -12.53748700 |
| C | 10.01713200 | 14.26997500 | -10.90419800 |
| H | 9.54715400  | 15.20158100 | -10.61333100 |
| C | 15.98809700 | 6.07608100  | -15.98150700 |
| C | 16.69557400 | 7.44918200  | -16.05530500 |
| H | 17.57394700 | 7.36459200  | -16.70463800 |
| H | 16.03344400 | 8.21438100  | -16.47559600 |
| H | 17.03379500 | 7.77471100  | -15.06529300 |
| C | 15.57123000 | 5.66590100  | -17.41961900 |
| H | 14.86316000 | 6.39313900  | -17.83116600 |
| H | 16.45571300 | 5.62996500  | -18.06669700 |
| H | 15.09765200 | 4.67909100  | -17.42740700 |
| C | 16.99534200 | 5.04037800  | -15.41319800 |
| H | 16.55344900 | 4.03970100  | -15.37402600 |
| H | 17.88619700 | 4.99997100  | -16.05114800 |
| H | 17.30086400 | 5.32417700  | -14.40042200 |
| C | 12.02642000 | 3.60382000  | -13.96217500 |
| C | 12.94196300 | 2.51488100  | -13.34097900 |

|   |             |             |              |
|---|-------------|-------------|--------------|
| H | 12.38844700 | 1.57295600  | -13.24643000 |
| H | 13.82278600 | 2.33604800  | -13.96567000 |
| H | 13.28042300 | 2.82588000  | -12.34673300 |
| C | 10.78368200 | 3.76751300  | -13.05714000 |
| H | 11.06825400 | 4.06255500  | -12.04093200 |
| H | 10.09272400 | 4.51395100  | -13.46466100 |
| H | 10.25427700 | 2.81024600  | -12.99732300 |
| C | 11.54653000 | 3.14533900  | -15.36570100 |
| H | 10.89677500 | 3.90614200  | -15.81122500 |
| H | 12.39379000 | 2.97708300  | -16.03781500 |
| H | 10.98352400 | 2.20848000  | -15.27805300 |
| C | 8.05737000  | 13.08120900 | -9.78500100  |
| C | 8.26465500  | 13.80166000 | -8.42555800  |
| H | 7.32096700  | 13.82041900 | -7.86738800  |
| H | 9.01574500  | 13.27409200 | -7.82779400  |
| H | 8.60048400  | 14.83315200 | -8.57212600  |
| C | 7.53104400  | 11.65459700 | -9.50212400  |
| H | 7.34352900  | 11.10865000 | -10.43331500 |
| H | 8.23847700  | 11.08394200 | -8.89024200  |
| H | 6.58572200  | 11.72568000 | -8.95339500  |
| C | 6.98950600  | 13.83737400 | -10.62050000 |
| H | 6.83528700  | 13.33561500 | -11.58173800 |
| H | 6.03728200  | 13.85638400 | -10.07707700 |
| H | 7.29817800  | 14.86958500 | -10.81424300 |
| C | 11.85558500 | 15.68401000 | -11.95888100 |
| C | 10.86768400 | 16.49050400 | -12.84425000 |
| H | 10.66474100 | 15.94996500 | -13.77496400 |
| H | 9.91785300  | 16.65594000 | -12.32600000 |
| H | 11.30178300 | 17.46673600 | -13.09095900 |
| C | 12.13912800 | 16.46435500 | -10.64706900 |
| H | 12.84073400 | 15.90653500 | -10.01761200 |
| H | 12.57829900 | 17.44083800 | -10.88332700 |
| H | 11.21868600 | 16.62889600 | -10.07801500 |
| C | 13.18733500 | 15.53543500 | -12.73071200 |
| H | 13.58805900 | 16.53180100 | -12.94759200 |
| H | 13.93067000 | 14.99086900 | -12.13790600 |
| H | 13.03816400 | 15.01356200 | -13.68253000 |
| C | 21.04768900 | 1.70953900  | 1.34730700   |
| C | 21.64054400 | 2.80551700  | 1.97174700   |
| C | 21.67311000 | 1.03967200  | 0.30540900   |
| C | 22.89454300 | 3.25076300  | 1.55050800   |
| H | 21.10539600 | 3.27460400  | 2.78348700   |
| C | 22.92752100 | 1.47812100  | -0.15189800  |
| C | 23.51434600 | 2.57943100  | 0.47985300   |
| H | 24.47914900 | 2.92765900  | 0.13952700   |
| C | 16.68219100 | -0.41734000 | 3.72721400   |

|   |             |             |            |
|---|-------------|-------------|------------|
| C | 15.86567700 | 0.36725600  | 4.52492700 |
| C | 16.51133800 | -1.79744500 | 3.63320200 |
| C | 14.84196800 | -0.23196300 | 5.27857600 |
| H | 16.04432100 | 1.43358800  | 4.56106500 |
| C | 15.50158000 | -2.42026400 | 4.37023000 |
| H | 17.18027500 | -2.35694100 | 2.99630600 |
| C | 14.67934200 | -1.61751900 | 5.18381800 |
| H | 13.89639200 | -2.09466600 | 5.75608000 |
| C | 23.60108900 | 4.45264100  | 2.20865000 |
| C | 25.00389000 | 4.01697400  | 2.71133700 |
| H | 25.62896800 | 3.66071900  | 1.88674700 |
| H | 25.50873100 | 4.86836900  | 3.18305600 |
| H | 24.90922000 | 3.21201100  | 3.44790400 |
| C | 22.80822500 | 5.00353000  | 3.41617000 |
| H | 21.82073000 | 5.36749300  | 3.11183500 |
| H | 22.68289900 | 4.23751400  | 4.18937900 |
| H | 23.35771700 | 5.84473800  | 3.85291400 |
| C | 23.75168600 | 5.58959600  | 1.16202000 |
| H | 22.76552200 | 5.92296800  | 0.81971200 |
| H | 24.27485000 | 6.44263200  | 1.61157600 |
| H | 24.32418300 | 5.25156600  | 0.29234000 |
| C | 13.94738300 | 0.65354000  | 6.16870300 |
| C | 13.22022200 | 1.69812700  | 5.27957400 |
| H | 13.93692300 | 2.32633400  | 4.74147700 |
| H | 12.58230100 | 1.19350000  | 4.54589600 |
| H | 12.59427900 | 2.34725800  | 5.90344800 |
| C | 12.87762700 | -0.16532800 | 6.92759500 |
| H | 13.34053300 | -0.90373700 | 7.59166400 |
| H | 12.27614600 | 0.51461300  | 7.54116000 |
| H | 12.20560400 | -0.68119700 | 6.23273700 |
| C | 14.83335000 | 1.38343100  | 7.21371400 |
| H | 15.34022600 | 0.65604700  | 7.85684200 |
| H | 15.59277900 | 2.00170000  | 6.72511200 |
| H | 14.21099700 | 2.03417300  | 7.83953600 |
| C | 15.26503900 | -3.94290100 | 4.31851300 |
| C | 16.25942200 | -4.65619800 | 3.37318000 |
| H | 17.29392000 | -4.51263700 | 3.70451600 |
| H | 16.04683500 | -5.73096500 | 3.37527500 |
| H | 16.16026500 | -4.29130100 | 2.34481600 |
| C | 15.43820600 | -4.53551200 | 5.74305100 |
| H | 15.26566400 | -5.61806000 | 5.71817400 |
| H | 16.45305300 | -4.34915100 | 6.11047200 |
| H | 14.72771100 | -4.08903000 | 6.44587100 |
| C | 13.82518500 | -4.22031900 | 3.80826200 |
| H | 13.07788400 | -3.76625800 | 4.46666100 |
| H | 13.69405200 | -3.81133200 | 2.80071900 |

|   |             |             |             |
|---|-------------|-------------|-------------|
| H | 13.64508100 | -5.30137700 | 3.77532700  |
| C | 23.60436200 | 0.72979100  | -1.31818200 |
| C | 24.96241500 | 1.35777000  | -1.70912100 |
| H | 25.39330500 | 0.78752800  | -2.53945000 |
| H | 24.83884400 | 2.39606800  | -2.03687400 |
| H | 25.66997500 | 1.32927900  | -0.87303300 |
| C | 22.67576400 | 0.77221000  | -2.56180700 |
| H | 21.70916100 | 0.30351500  | -2.35234500 |
| H | 22.49853200 | 1.80872800  | -2.86853200 |
| H | 23.14526700 | 0.23514000  | -3.39440700 |
| C | 23.85124600 | -0.74518200 | -0.90123000 |
| H | 24.51001000 | -0.78743100 | -0.02718900 |
| H | 22.91121500 | -1.24675200 | -0.65051800 |
| H | 24.32442600 | -1.29044800 | -1.72648500 |
| H | 21.18543200 | 0.18481600  | -0.14369100 |

D 6 92 208 210 F  
 D 6 92 208 5 F  
 D 1 91 199 200 F  
 D 1 91 199 2 F  
 D 18 96 347 349 F  
 D 18 96 347 17 F  
 D 13 95 399 341 F  
 D 13 95 399 14 F  
 D 19 90 269 270 F  
 D 19 90 269 20 F  
 D 24 89 278 280 F  
 D 24 89 278 23 F  
 D 7 93 138 140 F  
 D 7 93 138 8 F  
 D 12 94 129 130 F  
 D 12 94 129 11 F

1'' (1,2-alternate, R=3,5-di-*tert*-butylphenyl)

|                                              |                             |
|----------------------------------------------|-----------------------------|
| Zero-point correction=                       | 3.478270 (Hartree/Particle) |
| Thermal correction to Energy=                | 3.666586                    |
| Thermal correction to Enthalpy=              | 3.667530                    |
| Thermal correction to Gibbs Free Energy=     | 3.234085                    |
| Sum of electronic and zero-point Energies=   | -8427.051090                |
| Sum of electronic and thermal Energies=      | -8426.862774                |
| Sum of electronic and thermal Enthalpies=    | -8426.861830                |
| Sum of electronic and thermal Free Energies= | -8427.295274                |

|   |            |             |             |
|---|------------|-------------|-------------|
| C | 8.70463400 | 13.58233700 | -6.45503300 |
|---|------------|-------------|-------------|

|   |             |             |              |
|---|-------------|-------------|--------------|
| C | 8.92257300  | 12.57362300 | -5.55471400  |
| C | 10.23351300 | 12.29829400 | -5.08792900  |
| C | 11.33072600 | 13.05624600 | -5.60554700  |
| C | 11.07212700 | 14.14406800 | -6.47577800  |
| C | 9.79566600  | 14.41081100 | -6.89344500  |
| C | 10.87096700 | 2.05195400  | 4.58799100   |
| C | 10.82958200 | 3.05854500  | 3.66033100   |
| C | 10.80177900 | 2.75485200  | 2.27416400   |
| C | 10.86960900 | 1.38735100  | 1.85920900   |
| C | 10.83770500 | 0.36192700  | 2.83710200   |
| C | 10.83089700 | 0.67571300  | 4.16944900   |
| C | 20.10175900 | 2.19813300  | 0.00857000   |
| C | 20.00910700 | 2.32041200  | -1.34837500  |
| C | 18.95286400 | 1.68771300  | -2.05111900  |
| C | 17.95677100 | 0.95662400  | -1.32817400  |
| C | 18.09003500 | 0.82096800  | 0.08119600   |
| C | 19.11715300 | 1.44147400  | 0.74037500   |
| C | 12.37045900 | 6.56169900  | -11.47815200 |
| C | 13.49151300 | 5.93856100  | -10.99657500 |
| C | 14.48978800 | 6.67788200  | -10.31571700 |
| C | 14.31060900 | 8.08350700  | -10.11029400 |
| C | 13.18148500 | 8.72187600  | -10.68306100 |
| C | 12.22271800 | 7.98307300  | -11.33356800 |
| N | 15.18774300 | 8.78325200  | -9.33555100  |
| N | 10.44293000 | 11.32715600 | -4.15633200  |
| N | 12.61153600 | 12.73975500 | -5.26585600  |
| N | 10.67935300 | 3.75138600  | 1.35321900   |
| N | 10.93340400 | 1.06753300  | 0.53652800   |
| N | 18.89197600 | 1.78912700  | -3.40394900  |
| N | 16.88560900 | 0.42283600  | -1.98213100  |
| N | 15.59731400 | 6.04716300  | -9.84276600  |
| C | 16.48381700 | 6.75982400  | -9.13932200  |
| C | 16.24678200 | 8.13519500  | -8.83519000  |
| C | 17.11271200 | 8.79814400  | -7.85952100  |
| C | 18.35800600 | 8.21953300  | -7.50336600  |
| C | 11.69813400 | 11.09160300 | -3.75727500  |
| C | 12.80321800 | 11.77149700 | -4.36458800  |
| C | 14.16296100 | 11.33092300 | -4.05602000  |
| C | 14.39092000 | 10.58114400 | -2.87554900  |
| C | 10.62908200 | 3.41471400  | 0.05913100   |
| C | 10.81557100 | 2.05541800  | -0.35562600  |
| C | 10.93937200 | 1.75718200  | -1.78128300  |
| C | 10.42800600 | 2.68963700  | -2.71718900  |
| C | 17.87212400 | 1.20288700  | -4.03979700  |
| C | 16.83273000 | 0.54338700  | -3.31602000  |
| C | 15.65003800 | 0.08732500  | -4.04901300  |



|   |             |             |              |
|---|-------------|-------------|--------------|
| C | 15.70079500 | -0.04041900 | -5.46209800  |
| C | 17.66282900 | 6.09220700  | -8.59704700  |
| C | 17.70110200 | 4.69102500  | -8.60778700  |
| C | 18.65514700 | 6.83292100  | -7.90737800  |
| C | 18.69625300 | 3.98342100  | -7.93691200  |
| C | 13.22323700 | -0.18592900 | -4.07913500  |
| C | 11.95140800 | 10.08817700 | -2.72453900  |
| C | 10.95141800 | 9.16177400  | -2.38617800  |
| C | 13.25111100 | 9.97605300  | -2.16804300  |
| C | 11.21774800 | 8.09549100  | -1.52287100  |
| C | 17.24854800 | 10.35237700 | -5.97972100  |
| C | 17.78395400 | 1.32018700  | -5.49115700  |
| C | 18.55140100 | 2.30251000  | -6.13369700  |
| C | 16.80502100 | 0.58955700  | -6.20753200  |
| C | 18.36534500 | 2.60155200  | -7.48174800  |
| C | 11.97612000 | 0.46174700  | -3.56548600  |
| C | 10.40593400 | 4.44915700  | -0.94991400  |
| C | 10.57774700 | 5.80618200  | -0.62816900  |
| C | 10.11444500 | 4.05903800  | -2.28198300  |
| C | 10.48750300 | 6.79613800  | -1.61131100  |
| C | 16.42280900 | 10.86641500 | -4.84208500  |
| C | 16.70778200 | 10.33091500 | -3.56191500  |
| C | 11.27026400 | 1.26662000  | -4.49335700  |
| C | 13.32694400 | -0.59138200 | -5.43246600  |
| C | 18.59354200 | 9.94806400  | -5.79695900  |
| C | 15.17916400 | 11.47957600 | -5.01734800  |
| C | 9.98718500  | 6.41131500  | -2.87832700  |
| C | 12.44317500 | 8.12286500  | -0.81517600  |
| C | 16.58032900 | 9.85287600  | -7.09958500  |
| C | 19.78318100 | 4.72187500  | -7.41288900  |
| C | 14.41585600 | 0.01478700  | -3.37960000  |
| C | 17.53740600 | 1.73597200  | -8.23553000  |
| C | 11.69620600 | 0.65080200  | -2.20933600  |
| C | 13.42591800 | 9.04755200  | -1.12013600  |
| C | 15.72221000 | 10.20463600 | -2.60014000  |
| C | 19.76338100 | 6.10897400  | -7.40800700  |
| C | 19.13210500 | 8.91144100  | -6.54281300  |
| C | 14.53566300 | -0.51925700 | -6.10420100  |
| C | 16.78519500 | 0.75142500  | -7.61302200  |
| C | 10.50815300 | 2.34315000  | -4.08123000  |
| C | 9.79434100  | 5.08060700  | -3.19943600  |
| O | 11.08153100 | 8.52771700  | -11.89230200 |
| O | 11.33541600 | 5.92300500  | -12.14414600 |
| O | 7.46291400  | 13.92308200 | -6.98687300  |
| O | 9.42405400  | 15.50392800 | -7.66925800  |
| O | 10.86842500 | 2.23062500  | 5.96838100   |

|   |             |             |              |
|---|-------------|-------------|--------------|
| O | 10.66424500 | -0.23577900 | 5.20566800   |
| O | 21.07852000 | 2.77230400  | 0.81299400   |
| O | 19.38096900 | 1.39036400  | 2.10115900   |
| H | 8.10678900  | 11.97263800 | -5.18082700  |
| H | 11.90531700 | 14.74868400 | -6.80240100  |
| H | 10.79475000 | 4.09541600  | 3.96130600   |
| H | 10.80533800 | -0.66477500 | 2.50309600   |
| H | 20.73919300 | 2.87819900  | -1.91566400  |
| H | 17.34535200 | 0.24893100  | 0.61631500   |
| H | 13.63521600 | 4.87463700  | -11.11455800 |
| H | 13.07238100 | 9.78958500  | -10.55879600 |
| H | 16.84298500 | 4.18356500  | -9.02746400  |
| H | 10.00428500 | 9.25069600  | -2.90362500  |
| H | 19.17664800 | 2.92301200  | -5.50577200  |
| H | 10.87495300 | 6.03940600  | 0.38685100   |
| H | 17.67459600 | 9.87800700  | -3.38113100  |
| H | 11.44708500 | 1.12944300  | -5.55263000  |
| H | 12.43162200 | -0.86600500 | -5.97968000  |
| H | 19.18232600 | 10.38881800 | -5.00004400  |
| H | 14.91830200 | 11.96926300 | -5.94772500  |
| H | 9.86977500  | 7.16048300  | -3.65104500  |
| H | 12.66560300 | 7.33193100  | -0.10966800  |
| H | 15.55714000 | 10.13780600 | -7.30640300  |
| H | 20.60856200 | 4.19843600  | -6.94340000  |
| H | 14.40446000 | 0.29587900  | -2.33435300  |
| H | 17.42955900 | 1.89534600  | -9.30258300  |
| H | 12.14790100 | 0.02651500  | -1.44789800  |
| H | 14.38102700 | 8.97289400  | -0.61680300  |
| H | 15.96065900 | 9.68485300  | -1.68162500  |
| H | 20.58116200 | 6.63744600  | -6.93450300  |
| H | 20.13045300 | 8.56582700  | -6.30612200  |
| H | 14.55504200 | -0.73662300 | -7.16467400  |
| H | 16.10524900 | 0.16061600  | -8.21368100  |
| H | 10.08352400 | 2.99303700  | -4.83494700  |
| H | 9.49725900  | 4.82889800  | -4.20906200  |
| C | 10.48379900 | -1.61278100 | 4.89383900   |
| C | 11.57533200 | -2.46415300 | 4.78083800   |
| C | 9.17707300  | -2.06689300 | 4.74269400   |
| C | 11.35992200 | -3.82629800 | 4.52284100   |
| H | 12.56825100 | -2.05989500 | 4.90807500   |
| C | 8.93379900  | -3.41949900 | 4.48238200   |
| H | 8.37290200  | -1.35342700 | 4.84378700   |
| C | 10.03992600 | -4.27499200 | 4.37549400   |
| H | 9.86807800  | -5.32487200 | 4.17241300   |
| C | 10.81962400 | 3.54973000  | 6.50053100   |
| C | 12.00101800 | 4.21510700  | 6.80459500   |

|   |             |             |            |
|---|-------------|-------------|------------|
| C | 9.57339300  | 4.11413400  | 6.75090700 |
| C | 11.94856700 | 5.48905000  | 7.38687000 |
| H | 12.94035800 | 3.72523100  | 6.59847000 |
| C | 9.49013900  | 5.38634300  | 7.32912200 |
| H | 8.69069200  | 3.54493200  | 6.50001000 |
| C | 10.68748500 | 6.05051100  | 7.63424500 |
| H | 10.63599100 | 7.03520300  | 8.08227000 |
| C | 8.13951500  | 6.06475100  | 7.63430600 |
| C | 13.21944500 | 6.27943600  | 7.75963300 |
| C | 14.51300100 | 5.50645500  | 7.41556400 |
| H | 14.56741400 | 4.55779600  | 7.96096600 |
| H | 14.58168300 | 5.30252000  | 6.34147800 |
| H | 15.37898100 | 6.11314200  | 7.70288400 |
| C | 13.23438100 | 7.62148100  | 6.97899400 |
| H | 13.24305800 | 7.43295500  | 5.90009700 |
| H | 12.35483400 | 8.22775700  | 7.21719100 |
| H | 14.13092700 | 8.19461200  | 7.24340200 |
| C | 13.21492800 | 6.56237200  | 9.28623700 |
| H | 12.33483200 | 7.14398000  | 9.57796300 |
| H | 13.20932900 | 5.62112700  | 9.84629300 |
| H | 14.11152200 | 7.13056600  | 9.56104400 |
| C | 8.04182700  | 6.34648700  | 9.15788100 |
| H | 8.85220100  | 7.00244500  | 9.49127000 |
| H | 7.08663000  | 6.83482100  | 9.38455200 |
| H | 8.10056000  | 5.40926500  | 9.72161900 |
| C | 8.04967000  | 7.40054800  | 6.84824000 |
| H | 8.86100000  | 8.07971500  | 7.12860500 |
| H | 8.11198100  | 7.21236600  | 5.77108800 |
| H | 7.09516900  | 7.89490300  | 7.06440500 |
| C | 6.93760600  | 5.18123300  | 7.22678400 |
| H | 6.94528400  | 4.97273700  | 6.15115500 |
| H | 6.93931000  | 4.23214100  | 7.77437600 |
| H | 6.00808100  | 5.71016200  | 7.46450900 |
| C | 7.50892100  | -3.98291900 | 4.31182000 |
| C | 7.25490500  | -5.06546200 | 5.39516100 |
| H | 7.34312900  | -4.62878300 | 6.39575400 |
| H | 6.24578800  | -5.47823000 | 5.27846100 |
| H | 7.97511700  | -5.88537600 | 5.31056500 |
| C | 6.42724700  | -2.88749800 | 4.45824400 |
| H | 5.43853000  | -3.34134000 | 4.32843600 |
| H | 6.46261400  | -2.42554000 | 5.45120100 |
| H | 6.54687200  | -2.10796500 | 3.69764200 |
| C | 7.37400000  | -4.61369700 | 2.89973200 |
| H | 6.36531000  | -5.02389400 | 2.77116900 |
| H | 7.54685900  | -3.85645200 | 2.12756600 |
| H | 8.09636200  | -5.42375000 | 2.75798100 |

|   |             |             |              |
|---|-------------|-------------|--------------|
| C | 12.51864200 | -4.83399800 | 4.39275900   |
| C | 12.50167000 | -5.45053000 | 2.96793200   |
| H | 11.55592700 | -5.96572400 | 2.77232700   |
| H | 12.63163100 | -4.66709500 | 2.21370800   |
| H | 13.31817700 | -6.17535900 | 2.86665900   |
| C | 13.89482800 | -4.17047000 | 4.61636000   |
| H | 14.08664800 | -3.38744200 | 3.87469700   |
| H | 13.96449500 | -3.73621900 | 5.62060500   |
| H | 14.67795700 | -4.92947000 | 4.51787100   |
| C | 12.34583900 | -5.95665900 | 5.45114100   |
| H | 12.35777100 | -5.53159500 | 6.46055300   |
| H | 11.40094600 | -6.49100900 | 5.31188200   |
| H | 13.16643500 | -6.67854700 | 5.36281200   |
| C | 6.31773800  | 13.18048200 | -6.57858700  |
| C | 5.94818600  | 12.04752300 | -7.29381500  |
| C | 5.58108400  | 13.64008400 | -5.49324500  |
| C | 4.79383900  | 11.34400600 | -6.92516800  |
| H | 6.55977800  | 11.73767400 | -8.12777000  |
| C | 4.42026500  | 12.95928500 | -5.10550300  |
| H | 5.91899300  | 14.52794400 | -4.97981600  |
| C | 4.05102500  | 11.81866200 | -5.83393600  |
| H | 3.15559100  | 11.28339300 | -5.54268900  |
| C | 10.42823700 | 16.42870400 | -8.07166000  |
| C | 10.66679100 | 17.52613600 | -7.25067600  |
| C | 11.11111700 | 16.24366900 | -9.26687300  |
| C | 11.60918800 | 18.48835600 | -7.63059200  |
| H | 10.10174700 | 17.61383400 | -6.33467300  |
| C | 12.06360500 | 17.18989700 | -9.67057000  |
| H | 10.88608300 | 15.37322500 | -9.86410300  |
| C | 12.29279600 | 18.29623200 | -8.84021800  |
| H | 13.02683300 | 19.03184100 | -9.14543900  |
| C | 12.85707900 | 17.04972600 | -10.98431300 |
| C | 14.37560400 | 16.99891000 | -10.66503800 |
| H | 14.94741600 | 16.90360000 | -11.59573600 |
| H | 14.70250300 | 17.90838200 | -10.15137500 |
| H | 14.60059600 | 16.13934900 | -10.02476500 |
| C | 12.55422000 | 18.26864900 | -11.89686800 |
| H | 13.12016200 | 18.18263300 | -12.83212900 |
| H | 11.48561100 | 18.30875100 | -12.13400000 |
| H | 12.83543000 | 19.20680000 | -11.40825100 |
| C | 12.48362700 | 15.76384000 | -11.75373400 |
| H | 12.70275400 | 14.86602700 | -11.16520800 |
| H | 11.42218100 | 15.75711200 | -12.02583700 |
| H | 13.07092200 | 15.71667000 | -12.67721300 |
| C | 11.91205900 | 19.73018600 | -6.76852300  |
| C | 11.06606100 | 19.76233900 | -5.47440800  |

|   |             |             |              |
|---|-------------|-------------|--------------|
| H | 9.99466400  | 19.79492700 | -5.70171400  |
| H | 11.27086400 | 18.88912800 | -4.84509500  |
| H | 11.32078500 | 20.66160900 | -4.90276400  |
| C | 11.59622400 | 21.01017600 | -7.58827400  |
| H | 12.19950700 | 21.05370100 | -8.50058100  |
| H | 10.53829700 | 21.02793000 | -7.87134900  |
| H | 11.81500900 | 21.90017000 | -6.98632200  |
| C | 13.41208200 | 19.72178100 | -6.36841500  |
| H | 13.64435200 | 18.82445800 | -5.78497900  |
| H | 14.05723700 | 19.73635200 | -7.25253200  |
| H | 13.63907600 | 20.60561500 | -5.76050100  |
| C | 3.55326500  | 13.42253800 | -3.91753600  |
| C | 4.32317200  | 10.08328500 | -7.67844400  |
| C | 5.29242700  | 9.68492000  | -8.81561200  |
| H | 5.37107500  | 10.47609600 | -9.56907800  |
| H | 6.29210100  | 9.46542700  | -8.42375900  |
| H | 4.91380300  | 8.78276400  | -9.30863700  |
| C | 4.23053500  | 8.89383700  | -6.68496400  |
| H | 3.52227900  | 9.10482700  | -5.87772700  |
| H | 3.89219000  | 7.99509700  | -7.21399400  |
| H | 5.21141400  | 8.69229800  | -6.24126000  |
| C | 2.92671900  | 10.35531400 | -8.29993300  |
| H | 2.98314000  | 11.18803600 | -9.00918500  |
| H | 2.57547200  | 9.46287500  | -8.83144800  |
| H | 2.19437000  | 10.60840000 | -7.52668700  |
| C | 4.11996700  | 14.69303900 | -3.24209000  |
| H | 4.15934800  | 15.53218800 | -3.94558800  |
| H | 3.46718400  | 14.97675700 | -2.40920300  |
| H | 5.12445600  | 14.51518400 | -2.84221900  |
| C | 2.12018500  | 13.73917000 | -4.42367800  |
| H | 1.49332000  | 14.06366300 | -3.58461600  |
| H | 2.15003800  | 14.53937500 | -5.17095800  |
| H | 1.65803300  | 12.85746900 | -4.87878000  |
| C | 11.22133000 | 4.51140600  | -12.12223800 |
| C | 11.27564600 | 3.85050600  | -13.34361100 |
| C | 11.00094500 | 3.83241200  | -10.92741900 |
| C | 11.10014200 | 2.46179600  | -13.38948500 |
| H | 11.43974900 | 4.44036300  | -14.23368300 |
| C | 10.82758600 | 2.44340700  | -10.94387100 |
| H | 10.96139100 | 4.39378500  | -10.00575100 |
| C | 10.88467300 | 1.78290100  | -12.18083200 |
| H | 10.75338000 | 0.70799200  | -12.20371400 |
| C | 10.98128200 | 9.88307000  | -12.27113600 |
| C | 9.90096800  | 10.59609200 | -11.76648600 |
| C | 11.86795700 | 10.44612000 | -13.18239500 |
| C | 9.69377300  | 11.92244700 | -12.16776100 |

|   |             |             |              |
|---|-------------|-------------|--------------|
| H | 9.23382100  | 10.08680300 | -11.08071300 |
| C | 11.65956700 | 11.75445600 | -13.63504900 |
| H | 12.69823000 | 9.85439900  | -13.54381300 |
| C | 10.57595300 | 12.47668500 | -13.10918000 |
| H | 10.41343000 | 13.48936500 | -13.44266300 |
| C | 11.14247000 | 1.67240600  | -14.71349900 |
| C | 12.29101700 | 0.62982500  | -14.65170400 |
| H | 12.32396300 | 0.05744300  | -15.58633400 |
| H | 13.25375000 | 1.13364600  | -14.51380800 |
| H | 12.14464300 | -0.07044500 | -13.82326200 |
| C | 11.38752200 | 2.59131000  | -15.93296600 |
| H | 12.34878700 | 3.11076700  | -15.85145200 |
| H | 11.40585900 | 1.98121400  | -16.84282300 |
| H | 10.58884000 | 3.33418200  | -16.03621400 |
| C | 9.78628000  | 0.94502900  | -14.91828700 |
| H | 8.96936400  | 1.67292600  | -14.96699200 |
| H | 9.80765800  | 0.37599600  | -15.85533800 |
| H | 9.58243500  | 0.25048800  | -14.09722800 |
| C | 10.58397400 | 1.63382500  | -9.65327900  |
| C | 11.75749400 | 0.63712100  | -9.45114400  |
| H | 11.59442700 | 0.05050200  | -8.53840300  |
| H | 11.83727400 | -0.05346000 | -10.29674600 |
| H | 12.70344900 | 1.18077200  | -9.35412100  |
| C | 10.49845200 | 2.54087300  | -8.40339500  |
| H | 11.43331300 | 3.08911500  | -8.24330900  |
| H | 9.67341300  | 3.25674300  | -8.49017000  |
| H | 10.31582800 | 1.91534800  | -7.52211000  |
| C | 9.24851900  | 0.85253300  | -9.77678800  |
| H | 8.41442100  | 1.54784500  | -9.91921500  |
| H | 9.27069000  | 0.16051800  | -10.62432200 |
| H | 9.07152800  | 0.27282500  | -8.86306200  |
| C | 8.55416900  | 12.73645800 | -11.51991600 |
| C | 7.19987400  | 12.00765000 | -11.72095500 |
| H | 6.39859800  | 12.57965200 | -11.23775600 |
| H | 6.97112800  | 11.91315100 | -12.78810300 |
| H | 7.21936000  | 11.00526000 | -11.28147500 |
| C | 8.42918300  | 14.15720900 | -12.11717100 |
| H | 9.34340200  | 14.73892800 | -11.95658300 |
| H | 8.21615600  | 14.11928000 | -13.19159800 |
| H | 7.60649600  | 14.68167800 | -11.61941100 |
| C | 8.86638500  | 12.86515600 | -10.00405000 |
| H | 9.84776900  | 13.33011400 | -9.86439600  |
| H | 8.12399400  | 13.48184800 | -9.48548700  |
| H | 8.89548900  | 11.87760300 | -9.53049700  |
| C | 12.62298500 | 12.34608600 | -14.68551000 |
| C | 12.15683000 | 13.72818000 | -15.19949500 |

|   |             |             |              |
|---|-------------|-------------|--------------|
| H | 11.15972400 | 13.66531300 | -15.64945100 |
| H | 12.13786500 | 14.46893900 | -14.39417100 |
| H | 12.85784700 | 14.07866300 | -15.96539000 |
| C | 14.02901100 | 12.50319300 | -14.04625500 |
| H | 14.40907200 | 11.53840900 | -13.69498100 |
| H | 14.73312500 | 12.90626400 | -14.78419700 |
| H | 13.98306900 | 13.18774100 | -13.19253800 |
| C | 12.71127800 | 11.39137000 | -15.90713000 |
| H | 13.38980000 | 11.81503500 | -16.65695700 |
| H | 13.09249800 | 10.40710500 | -15.61912200 |
| H | 11.72254600 | 11.26157300 | -16.36007600 |
| C | 22.11853200 | 3.53596600  | 0.21336600   |
| C | 23.11923100 | 2.81218400  | -0.44505700  |
| C | 22.15088900 | 4.93120300  | 0.32829500   |
| C | 24.21690500 | 3.44345800  | -1.02632600  |
| H | 23.01333900 | 1.73716000  | -0.47533400  |
| C | 23.27716700 | 5.55088200  | -0.25290800  |
| C | 24.27217800 | 4.84329500  | -0.91365500  |
| H | 23.37490200 | 6.62665400  | -0.18067800  |
| H | 25.10602100 | 5.38802500  | -1.34074400  |
| C | 18.53795100 | 0.68489700  | 2.99937900   |
| C | 18.92821600 | -0.58783100 | 3.39704700   |
| C | 17.41621800 | 1.31055400  | 3.53010500   |
| C | 18.19416800 | -1.26149600 | 4.37979700   |
| H | 19.81659200 | -1.01401800 | 2.95581800   |
| C | 16.65933700 | 0.65792800  | 4.51361600   |
| H | 17.16696300 | 2.30450600  | 3.18945500   |
| C | 17.06877600 | -0.62085800 | 4.92063100   |
| H | 16.50156400 | -1.12843300 | 5.69090700   |
| C | 25.33367500 | 2.67519800  | -1.75554900  |
| C | 25.40938500 | 3.16330200  | -3.22739800  |
| H | 25.61673300 | 4.23709300  | -3.27650700  |
| H | 26.21050000 | 2.63185400  | -3.75466100  |
| H | 24.46158800 | 2.96870500  | -3.74077400  |
| C | 25.08422500 | 1.14932600  | -1.76114500  |
| H | 25.04736200 | 0.75038700  | -0.74124000  |
| H | 24.14830700 | 0.90234000  | -2.27459700  |
| H | 25.90488700 | 0.65375000  | -2.29149000  |
| C | 26.68730800 | 2.94694200  | -1.04562500  |
| H | 26.64662500 | 2.60225800  | -0.00681100  |
| H | 27.49243500 | 2.41207200  | -1.56331000  |
| H | 26.92611400 | 4.01523700  | -1.04696900  |
| C | 18.61998200 | -2.64813400 | 4.90422600   |
| C | 19.88583200 | -3.17986100 | 4.19230500   |
| H | 19.71832400 | -3.28998300 | 3.11507700   |
| H | 20.74163500 | -2.51523300 | 4.35427300   |

|   |             |             |             |
|---|-------------|-------------|-------------|
| H | 20.13772800 | -4.16485700 | 4.60069100  |
| C | 18.92578800 | -2.54286400 | 6.42297200  |
| H | 18.04546700 | -2.20742300 | 6.98030300  |
| H | 19.22767400 | -3.52339000 | 6.81013400  |
| H | 19.73858300 | -1.82979300 | 6.59737000  |
| C | 17.47159200 | -3.66293100 | 4.67309400  |
| H | 16.55952600 | -3.34884100 | 5.18800400  |
| H | 17.25157300 | -3.75116500 | 3.60369300  |
| H | 17.76317200 | -4.64840800 | 5.05605400  |
| C | 15.43731700 | 1.32821100  | 5.17690500  |
| C | 15.02932900 | 2.62746900  | 4.44362700  |
| H | 14.80297000 | 2.43074800  | 3.39009200  |
| H | 14.12789400 | 3.03617300  | 4.90950600  |
| H | 15.81721200 | 3.38659500  | 4.50524700  |
| C | 14.21761200 | 0.36867500  | 5.16701000  |
| H | 13.35545700 | 0.84112500  | 5.65203600  |
| H | 13.94112600 | 0.11849800  | 4.13711900  |
| H | 14.43990000 | -0.55883700 | 5.70510700  |
| C | 15.80803700 | 1.67677100  | 6.64404200  |
| H | 16.07154800 | 0.77296100  | 7.20327800  |
| H | 16.66276500 | 2.36138700  | 6.66815200  |
| H | 14.95654500 | 2.15679800  | 7.14132900  |
| C | 21.14161600 | 5.81916200  | 1.09503400  |
| C | 20.75265500 | 7.04589100  | 0.22263800  |
| H | 20.03267500 | 7.66240700  | 0.77309000  |
| H | 21.61621000 | 7.67233300  | -0.01893300 |
| H | 20.28679100 | 6.71454400  | -0.71160800 |
| C | 21.84780000 | 6.31230200  | 2.38878300  |
| H | 22.10667900 | 5.45981400  | 3.02544000  |
| H | 22.76544200 | 6.85912800  | 2.14638400  |
| H | 21.17848900 | 6.97839900  | 2.94657100  |
| C | 19.81878300 | 5.11791100  | 1.49853600  |
| H | 19.26900700 | 4.78664300  | 0.61128600  |
| H | 19.98917100 | 4.25477000  | 2.14140200  |
| H | 19.19863600 | 5.84962200  | 2.02990200  |
| C | 3.49526600  | 12.29198000 | -2.85513200 |
| H | 3.06583000  | 11.37677900 | -3.27471900 |
| H | 4.50144200  | 12.06513400 | -2.48671600 |
| H | 2.87388300  | 12.60895600 | -2.00918300 |

D 6 92 208 210 F

D 6 92 208 5 F

D 1 91 199 200 F

D 1 91 199 2 F

D 18 96 347 349 F

D 18 96 347 17 F



D 13 95 399 341 F  
 D 13 95 399 14 F  
 D 19 90 269 270 F  
 D 19 90 269 20 F  
 D 24 89 278 280 F  
 D 24 89 278 23 F  
 D 7 93 138 140 F  
 D 7 93 138 8 F  
 D 12 94 129 130 F  
 D 12 94 129 11 F

1'' (partial cone, R=3,5-di-*tert*-butylphenyl)

Zero-point correction= 3.478991 (Hartree/Particle)  
 Thermal correction to Energy= 3.670818  
 Thermal correction to Enthalpy= 3.671762  
 Thermal correction to Gibbs Free Energy= 3.223297  
 Sum of electronic and zero-point Energies= -8427.054259  
 Sum of electronic and thermal Energies= -8426.862432  
 Sum of electronic and thermal Enthalpies= -8426.861487  
 Sum of electronic and thermal Free Energies= -8427.309952

|   |             |             |              |
|---|-------------|-------------|--------------|
| C | 5.06556900  | 8.31401200  | -9.35038200  |
| C | 5.39289700  | 8.37837000  | -8.02259700  |
| C | 6.65657200  | 8.87728700  | -7.61602300  |
| C | 7.59061300  | 9.31059300  | -8.61043500  |
| C | 7.23162300  | 9.23123400  | -9.98008300  |
| C | 6.00459300  | 8.74970100  | -10.35005000 |
| C | 13.81841500 | 4.96229500  | 2.93475300   |
| C | 12.76670200 | 5.54313700  | 2.28484400   |
| C | 11.91796200 | 4.76493300  | 1.46036200   |
| C | 12.17144200 | 3.36389500  | 1.30261000   |
| C | 13.26275400 | 2.77719100  | 2.00341300   |
| C | 14.07353100 | 3.55116900  | 2.79257400   |
| C | 17.91979700 | -2.22626800 | -2.59113300  |
| C | 17.58564200 | -1.34428100 | -3.58344000  |
| C | 16.22830700 | -1.17114900 | -3.95579200  |
| C | 15.21837100 | -1.87135700 | -3.22473900  |
| C | 15.59499400 | -2.82880400 | -2.25071800  |
| C | 16.91175000 | -3.02764800 | -1.94752400  |
| C | 19.97438700 | 8.24951900  | -3.32911500  |
| C | 19.10193600 | 8.81616900  | -4.21584100  |

|   |             |             |             |
|---|-------------|-------------|-------------|
| C | 18.32022900 | 7.99861800  | -5.06573600 |
| C | 18.48947800 | 6.58059500  | -5.04632700 |
| C | 19.39105400 | 6.01489100  | -4.10223900 |
| C | 20.09596000 | 6.81354400  | -3.25061200 |
| N | 17.82111800 | 5.78634500  | -5.93334800 |
| N | 6.97763100  | 8.93296200  | -6.29502000 |
| N | 8.81335600  | 9.78590600  | -8.24937200 |
| N | 10.86341400 | 5.35634900  | 0.83889000  |
| N | 11.36907200 | 2.60743800  | 0.49926600  |
| N | 15.89200200 | -0.35791000 | -4.99613000 |
| N | 13.90081100 | -1.63414800 | -3.46690400 |
| N | 17.41857100 | 8.57651400  | -5.91016100 |
| C | 16.78175900 | 7.78965200  | -6.77795300 |
| C | 17.01422300 | 6.37597300  | -6.82304500 |
| C | 16.33524800 | 5.58265000  | -7.84867400 |
| C | 15.72487100 | 6.24902000  | -8.94610600 |
| C | 8.17205400  | 9.43173100  | -5.95308600 |
| C | 9.10249600  | 9.86547800  | -6.94466700 |
| C | 10.42380100 | 10.32979200 | -6.52995200 |
| C | 10.68531700 | 10.60990700 | -5.16548600 |
| C | 10.05220600 | 4.59020600  | 0.10322600  |
| C | 10.31509300 | 3.19857500  | -0.08065000 |
| C | 9.44888400  | 2.43630100  | -0.98140400 |
| C | 8.18273600  | 2.96141100  | -1.35183400 |
| C | 14.59543300 | -0.21867000 | -5.29641500 |
| C | 13.58460600 | -0.81892200 | -4.47637700 |
| C | 12.18384800 | -0.47479500 | -4.70209200 |
| C | 11.80717400 | 0.05199000  | -5.95950800 |
| C | 15.75879200 | 8.36600800  | -7.64464400 |
| C | 15.03775700 | 9.48145600  | -7.19713300 |
| C | 15.36354300 | 7.66914000  | -8.80850000 |
| C | 13.89664300 | 9.92410400  | -7.87128200 |
| C | 9.98923000  | 0.02797400  | -3.77342200 |
| C | 8.56408600  | 9.45557600  | -4.54611100 |
| C | 7.87747500  | 8.63395700  | -3.64064300 |
| C | 9.73101600  | 10.15221100 | -4.14211900 |
| C | 8.31536300  | 8.46681400  | -2.32609100 |
| C | 15.44940700 | 3.44219900  | -8.61817000 |
| C | 14.19922100 | 0.56385200  | -6.46749400 |
| C | 15.12599000 | 1.39504700  | -7.12314300 |
| C | 12.84363400 | 0.52504500  | -6.88810200 |
| C | 14.73728400 | 2.19782800  | -8.20025900 |
| C | 9.23747200  | 0.66575300  | -2.64901400 |
| C | 8.91823200  | 5.20739500  | -0.57835200 |
| C | 8.93310900  | 6.59060000  | -0.80962200 |
| C | 7.90947300  | 4.39390800  | -1.14806000 |

|   |             |             |              |
|---|-------------|-------------|--------------|
| C | 7.96600700  | 7.20633600  | -1.60560900  |
| C | 12.79057300 | 10.56275100 | -7.09234500  |
| C | 12.99947000 | 11.07642700 | -5.78746000  |
| C | 7.87397900  | 1.02201500  | -2.79362800  |
| C | 9.56106500  | 0.34613200  | -5.08623300  |
| C | 15.12268700 | 4.07213600  | -9.84528500  |
| C | 11.46878600 | 10.31230600 | -7.46493700  |
| C | 6.84040600  | 6.42699100  | -1.97113000  |
| C | 9.34677500  | 9.32726600  | -1.87603700  |
| C | 16.17361900 | 4.19627300  | -7.68921600  |
| C | 13.67334800 | 9.38821300  | -9.16496400  |
| C | 11.27433500 | -0.50194600 | -3.63056800  |
| C | 13.43608900 | 1.99752700  | -8.72375300  |
| C | 9.95846600  | 1.30289700  | -1.63520000  |
| C | 10.03184000 | 10.14552600 | -2.76029600  |
| C | 11.97608300 | 11.09696400 | -4.85378100  |
| C | 14.38763400 | 8.29150000  | -9.62046700  |
| C | 15.24310300 | 5.44211500  | -9.99797200  |
| C | 10.44127500 | 0.34455400  | -6.15214200  |
| C | 12.52078600 | 1.17928400  | -8.09197700  |
| C | 7.36315200  | 2.14373500  | -2.16265700  |
| C | 6.81497000  | 5.05986900  | -1.74718300  |
| O | 20.96880600 | 6.33585900  | -2.25824000  |
| O | 20.86271800 | 8.92320100  | -2.49340500  |
| O | 3.85783000  | 7.84765400  | -9.85335400  |
| O | 5.55315000  | 8.63529000  | -11.65866100 |
| O | 14.68405200 | 5.62217900  | 3.79799500   |
| O | 15.12413000 | 3.11612300  | 3.58001300   |
| O | 19.20992100 | -2.43037700 | -2.10907400  |
| O | 17.42485300 | -3.99763400 | -1.08502200  |
| H | 4.69964000  | 8.05551000  | -7.26001800  |
| H | 7.94718100  | 9.56282300  | -10.71793600 |
| H | 12.54929500 | 6.59510500  | 2.39460400   |
| H | 13.43096100 | 1.71440400  | 1.89981500   |
| H | 18.34160200 | -0.77518900 | -4.10419100  |
| H | 14.81355600 | -3.39657300 | -1.76756100  |
| H | 18.98340700 | 9.88678100  | -4.29297900  |
| H | 19.50668200 | 4.93993100  | -4.07523400  |
| H | 15.30464800 | 9.87125000  | -6.22449700  |
| H | 7.08159700  | 8.02656700  | -4.04938400  |
| H | 16.12712500 | 1.44166900  | -6.71228400  |
| H | 9.80648300  | 7.12841900  | -0.46662200  |
| H | 13.99360200 | 11.37903700 | -5.48053000  |
| H | 7.24545100  | 0.46980500  | -3.48328900  |
| H | 14.69018600 | 3.48788300  | -10.64888500 |
| H | 11.21764700 | 9.95035000  | -8.45226600  |

|   |             |             |              |
|---|-------------|-------------|--------------|
| H | 6.02006000  | 6.88886000  | -2.50809800  |
| H | 9.66104200  | 9.29123000  | -0.83946500  |
| H | 16.51300000 | 3.76048400  | -6.75807800  |
| H | 12.86231500 | 9.77177300  | -9.77230600  |
| H | 11.64708400 | -0.82789400 | -2.66727800  |
| H | 13.10703200 | 2.58391500  | -9.57121200  |
| H | 10.99307900 | 1.04910200  | -1.44422500  |
| H | 10.86867600 | 10.72382500 | -2.38944000  |
| H | 12.20240700 | 11.41259300 | -3.84309100  |
| H | 14.10615400 | 7.84492700  | -10.56575700 |
| H | 14.88612700 | 5.90304300  | -10.91074600 |
| H | 10.09074000 | 0.70135000  | -7.11144900  |
| H | 11.51481700 | 1.12311700  | -8.48670200  |
| H | 6.34662500  | 2.44706200  | -2.37983100  |
| H | 5.97584700  | 4.48790100  | -2.12275200  |
| C | 15.52842900 | 1.76296800  | 3.68922900   |
| C | 16.47938100 | 1.23266800  | 2.82524400   |
| C | 15.05618200 | 1.04678100  | 4.78313700   |
| C | 17.00201500 | -0.04686300 | 3.07224400   |
| H | 16.83060200 | 1.83478500  | 1.99780700   |
| C | 15.56369700 | -0.22661700 | 5.06033000   |
| H | 14.33143100 | 1.52150600  | 5.43057000   |
| C | 16.53131200 | -0.75456400 | 4.19067100   |
| H | 16.94275100 | -1.72904800 | 4.40112500   |
| C | 14.48464200 | 7.00677400  | 4.04252800   |
| C | 15.12778900 | 7.93650000  | 3.24355300   |
| C | 13.65940800 | 7.39051500  | 5.09855700   |
| C | 14.96748300 | 9.30813400  | 3.50242000   |
| H | 15.75267800 | 7.58267500  | 2.43456500   |
| C | 13.48595800 | 8.74679400  | 5.38273900   |
| H | 13.18256700 | 6.61933600  | 5.68509000   |
| C | 14.14821400 | 9.68685800  | 4.57020200   |
| H | 14.01544700 | 10.73818900 | 4.78325700   |
| C | 12.59874700 | 9.23705400  | 6.54438100   |
| C | 15.67838600 | 10.32778200 | 2.59239100   |
| C | 17.20883400 | 10.07166800 | 2.63275100   |
| H | 17.59018700 | 10.20580400 | 3.65071300   |
| H | 17.45028600 | 9.05640100  | 2.30361000   |
| H | 17.72045400 | 10.77824100 | 1.96934200   |
| C | 15.15286300 | 10.15131500 | 1.14155700   |
| H | 15.34882600 | 9.14014500  | 0.77140400   |
| H | 14.07233100 | 10.32856500 | 1.10751900   |
| H | 15.64842700 | 10.86591600 | 0.47526200   |
| C | 15.41904200 | 11.78832200 | 3.02873500   |
| H | 14.35162800 | 12.03218900 | 2.98571900   |
| H | 15.78594400 | 11.96930900 | 4.04526000   |

|   |             |             |             |
|---|-------------|-------------|-------------|
| H | 15.94992500 | 12.46372500 | 2.34868500  |
| C | 13.46485300 | 10.05911200 | 7.53666400  |
| H | 13.91546700 | 10.92615600 | 7.04341000  |
| H | 12.84174200 | 10.41753100 | 8.36470400  |
| H | 14.26812100 | 9.43620700  | 7.94457200  |
| C | 11.46130800 | 10.12998700 | 5.97929800  |
| H | 11.86619500 | 10.99879600 | 5.45073400  |
| H | 10.84067800 | 9.55754500  | 5.28160700  |
| H | 10.82877800 | 10.48882500 | 6.79991500  |
| C | 11.95362100 | 8.06548900  | 7.32060200  |
| H | 11.30848000 | 7.46574000  | 6.66899800  |
| H | 12.71667100 | 7.41551700  | 7.76316300  |
| H | 11.33762900 | 8.46952400  | 8.13158600  |
| C | 15.06599400 | -0.97610000 | 6.31371300  |
| C | 15.26847000 | -0.07995900 | 7.56609800  |
| H | 14.70584300 | 0.85479000  | 7.48388700  |
| H | 14.92121400 | -0.61216100 | 8.45963900  |
| H | 16.32890400 | 0.16371600  | 7.69103300  |
| C | 13.55673000 | -1.29777300 | 6.14517300  |
| H | 13.18129500 | -1.81055100 | 7.03900800  |
| H | 12.97507700 | -0.38182500 | 5.99935200  |
| H | 13.40207200 | -1.94632200 | 5.27646300  |
| C | 15.82873800 | -2.29952000 | 6.55097200  |
| H | 15.44886300 | -2.77141000 | 7.46419900  |
| H | 15.68341900 | -2.99929200 | 5.72246300  |
| H | 16.90176100 | -2.11878600 | 6.67995900  |
| C | 18.08835600 | -0.62034500 | 2.13617600  |
| C | 18.59408900 | -2.00599500 | 2.60259800  |
| H | 19.04081000 | -1.95110000 | 3.60175100  |
| H | 17.78520600 | -2.74483000 | 2.61603100  |
| H | 19.35674700 | -2.36080500 | 1.90141200  |
| C | 17.50924600 | -0.77045100 | 0.70452600  |
| H | 16.60965400 | -1.39455500 | 0.72221000  |
| H | 17.23710500 | 0.20392900  | 0.28509200  |
| H | 18.24320700 | -1.24859500 | 0.04556700  |
| C | 19.30357600 | 0.34592400  | 2.10335000  |
| H | 19.01057300 | 1.33899400  | 1.74871900  |
| H | 19.73741100 | 0.44879700  | 3.10389300  |
| H | 20.07038000 | -0.04906300 | 1.42565000  |
| C | 2.86064600  | 7.39383400  | -8.94792100 |
| C | 2.84691800  | 6.05492000  | -8.57469500 |
| C | 1.90791300  | 8.29614700  | -8.48993600 |
| C | 1.83844200  | 5.58409900  | -7.72433600 |
| H | 3.61318300  | 5.40181200  | -8.96515300 |
| C | 0.88808800  | 7.85323200  | -7.63805500 |
| H | 1.97070800  | 9.32349400  | -8.81652100 |

|   |             |             |              |
|---|-------------|-------------|--------------|
| C | 0.87693100  | 6.49936400  | -7.27044900  |
| H | 0.09287100  | 6.14593400  | -6.61196500  |
| C | 6.40466100  | 9.04015100  | -12.72203600 |
| C | 6.32589500  | 10.34804400 | -13.18573000 |
| C | 7.26553600  | 8.10784400  | -13.28944800 |
| C | 7.12117500  | 10.74830800 | -14.26697600 |
| H | 5.63670300  | 11.02579300 | -12.70439200 |
| C | 8.07201800  | 8.48014500  | -14.37240300 |
| H | 7.28015500  | 7.10597400  | -12.88675800 |
| C | 7.98311100  | 9.80036800  | -14.83856600 |
| H | 8.60261200  | 10.09911700 | -15.67535700 |
| C | 9.03877700  | 7.49168100  | -15.05544400 |
| C | 10.48850000 | 8.03652700  | -14.94819900 |
| H | 11.18297400 | 7.34410400  | -15.43870300 |
| H | 10.57964500 | 9.01518600  | -15.42972000 |
| H | 10.77782700 | 8.13975600  | -13.89676600 |
| C | 8.64548500  | 7.34280900  | -16.54990800 |
| H | 9.33088400  | 6.64617300  | -17.04718400 |
| H | 7.62499700  | 6.95465200  | -16.63627500 |
| H | 8.69467700  | 8.30516200  | -17.06902600 |
| C | 8.99874900  | 6.09042000  | -14.40255300 |
| H | 9.29337600  | 6.13551800  | -13.34810900 |
| H | 7.99897300  | 5.64802900  | -14.47456100 |
| H | 9.70117600  | 5.43185300  | -14.92536700 |
| C | 7.07437600  | 12.18082300 | -14.83590500 |
| C | 6.07046400  | 13.07834600 | -14.07559300 |
| H | 5.05133800  | 12.68226700 | -14.14687300 |
| H | 6.34367000  | 13.17225000 | -13.01868200 |
| H | 6.07858100  | 14.07985300 | -14.51970900 |
| C | 6.64393700  | 12.12444100 | -16.32648200 |
| H | 7.34650600  | 11.52932500 | -16.91838300 |
| H | 5.64858300  | 11.67649400 | -16.41709200 |
| H | 6.61339400  | 13.13834400 | -16.74283900 |
| C | 8.48316300  | 12.82314500 | -14.72218800 |
| H | 8.79388000  | 12.87373700 | -13.67312900 |
| H | 9.22788700  | 12.24332100 | -15.27655700 |
| H | 8.46182000  | 13.83980500 | -15.13221600 |
| C | -0.20448900 | 8.80048800  | -7.10227500  |
| C | 1.75887100  | 4.10898100  | -7.28177900  |
| C | 2.90008000  | 3.25656600  | -7.88380100  |
| H | 2.85899000  | 3.25598500  | -8.97870100  |
| H | 3.88135400  | 3.62481100  | -7.56418300  |
| H | 2.79461100  | 2.22218300  | -7.53829600  |
| C | 1.85962100  | 4.03282100  | -5.73445100  |
| H | 1.04896900  | 4.59263000  | -5.25753800  |
| H | 1.79595800  | 2.98768700  | -5.40890600  |

|   |             |             |             |
|---|-------------|-------------|-------------|
| H | 2.81431400  | 4.44977700  | -5.39595700 |
| C | 0.40557600  | 3.50781600  | -7.74795000 |
| H | 0.32653200  | 3.55349400  | -8.83937100 |
| H | 0.33615800  | 2.45980500  | -7.43304100 |
| H | -0.43895000 | 4.05445600  | -7.31671700 |
| C | -0.02477700 | 10.24813400 | -7.61538900 |
| H | -0.08320900 | 10.29131800 | -8.70867700 |
| H | -0.82505800 | 10.87456500 | -7.20619400 |
| H | 0.93470300  | 10.66729300 | -7.29254200 |
| C | -1.59545700 | 8.28973700  | -7.56558500 |
| H | -2.38062400 | 8.95355200  | -7.18459300 |
| H | -1.64837900 | 8.27342800  | -8.65945100 |
| H | -1.78878700 | 7.27824900  | -7.19457900 |
| C | 20.86583800 | 10.35040600 | -2.54562200 |
| C | 21.92193200 | 10.97327700 | -3.19871300 |
| C | 19.83424600 | 11.07693000 | -1.95853400 |
| C | 21.97583100 | 12.37136800 | -3.26014500 |
| H | 22.68442600 | 10.35617000 | -3.64518200 |
| C | 19.85093200 | 12.47690300 | -2.02597800 |
| H | 19.03628500 | 10.54396500 | -1.46242100 |
| C | 20.92889000 | 13.09636600 | -2.67484100 |
| H | 20.95231700 | 14.17788700 | -2.72625400 |
| C | 22.34825500 | 6.26826200  | -2.56516400 |
| C | 23.15898100 | 5.78292400  | -1.53587200 |
| C | 22.88166200 | 6.61379700  | -3.79664600 |
| C | 24.53818900 | 5.68772900  | -1.71872500 |
| H | 22.68044500 | 5.52595400  | -0.60284700 |
| C | 24.26558100 | 6.50295400  | -4.01683800 |
| H | 22.22465700 | 6.95894700  | -4.58274100 |
| C | 25.07406100 | 6.05162100  | -2.97053900 |
| H | 26.14160100 | 5.98068700  | -3.11989500 |
| C | 23.13057000 | 13.12277500 | -3.95261600 |
| C | 22.56097200 | 13.97693900 | -5.11715300 |
| H | 23.37449300 | 14.52221600 | -5.61017600 |
| H | 22.07071400 | 13.33347100 | -5.85553500 |
| H | 21.82939300 | 14.70482100 | -4.75234700 |
| C | 24.19093200 | 12.15857300 | -4.53239600 |
| H | 23.75719200 | 11.50072500 | -5.29340200 |
| H | 24.98795000 | 12.74476600 | -5.00311700 |
| H | 24.63918300 | 11.54287800 | -3.74447200 |
| C | 23.82914400 | 14.04694600 | -2.91895500 |
| H | 24.23837100 | 13.45288000 | -2.09482500 |
| H | 24.64919300 | 14.59111500 | -3.40234000 |
| H | 23.12761900 | 14.77761900 | -2.50418200 |
| C | 18.73619100 | 13.34842800 | -1.41358600 |
| C | 18.08545500 | 14.20737400 | -2.53128800 |

|   |             |             |             |
|---|-------------|-------------|-------------|
| H | 17.29403000 | 14.83460100 | -2.10412300 |
| H | 18.82273300 | 14.86044300 | -3.00839200 |
| H | 17.64673800 | 13.56175400 | -3.29967700 |
| C | 17.62881400 | 12.49773000 | -0.75359900 |
| H | 17.14942400 | 11.83438500 | -1.48238000 |
| H | 18.03015500 | 11.89301100 | 0.06657500  |
| H | 16.86286000 | 13.16428500 | -0.34097800 |
| C | 19.34751700 | 14.27603800 | -0.32925700 |
| H | 19.80479700 | 13.67877600 | 0.46686600  |
| H | 20.11507500 | 14.92946300 | -0.75557400 |
| H | 18.56257100 | 14.90476100 | 0.10775300  |
| C | 25.48418400 | 5.26012400  | -0.57765100 |
| C | 24.71118300 | 4.73474600  | 0.65464400  |
| H | 25.42726400 | 4.41432600  | 1.41956400  |
| H | 24.07571900 | 5.51366100  | 1.08938100  |
| H | 24.08553000 | 3.87583400  | 0.38752300  |
| C | 26.31493100 | 6.49982900  | -0.14537900 |
| H | 26.90309400 | 6.88454200  | -0.98491400 |
| H | 25.64982800 | 7.29617100  | 0.20522800  |
| H | 26.99991800 | 6.22737300  | 0.66676400  |
| C | 26.44293600 | 4.13966900  | -1.05778800 |
| H | 27.05180000 | 4.46663200  | -1.90602800 |
| H | 27.11703100 | 3.85623100  | -0.24085900 |
| H | 25.87327600 | 3.25606300  | -1.36097400 |
| C | 24.83104600 | 6.87365100  | -5.40334400 |
| C | 26.36767100 | 6.71557300  | -5.47352400 |
| H | 26.86694900 | 7.36957500  | -4.74986600 |
| H | 26.66805400 | 5.67918000  | -5.28391900 |
| H | 26.71025200 | 6.99180800  | -6.47700500 |
| C | 24.19746800 | 5.94444500  | -6.47393100 |
| H | 23.10835600 | 6.05014000  | -6.49304900 |
| H | 24.58784700 | 6.19850200  | -7.46671500 |
| H | 24.43922900 | 4.89837100  | -6.25707100 |
| C | 24.48178100 | 8.35121200  | -5.72557600 |
| H | 24.87070100 | 8.61920800  | -6.71524600 |
| H | 23.39836800 | 8.50879400  | -5.72688800 |
| H | 24.92987000 | 9.01707700  | -4.97988000 |
| C | 20.30593300 | -1.86568500 | -2.81869300 |
| C | 20.74330300 | -2.46244400 | -3.99628400 |
| C | 20.92592300 | -0.74265500 | -2.28692100 |
| C | 21.84672500 | -1.92840500 | -4.67259800 |
| H | 20.22335100 | -3.33565200 | -4.36161800 |
| C | 22.03499000 | -0.19004700 | -2.94012300 |
| C | 22.47104300 | -0.79630100 | -4.12729100 |
| H | 23.32339000 | -0.37295500 | -4.64417600 |
| C | 16.47991900 | -4.90079300 | -0.50960600 |



|   |             |              |             |
|---|-------------|--------------|-------------|
| C | 16.17704800 | -6.07890300  | -1.18910600 |
| C | 15.87889700 | -4.58267700  | 0.69673500  |
| C | 15.27517800 | -6.98847000  | -0.63239700 |
| H | 16.64534100 | -6.26058800  | -2.14327200 |
| C | 14.97081300 | -5.48005000  | 1.28424500  |
| H | 16.11767100 | -3.63614000  | 1.16079200  |
| C | 14.68839800 | -6.66976400  | 0.60632600  |
| H | 13.99018400 | -7.37003300  | 1.04250400  |
| C | 22.38528600 | -2.54330600  | -5.98035400 |
| C | 22.31256600 | -1.48274000  | -7.11179300 |
| H | 22.90594200 | -0.59744900  | -6.86243400 |
| H | 22.70111800 | -1.90789800  | -8.04485700 |
| H | 21.27536900 | -1.17008000  | -7.27304400 |
| C | 21.56979400 | -3.78019600  | -6.42345300 |
| H | 21.60934700 | -4.57278300  | -5.66783500 |
| H | 20.52265800 | -3.51826200  | -6.61161700 |
| H | 21.99454400 | -4.17437800  | -7.35331200 |
| C | 23.85912500 | -2.98295000  | -5.76914200 |
| H | 23.92038000 | -3.73542400  | -4.97559600 |
| H | 24.25434900 | -3.41517800  | -6.69616900 |
| H | 24.48854600 | -2.13246900  | -5.48889200 |
| C | 14.90479700 | -8.31195500  | -1.33119700 |
| C | 15.64217000 | -8.48706400  | -2.67912200 |
| H | 15.38315200 | -7.68558200  | -3.37990600 |
| H | 16.72866300 | -8.50031200  | -2.53783700 |
| H | 15.34483300 | -9.44113300  | -3.12823000 |
| C | 15.28889800 | -9.50078700  | -0.40936000 |
| H | 14.76169000 | -9.44467300  | 0.54824300  |
| H | 15.02377000 | -10.44760600 | -0.89471500 |
| H | 16.36641400 | -9.49554300  | -0.21281200 |
| C | 13.37700900 | -8.33562900  | -1.60627400 |
| H | 12.80636300 | -8.25243800  | -0.67597500 |
| H | 13.09626800 | -7.50334200  | -2.26052100 |
| H | 13.10272500 | -9.27712000  | -2.09684100 |
| C | 14.35814000 | -5.14214900  | 2.65690200  |
| C | 15.49322700 | -5.18880300  | 3.71490000  |
| H | 16.27992400 | -4.46693700  | 3.47144400  |
| H | 15.09295600 | -4.94685500  | 4.70641900  |
| H | 15.94061500 | -6.18806000  | 3.74901800  |
| C | 13.72926500 | -3.72395000  | 2.62490300  |
| H | 13.29034600 | -3.49322400  | 3.60262600  |
| H | 14.47633800 | -2.95477900  | 2.40685100  |
| H | 12.94077500 | -3.67183200  | 1.86661000  |
| C | 13.25903800 | -6.14728500  | 3.07368000  |
| H | 12.44493100 | -6.16747700  | 2.34059700  |
| H | 13.66399900 | -7.15905500  | 3.18617500  |

|   |             |             |             |
|---|-------------|-------------|-------------|
| H | 12.84344300 | -5.84093400 | 4.04002100  |
| C | -0.14574100 | 8.82378000  | -5.55107300 |
| H | -0.30512100 | 7.82421700  | -5.13442300 |
| H | 0.83034300  | 9.18843500  | -5.21355400 |
| H | -0.92441000 | 9.48924600  | -5.15989300 |
| H | 8.56225700  | 0.73478700  | -5.23793800 |
| H | 20.53762100 | -0.32478800 | -1.37000500 |
| C | 22.76751000 | 1.05543000  | -2.40322700 |
| C | 24.25959400 | 0.70344200  | -2.16277500 |
| H | 24.74204400 | 0.37120600  | -3.08709800 |
| H | 24.79325000 | 1.58780300  | -1.79923000 |
| H | 24.34862300 | -0.09380400 | -1.41680000 |
| C | 22.16705600 | 1.55609700  | -1.06887600 |
| H | 22.73436100 | 2.42860900  | -0.72779000 |
| H | 21.12216400 | 1.86133000  | -1.19271700 |
| H | 22.22447900 | 0.78498400  | -0.29202000 |
| C | 22.65945500 | 2.20069200  | -3.44658500 |
| H | 21.60741000 | 2.44635900  | -3.62871900 |
| H | 23.16748600 | 3.09770000  | -3.07580900 |
| H | 23.11478900 | 1.90865600  | -4.39856500 |

D 6 92 207 209 F

D 6 92 207 5 F

D 1 91 198 199 F

D 1 91 198 2 F

D 18 96 346 348 F

D 18 96 346 17 F

D 13 95 398 340 F

D 13 95 398 14 F

D 19 90 268 269 F

D 19 90 268 20 F

D 24 89 273 274 F

D 24 89 273 23 F

D 7 93 137 139 F

D 7 93 137 8 F

D 12 94 128 129 F

D 12 94 128 11 F

**1''** (cone, R=3,5-di-*tert*-butylphenyl)

|                                          |                             |
|------------------------------------------|-----------------------------|
| Zero-point correction=                   | 3.479441 (Hartree/Particle) |
| Thermal correction to Energy=            | 3.668977                    |
| Thermal correction to Enthalpy=          | 3.669921                    |
| Thermal correction to Gibbs Free Energy= | 3.234952                    |

Sum of electronic and zero-point Energies= -8427.036813  
 Sum of electronic and thermal Energies= -8426.847277  
 Sum of electronic and thermal Enthalpies= -8426.846332  
 Sum of electronic and thermal Free Energies= -8427.281302

|   |             |             |              |
|---|-------------|-------------|--------------|
| C | 13.07894500 | 14.79058800 | -2.26246800  |
| C | 12.88190900 | 14.24874200 | -3.50398000  |
| C | 11.92215500 | 13.22509100 | -3.69703000  |
| C | 11.15234300 | 12.76489600 | -2.58387300  |
| C | 11.33375700 | 13.37971000 | -1.32194500  |
| C | 12.28204200 | 14.35401500 | -1.15026900  |
| C | 12.96952300 | 4.76519400  | 3.32930100   |
| C | 12.22055500 | 5.45568500  | 2.40554300   |
| C | 11.62314600 | 4.76667600  | 1.30836200   |
| C | 11.89492000 | 3.37069500  | 1.15272100   |
| C | 12.64157600 | 2.67813900  | 2.13211000   |
| C | 13.14581900 | 3.34062100  | 3.21096000   |
| C | 19.17412000 | -0.39253100 | -4.57670800  |
| C | 18.48360500 | 0.06648700  | -5.66245000  |
| C | 17.07013900 | 0.10719900  | -5.64050000  |
| C | 16.35503000 | -0.31842700 | -4.47658600  |
| C | 17.09499700 | -0.77355200 | -3.34981900  |
| C | 18.46872900 | -0.81712900 | -3.39709700  |
| C | 18.57545600 | 8.86776600  | -4.72078400  |
| C | 17.71388100 | 9.42463400  | -5.63165600  |
| C | 17.05954200 | 8.60199200  | -6.58478700  |
| C | 17.36680900 | 7.20569600  | -6.63629100  |
| C | 18.24291000 | 6.65118500  | -5.66878700  |
| C | 18.80916100 | 7.44792200  | -4.71567000  |
| N | 16.83150200 | 6.41086300  | -7.60446800  |
| N | 11.73737000 | 12.68971600 | -4.93337400  |
| N | 10.25491500 | 11.74911600 | -2.72970900  |
| N | 10.74393800 | 5.39516000  | 0.46177000   |
| N | 11.36731800 | 2.66273000  | 0.11728500   |
| N | 16.41046300 | 0.54923000  | -6.74232100  |
| N | 14.98523900 | -0.30355400 | -4.46831900  |
| N | 16.15020900 | 9.13806700  | -7.45232200  |
| C | 15.62813600 | 8.34211500  | -8.38994700  |
| C | 16.00668200 | 6.96616200  | -8.49589700  |
| C | 15.42057900 | 6.13928900  | -9.54861000  |
| C | 14.67922600 | 6.73935400  | -10.59766000 |
| C | 10.81090300 | 11.73807000 | -5.07742100  |
| C | 10.07174100 | 11.24059400 | -3.95246000  |
| C | 9.13086500  | 10.13580900 | -4.14385400  |
| C | 8.70117500  | 9.83781400  | -5.46261400  |

|   |             |             |              |
|---|-------------|-------------|--------------|
| C | 10.12149400 | 4.64959600  | -0.46272800  |
| C | 10.47311700 | 3.27239800  | -0.65677000  |
| C | 9.81549100  | 2.49686400  | -1.70208800  |
| C | 8.51280400  | 2.88510000  | -2.08303200  |
| C | 15.07869100 | 0.52077700  | -6.73556200  |
| C | 14.34624500 | 0.07749400  | -5.58277900  |
| C | 12.87831100 | 0.07388200  | -5.64490200  |
| C | 12.24882700 | 0.19796300  | -6.91446600  |
| C | 14.56646100 | 8.84332900  | -9.26242400  |
| C | 13.74125600 | 9.87614800  | -8.79258400  |
| C | 14.21875000 | 8.12976500  | -10.43708500 |
| C | 12.56366000 | 10.22125500 | -9.45964300  |
| C | 10.70068300 | 0.17324400  | -4.52489700  |
| C | 10.57797600 | 11.17804600 | -6.40472700  |
| C | 11.54225500 | 11.33070800 | -7.41537800  |
| C | 9.42684200  | 10.38342700 | -6.61832500  |
| C | 11.39883800 | 10.68143300 | -8.64395200  |
| C | 14.75544000 | 3.90918900  | -10.28573900 |
| C | 14.37116600 | 1.02256200  | -7.90756900  |
| C | 15.02521200 | 1.90450200  | -8.78033600  |
| C | 12.99623500 | 0.73853300  | -8.05803600  |
| C | 14.32186400 | 2.57243900  | -9.78409300  |
| C | 9.88069000  | 0.77186800  | -3.42192200  |
| C | 9.01036400  | 5.19180000  | -1.26049000  |
| C | 8.88166900  | 6.56076500  | -1.56494200  |
| C | 8.07660700  | 4.26092100  | -1.80040900  |
| C | 7.80824800  | 7.02480500  | -2.34093400  |
| C | 7.92322100  | 8.20701400  | -3.25335600  |
| C | 7.36997500  | 8.03043600  | -4.54816700  |
| C | 8.48795200  | 0.98514800  | -3.59783600  |
| C | 10.10057000 | 0.02357000  | -5.79958100  |
| C | 14.20748200 | 4.50020900  | -11.44857000 |
| C | 8.73924300  | 9.32599100  | -3.05691700  |
| C | 6.72244500  | 6.13304700  | -2.53437300  |
| C | 10.14514500 | 10.08145500 | -8.91862900  |
| C | 15.44909000 | 4.74598000  | -9.40949700  |
| C | 12.39082400 | 9.70699200  | -10.76828700 |
| C | 12.09941800 | 0.06513200  | -4.47225900  |
| C | 12.99577700 | 2.14882600  | -10.04123800 |
| C | 10.48500600 | 1.45706700  | -2.36092500  |
| C | 9.18156000  | 9.94712100  | -7.93663700  |
| C | 7.73589500  | 8.82527000  | -5.61358200  |
| C | 13.19968700 | 8.68725500  | -11.24316200 |
| C | 14.17499500 | 5.87863800  | -11.59923700 |
| C | 10.85174100 | 0.03367500  | -6.95744000  |
| C | 12.35656500 | 1.24310900  | -9.21122900  |

|   |             |             |              |
|---|-------------|-------------|--------------|
| C | 7.82457500  | 2.01839800  | -2.95730500  |
| C | 6.86432700  | 4.77935800  | -2.29614300  |
| O | 19.60792000 | 6.93264800  | -3.69015500  |
| O | 19.39795900 | 9.57137400  | -3.84806000  |
| O | 14.01131100 | 15.78785300 | -1.97633900  |
| O | 12.50941800 | 15.02826100 | 0.04746700   |
| O | 13.56101700 | 5.26127400  | 4.47607700   |
| O | 13.75636700 | 2.71813400  | 4.30283400   |
| O | 20.55864400 | -0.44341300 | -4.50486300  |
| O | 19.30614000 | -1.30858300 | -2.41064200  |
| H | 13.44877100 | 14.58776400 | -4.35867900  |
| H | 10.71463200 | 13.05246500 | -0.49995600  |
| H | 12.02622500 | 6.51320700  | 2.52076100   |
| H | 12.74691100 | 1.60808200  | 2.02719200   |
| H | 18.98976300 | 0.40391700  | -6.55522300  |
| H | 16.55363000 | -1.09785000 | -2.47190600  |
| H | 17.51057300 | 10.48645300 | -5.64471100  |
| H | 18.44012000 | 5.58868600  | -5.69284900  |
| H | 13.95384700 | 10.26316600 | -7.80478200  |
| H | 12.44400500 | 11.87441000 | -7.16254000  |
| H | 16.06140700 | 2.13437200  | -8.56802100  |
| H | 9.70007600  | 7.21786100  | -1.29610600  |
| H | 6.73371400  | 7.17728200  | -4.73830100  |
| H | 7.93490200  | 0.39246300  | -4.31463800  |
| H | 9.02396200  | 0.01330400  | -5.89433900  |
| H | 9.15173200  | 9.56352500  | -2.08379600  |
| H | 5.80274100  | 6.50087000  | -2.97356200  |
| H | 9.98427200  | 9.60076800  | -9.87514400  |
| H | 15.90823200 | 4.35588400  | -8.51139800  |
| H | 11.55344000 | 10.04102300 | -11.37060900 |
| H | 12.63339400 | 0.07522700  | -3.53013500  |
| H | 12.42622800 | 2.63094000  | -10.82635900 |
| H | 11.52390200 | 1.29563100  | -2.10495100  |
| H | 8.27841600  | 9.39922500  | -8.17029100  |
| H | 7.34624300  | 8.58651300  | -6.59394800  |
| H | 12.96911400 | 8.24484700  | -12.20407800 |
| H | 13.67452300 | 6.29524500  | -12.46429000 |
| H | 10.33882100 | 0.01328000  | -7.91026900  |
| H | 11.31254800 | 1.02444600  | -9.39245800  |
| H | 6.78994500  | 2.21060800  | -3.21244800  |
| H | 6.06228500  | 4.10642600  | -2.57386600  |
| C | 13.33035800 | 1.39213000  | 4.60496100   |
| C | 14.16700400 | 0.32028500  | 4.35025100   |
| C | 12.06775700 | 1.21779500  | 5.17517400   |
| C | 13.74547500 | -0.98336600 | 4.67601600   |
| H | 15.13351900 | 0.51137600  | 3.90452700   |

|   |             |             |            |
|---|-------------|-------------|------------|
| C | 11.62693700 | -0.06064800 | 5.51272800 |
| H | 11.45845100 | 2.09189600  | 5.35073600 |
| C | 12.48323400 | -1.14734000 | 5.25093200 |
| H | 12.14623000 | -2.14250000 | 5.50331800 |
| C | 13.45750700 | 6.57687000  | 4.97807500 |
| C | 14.52445700 | 7.44692400  | 4.78972300 |
| C | 12.39349800 | 6.90004300  | 5.81319000 |
| C | 14.56053700 | 8.66601200  | 5.47933700 |
| H | 15.33936200 | 7.13373500  | 4.15110400 |
| C | 12.39990500 | 8.11223000  | 6.51470200 |
| H | 11.60256300 | 6.17470000  | 5.95020500 |
| C | 13.49139300 | 8.97774100  | 6.33527400 |
| H | 13.52261200 | 9.90089100  | 6.89275200 |
| C | 11.25834400 | 8.40947700  | 7.50963200 |
| C | 15.79066600 | 9.58314300  | 5.31868800 |
| C | 17.05917200 | 8.81113700  | 5.77465500 |
| H | 16.96733600 | 8.51691100  | 6.82569400 |
| H | 17.21019200 | 7.90850900  | 5.17464000 |
| H | 17.94211500 | 9.45163900  | 5.66326900 |
| C | 15.93837300 | 9.98880600  | 3.82862600 |
| H | 16.05777400 | 9.10869700  | 3.18913400 |
| H | 15.05423400 | 10.54112500 | 3.49432000 |
| H | 16.82025000 | 10.62817900 | 3.70257400 |
| C | 15.68322000 | 10.87130500 | 6.16759500 |
| H | 14.81566400 | 11.47102800 | 5.87337400 |
| H | 15.61172400 | 10.63808300 | 7.23587800 |
| H | 16.58372200 | 11.47572500 | 6.01172000 |
| C | 11.40591800 | 9.79374500  | 8.18315500 |
| H | 11.39303500 | 10.60190900 | 7.44370500 |
| H | 10.56545800 | 9.94803300  | 8.86897700 |
| H | 12.33350300 | 9.85785400  | 8.76256600 |
| C | 9.89559600  | 8.36952000  | 6.76982900 |
| H | 9.86258700  | 9.14291300  | 5.99640100 |
| H | 9.72890700  | 7.39823700  | 6.29390300 |
| H | 9.08075300  | 8.55092100  | 7.48067200 |
| C | 11.27499000 | 7.32782200  | 8.62504000 |
| H | 11.13160400 | 6.32736500  | 8.20519100 |
| H | 12.23270000 | 7.34570100  | 9.15604700 |
| H | 10.46913200 | 7.52189700  | 9.34294900 |
| C | 10.24763800 | -0.31584200 | 6.15196300 |
| C | 10.44244900 | -0.99323700 | 7.53522100 |
| H | 11.02260700 | -0.34215400 | 8.19798300 |
| H | 9.46587800  | -1.18483400 | 7.99565700 |
| H | 10.97066900 | -1.94689200 | 7.43727600 |
| C | 9.45056700  | 0.99257000  | 6.36139800 |
| H | 8.48326300  | 0.75354100  | 6.81703500 |

|   |             |             |             |
|---|-------------|-------------|-------------|
| H | 9.98306400  | 1.67755200  | 7.03074600  |
| H | 9.26249800  | 1.49882800  | 5.40807900  |
| C | 9.41908800  | -1.24644000 | 5.22566700  |
| H | 8.43751600  | -1.43900300 | 5.67490100  |
| H | 9.27241000  | -0.77544000 | 4.24785700  |
| H | 9.92385800  | -2.20600300 | 5.07564000  |
| C | 14.67339600 | -2.17485600 | 4.37241100  |
| C | 14.04177000 | -3.53012000 | 4.76819400  |
| H | 13.83201200 | -3.57259200 | 5.84282600  |
| H | 13.11371700 | -3.71175100 | 4.21493200  |
| H | 14.74519200 | -4.33463800 | 4.52654300  |
| C | 14.97200500 | -2.20725000 | 2.84946600  |
| H | 14.03962400 | -2.30993900 | 2.28380400  |
| H | 15.47937800 | -1.29540100 | 2.52048900  |
| H | 15.62062100 | -3.05771800 | 2.61148800  |
| C | 15.99251700 | -2.00445900 | 5.17007600  |
| H | 16.49907300 | -1.07407400 | 4.89720400  |
| H | 15.78858500 | -1.98517600 | 6.24606300  |
| H | 16.66933400 | -2.83890800 | 4.95371900  |
| C | 14.50812700 | 16.55646700 | -3.07053700 |
| C | 15.77476200 | 16.29994500 | -3.56780500 |
| C | 13.69248000 | 17.55259400 | -3.60633100 |
| C | 16.26606500 | 17.06598000 | -4.64150100 |
| H | 16.36288500 | 15.51273700 | -3.11535700 |
| C | 14.15515100 | 18.32866800 | -4.66939100 |
| H | 12.71337800 | 17.70396100 | -3.17658000 |
| C | 15.44295900 | 18.06399200 | -5.17166900 |
| H | 15.80460700 | 18.65660400 | -5.99980100 |
| C | 11.55971500 | 14.83098600 | 1.09081400  |
| C | 10.40173200 | 15.60197600 | 1.08645900  |
| C | 11.82908000 | 13.91227100 | 2.09449800  |
| C | 9.46949300  | 15.46054900 | 2.12017400  |
| H | 10.25415200 | 16.30681700 | 0.28174500  |
| C | 10.89272000 | 13.72036900 | 3.11972700  |
| H | 12.74712000 | 13.34579200 | 2.04540800  |
| C | 9.73437700  | 14.50984700 | 3.11737700  |
| H | 9.01024900  | 14.37224600 | 3.91093600  |
| C | 11.07157700 | 12.63416600 | 4.19670800  |
| C | 9.88458600  | 11.63823500 | 4.08947500  |
| H | 9.99710400  | 10.84063200 | 4.83139300  |
| H | 8.92846800  | 12.14084400 | 4.26577900  |
| H | 9.86006400  | 11.18476200 | 3.09289400  |
| C | 11.08870400 | 13.28543200 | 5.60413100  |
| H | 11.19556300 | 12.50780600 | 6.36939400  |
| H | 11.92916700 | 13.98249600 | 5.69127800  |
| H | 10.16124800 | 13.83351500 | 5.79862400  |

|   |             |             |             |
|---|-------------|-------------|-------------|
| C | 12.38299800 | 11.84046800 | 4.00599600  |
| H | 12.40927000 | 11.35085900 | 3.02588100  |
| H | 13.25811300 | 12.49407100 | 4.10091300  |
| H | 12.45238400 | 11.05947700 | 4.76940700  |
| C | 8.17579700  | 16.29691400 | 2.18321300  |
| C | 8.06369200  | 17.28766100 | 1.00123700  |
| H | 8.89874500  | 17.99711800 | 0.99867600  |
| H | 8.04085300  | 16.75936600 | 0.04158300  |
| H | 7.13264200  | 17.85687700 | 1.09850600  |
| C | 8.15951100  | 17.11189100 | 3.50437100  |
| H | 8.20083000  | 16.45142400 | 4.37626300  |
| H | 9.01876500  | 17.79003300 | 3.54253400  |
| H | 7.23930200  | 17.70520300 | 3.56334300  |
| C | 6.94891800  | 15.34651500 | 2.13931800  |
| H | 6.94880300  | 14.76924700 | 1.20856800  |
| H | 6.96080000  | 14.64654300 | 2.98075400  |
| H | 6.02347400  | 15.93233300 | 2.19047000  |
| C | 13.30614600 | 19.44857900 | -5.30298200 |
| C | 17.69184900 | 16.81490800 | -5.17033000 |
| C | 17.92369700 | 15.29751200 | -5.39775300 |
| H | 17.83524500 | 14.72712900 | -4.46817900 |
| H | 17.19939600 | 14.90451700 | -6.11940800 |
| H | 18.93305800 | 15.13754200 | -5.79462400 |
| C | 17.95720300 | 17.54324100 | -6.50978900 |
| H | 17.90485500 | 18.63122900 | -6.39323000 |
| H | 18.96510200 | 17.29161100 | -6.85778800 |
| H | 17.23958400 | 17.23080100 | -7.27655100 |
| C | 18.69655400 | 17.34861500 | -4.11444800 |
| H | 18.55914100 | 16.83740500 | -3.15676000 |
| H | 19.72583100 | 17.18062500 | -4.45351500 |
| H | 18.54664200 | 18.42237500 | -3.95757300 |
| C | 11.92525300 | 19.59025000 | -4.62156500 |
| H | 12.03095800 | 19.83998600 | -3.55986600 |
| H | 11.36728800 | 20.39797300 | -5.10799600 |
| H | 11.34078100 | 18.66818200 | -4.71509300 |
| C | 14.05765900 | 20.80002300 | -5.16464400 |
| H | 13.46427800 | 21.60288800 | -5.61811100 |
| H | 14.22095000 | 21.03672200 | -4.10775500 |
| H | 15.02998800 | 20.76440500 | -5.66599900 |
| C | 18.92727500 | 10.66876900 | -3.08272300 |
| C | 19.83353000 | 11.70193900 | -2.87544000 |
| C | 17.66969400 | 10.68059900 | -2.48873700 |
| C | 19.50479000 | 12.76882200 | -2.03228100 |
| H | 20.79060200 | 11.64472700 | -3.36959700 |
| C | 17.30143900 | 11.75073300 | -1.65983200 |
| H | 16.99350000 | 9.85416800  | -2.66115300 |



|   |             |             |             |
|---|-------------|-------------|-------------|
| C | 18.22925700 | 12.78234200 | -1.44565800 |
| H | 17.95761500 | 13.60071000 | -0.79773300 |
| C | 21.01564100 | 6.94757600  | -3.82878100 |
| C | 21.72431400 | 6.40427600  | -2.76557900 |
| C | 21.66610700 | 7.43268200  | -4.96077500 |
| C | 23.12379500 | 6.34735200  | -2.80820200 |
| H | 21.16221700 | 6.04330500  | -1.91525700 |
| C | 23.06058600 | 7.38201400  | -5.03245800 |
| H | 21.08131900 | 7.84020300  | -5.77095400 |
| C | 23.77168100 | 6.83788200  | -3.94847900 |
| H | 24.85025300 | 6.79797600  | -4.00187200 |
| C | 20.57441900 | 13.83446800 | -1.71394200 |
| C | 21.21550400 | 14.37085400 | -3.02061000 |
| H | 21.97026200 | 15.12743400 | -2.77552500 |
| H | 21.70763600 | 13.57023500 | -3.58122900 |
| H | 20.45545700 | 14.82795600 | -3.66121300 |
| C | 21.67311000 | 13.16451000 | -0.84228700 |
| H | 22.12945600 | 12.32330900 | -1.37375300 |
| H | 22.45545900 | 13.89409300 | -0.59985400 |
| H | 21.23902500 | 12.78892100 | 0.09056300  |
| C | 19.99539200 | 15.03397400 | -0.92815700 |
| H | 19.59821700 | 14.72184900 | 0.04356800  |
| H | 20.79330900 | 15.76313800 | -0.74851700 |
| H | 19.19994900 | 15.53041100 | -1.49390900 |
| C | 15.92765200 | 11.72530800 | -0.95641500 |
| C | 14.80410900 | 11.43899400 | -1.98581000 |
| H | 13.83352600 | 11.43277600 | -1.47777800 |
| H | 14.78159300 | 12.21417700 | -2.75697900 |
| H | 14.94157900 | 10.46669300 | -2.46898000 |
| C | 15.95135800 | 10.59081900 | 0.10468800  |
| H | 16.15056700 | 9.62214600  | -0.36526200 |
| H | 16.73188700 | 10.78243800 | 0.84897700  |
| H | 14.98245800 | 10.53819900 | 0.61572800  |
| C | 15.60382400 | 13.05778100 | -0.23749200 |
| H | 16.33612700 | 13.27566800 | 0.54798800  |
| H | 15.55811900 | 13.90458300 | -0.93061600 |
| H | 14.61975600 | 12.97977100 | 0.23747600  |
| C | 23.89189500 | 5.78396100  | -1.59475500 |
| C | 23.36294500 | 4.36864700  | -1.24227000 |
| H | 23.91075400 | 3.97412200  | -0.37803500 |
| H | 22.29817300 | 4.39313300  | -0.99104100 |
| H | 23.50092000 | 3.68580200  | -2.08680300 |
| C | 23.67178400 | 6.73357600  | -0.38561400 |
| H | 24.05133300 | 7.73468900  | -0.61708800 |
| H | 22.60727600 | 6.81570900  | -0.14430600 |
| H | 24.20188100 | 6.34908300  | 0.49435300  |

|   |             |             |              |
|---|-------------|-------------|--------------|
| C | 25.41184500 | 5.67721800  | -1.85992300  |
| H | 25.85245500 | 6.66177100  | -2.05179900  |
| H | 25.90053200 | 5.25391100  | -0.97516800  |
| H | 25.61802000 | 5.02182300  | -2.71348700  |
| C | 23.83225000 | 7.90407500  | -6.26220500  |
| C | 24.78758600 | 9.04501600  | -5.81978200  |
| H | 24.21393100 | 9.87134800  | -5.38626900  |
| H | 25.50405200 | 8.69136000  | -5.07183000  |
| H | 25.34669200 | 9.41969300  | -6.68571000  |
| C | 24.65700400 | 6.74310800  | -6.88027200  |
| H | 23.99103500 | 5.93466500  | -7.20041000  |
| H | 25.21554400 | 7.10572900  | -7.75166700  |
| H | 25.37043500 | 6.33711500  | -6.15639400  |
| C | 22.88887100 | 8.46061100  | -7.35402800  |
| H | 23.48911500 | 8.81627600  | -8.19899900  |
| H | 22.20784500 | 7.68531200  | -7.72214600  |
| H | 22.29817300 | 9.30249900  | -6.97616000  |
| C | 21.38235400 | -1.07600000 | -5.47245600  |
| C | 20.83731600 | -1.83178500 | -6.50839400  |
| C | 22.77150800 | -0.93077700 | -5.29909000  |
| C | 21.65221600 | -2.45069500 | -7.46187800  |
| H | 19.76450100 | -1.92947000 | -6.56673900  |
| C | 23.57149400 | -1.55513900 | -6.26656100  |
| C | 23.03612500 | -2.28542600 | -7.32656000  |
| H | 24.64668600 | -1.47134400 | -6.19074100  |
| H | 23.71056900 | -2.73760900 | -8.04404800  |
| C | 18.99637100 | -1.35701800 | -1.03076400  |
| C | 19.04317400 | -2.60448100 | -0.42278700  |
| C | 18.81973100 | -0.19093600 | -0.29619700  |
| C | 18.94720900 | -2.70676700 | 0.97000100   |
| H | 19.19949700 | -3.47163400 | -1.04952500  |
| C | 18.72514400 | -0.26106800 | 1.10013100   |
| H | 18.80105600 | 0.75931500  | -0.81271100  |
| C | 18.79144300 | -1.52445900 | 1.71146100   |
| H | 18.73520000 | -1.58659100 | 2.78682300   |
| C | 21.07540800 | -3.28427800 | -8.62215500  |
| C | 21.50580600 | -2.64590600 | -9.97030600  |
| H | 22.59629000 | -2.60786400 | -10.05716800 |
| H | 21.11171900 | -3.23765400 | -10.80526300 |
| H | 21.11625400 | -1.62518100 | -10.04785000 |
| C | 19.53085900 | -3.34990900 | -8.58710300  |
| H | 19.17486300 | -3.81807200 | -7.66251700  |
| H | 19.08766800 | -2.35157500 | -8.67373200  |
| H | 19.17840800 | -3.95264600 | -9.43152100  |
| C | 21.62674700 | -4.73278000 | -8.53269800  |
| H | 21.32519600 | -5.19505700 | -7.58660600  |

|   |             |             |              |
|---|-------------|-------------|--------------|
| H | 21.23146900 | -5.33358400 | -9.36062400  |
| H | 22.71979700 | -4.74190200 | -8.58937100  |
| C | 19.04871700 | -4.09914400 | 1.62727400   |
| C | 17.82383100 | -4.94976500 | 1.19663400   |
| H | 16.89751100 | -4.47443600 | 1.53587900   |
| H | 17.78071600 | -5.05105100 | 0.10743200   |
| H | 17.88831700 | -5.95144800 | 1.63830900   |
| C | 20.35576800 | -4.79797000 | 1.16290200   |
| H | 21.22797600 | -4.20073300 | 1.44921400   |
| H | 20.43344500 | -5.78453000 | 1.63494200   |
| H | 20.37170100 | -4.93573200 | 0.07767600   |
| C | 19.07726500 | -4.02267200 | 3.17111300   |
| H | 19.93039500 | -3.43089200 | 3.52111300   |
| H | 18.15632100 | -3.58473100 | 3.56857300   |
| H | 19.17277600 | -5.03607000 | 3.57684400   |
| C | 18.54127500 | 1.04217800  | 1.90583300   |
| C | 19.63137300 | 2.07245700  | 1.50413100   |
| H | 19.57077300 | 2.32845400  | 0.44216200   |
| H | 19.49701500 | 2.99280500  | 2.08427200   |
| H | 20.62924300 | 1.66969400  | 1.70808100   |
| C | 17.13589500 | 1.62199200  | 1.59047900   |
| H | 16.97274800 | 2.54848500  | 2.15348100   |
| H | 17.03217300 | 1.83911100  | 0.52247400   |
| H | 16.35874400 | 0.90182200  | 1.86986600   |
| C | 18.64983900 | 0.81292000  | 3.43128400   |
| H | 17.86025400 | 0.14843200  | 3.79665600   |
| H | 19.62260400 | 0.38482700  | 3.69822400   |
| H | 18.54275500 | 1.77439400  | 3.94529700   |
| C | 23.37130000 | -0.15351700 | -4.11080800  |
| C | 22.92210800 | 1.33156600  | -4.18107400  |
| H | 23.34793600 | 1.88823900  | -3.33797600  |
| H | 23.27512700 | 1.78898800  | -5.11233000  |
| H | 21.83529300 | 1.40088300  | -4.13652300  |
| C | 24.91878600 | -0.18326600 | -4.12978900  |
| H | 25.29789400 | -1.20885200 | -4.05475300  |
| H | 25.32247000 | 0.28114600  | -5.03632500  |
| H | 25.28840600 | 0.37992800  | -3.26567700  |
| C | 22.90785800 | -0.80050600 | -2.77388000  |
| H | 21.82061000 | -0.82770300 | -2.70561300  |
| H | 23.29511600 | -1.82397700 | -2.70558200  |
| H | 23.31039500 | -0.22237600 | -1.93278400  |
| C | 13.07659600 | 19.12886600 | -6.80481600  |
| H | 14.02682100 | 19.05443800 | -7.34288000  |
| H | 12.54166600 | 18.17931600 | -6.91329900  |
| H | 12.47945800 | 19.92418700 | -7.26653500  |
| H | 13.74067400 | 3.87444900  | -12.20097100 |

D 6 92 207 209 F  
D 6 92 207 5 F  
D 1 91 198 199 F  
D 1 91 198 2 F  
D 18 96 346 348 F  
D 18 96 346 17 F  
D 13 95 398 340 F  
D 13 95 398 14 F  
D 19 90 268 269 F  
D 19 90 268 20 F  
D 24 89 273 274 F  
D 24 89 273 23 F  
D 7 93 137 139 F  
D 7 93 137 8 F  
D 12 94 128 129 F  
D 12 94 128 11 F

## References

1. Williams, A. T. R.; Winfield, S. A.; Miller, J. N., Relative fluorescence quantum yields using a computer-controlled luminescence spectrometer. *Analyst* **1983**, *108*, 1067-1071.
2. Rurack, K.; Spieles, M., Fluorescence Quantum Yields of a Series of Red and Near-Infrared Dyes Emitting at 600–1000 nm. *Anal. Chem.* **2011**, *83*, 1232–1242.
3. Wang, K.; Jiang, P.; Zhang, Z.-G.; Fu, Q.; Li, Y., Synthesis and Photovoltaic Properties of D–A Copolymers Based on 11,12-Difluorodibenzo[a,c]phenazine Acceptor Unit. *Macromol. Chem. Phys.* **2013**, *214* (16), 1772-1779.
4. Si C, Sun D, Matulaitis T, Cordes D, Slawin A, Zysman-Colman E. Rational Molecular Design of Efficient Yellow-Red Dendrimer TADF for Solution-Processed OLEDs: A Combined Effect of Substitution Position and Strength of the Donors. ChemRxiv. 2023; doi:10.26434/chemrxiv-2023-93jq8 This content is a preprint and has not been peer-reviewed.
5. Spek, A., Single-crystal structure validation with the program PLATON. *J. Appl. Cryst.* **2003**, *36* (1), 7-13.
6. Spek, A., Structure validation in chemical crystallography. *Acta Cryst. D* **2009**, *65* (2), 148-155.
7. Sheldrick, G. M., SHELXT - Integrated space-group and crystal-structure determination. *Acta Cryst. A* **2015**, *71*, 3-8.
8. Sheldrick, G. M., Crystal structure refinement with SHELXL. *Acta Cryst. C* **2015**, *71*, 3-8.
9. Dolomanov, O. V.; Bourhis, L. J.; Gildea, R. J.; Howard, J. A. K.; Puschmann, H., OLEX2: a complete structure solution, refinement and analysis program. *J. Appl. Cryst.* **2009**, *42*, 339-341.
10. Frisch, M. J.; Trucks, G. W.; Schlegel, H. B.; Scuseria, G. E.; Robb, M. A.; Cheeseman, J. R.; Scalmani, G.; Barone, V.; Petersson, G. A.; Nakatsuji, H.; Li, X.; Caricato, M.; Marenich, A. V.; Bloino, J.; Janesko, B. G.; Gomperts, R.; Mennucci, B.; Hratchian, H. P.; Ortiz, J. V.; Izmaylov, A. F.; Sonnenberg, J. L.; Williams, Ding, F.; Lipparini, F.; Egidi, F.; Goings, J.; Peng, B.; Petrone, A.; Henderson, T.; Ranasinghe, D.; Zakrzewski, V. G.; Gao, J.; Rega, N.; Zheng, G.; Liang, W.; Hada, M.; Ehara, M.; Toyota, K.; Fukuda, R.; Hasegawa, J.; Ishida, M.; Nakajima, T.; Honda, Y.; Kitao, O.; Nakai, H.; Vreven, T.; Throssell, K.; Montgomery Jr., J. A.; Peralta, J. E.; Ogliaro, F.; Bearpark, M. J.; Heyd, J. J.; Brothers, E. N.; Kudin, K. N.; Staroverov, V. N.;

Keith, T. A.; Kobayashi, R.; Normand, J.; Raghavachari, K.; Rendell, A. P.; Burant, J. C.; Iyengar, S. S.; Tomasi, J.; Cossi, M.; Millam, J. M.; Klene, M.; Adamo, C.; Cammi, R.; Ochterski, J. W.; Martin, R. L.; Morokuma, K.; Farkas, O.; Foresman, J. B.; Fox, D. J. *Gaussian 16 Rev. C.01*, Wallingford, CT, 2016.

11. Becke, A. D., Density-functional exchange-energy approximation with correct asymptotic behavior. *Phys. Rev. A Gen. Phys.* **1988**, *38* (6), 3098-3100.
12. Grimme, S.; Ehrlich, S.; Goerigk, L., Effect of the damping function in dispersion corrected density functional theory. *J. Comput. Chem.* **2011**, *32* (7), 1456-1465.
13. Cancès, E.; Mennucci, B.; Tomasi, J., A new integral equation formalism for the polarizable continuum model: Theoretical background and applications to isotropic and anisotropic dielectrics. *J. Chem. Phys.* **1997**, *107* (8), 3032-3041.
14. Wolinski, K.; Hinton, J. F.; Pulay, P., Efficient implementation of the gauge-independent atomic orbital method for NMR chemical shift calculations. *J. Am. Chem. Soc.* **1990**, *112* (23), 8251-8260.
15. Lu, T.; Chen, Q., Independent gradient model based on Hirshfeld partition: A new method for visual study of interactions in chemical systems. *J. Comput. Chem.* **2022**, *43* (8), 539-555.
16. Humphrey, W.; Dalke, A.; Schulten, K., VMD: Visual molecular dynamics. *J. Mol. Graph.* **1996**, *14* (1), 33-38.
17. Lu, T.; Chen, F., Multiwfn: A multifunctional wavefunction analyzer. *J. Comput. Chem.* **2012**, *33* (5), 580-592.
18. Data obtained from: <https://organicchemistrydata.org/solvents/> The data in the table was adapted by Dr. Brian J. Myers, Webmaster of ACS Division of Organic Division (DOC) from: Professor Murov's Organic solvent table. The values were obtained from the CRC (87th edition), or Vogel's Practical Organic Chemistry (5th ed.).
19. <http://supramolecular.org/>
